# Supplementary material for: Synthesis and techno-economic assessment of microbial-based processes for terpenes production
Source: Biotechnol Biofuels. 2018 Oct 27;11:294. doi: 10.1186/s13068-018-1285-7 (PMC6203976; doi:10.1186/s13068-018-1285-7)
Supplement: Supplementary file 2 — Additional file 2. Editable Excel file containing (1) assumptions for TEA, (2) VLE calculations, and (3) Figures. [file 13068_2018_1285_MOESM2_ESM.xlsx]

## Sheet: VLE
Red Bold are to be changed by cases; Blue Bold are to be changed by compounds
Process drivers	Fixed parameters			After reactions in fermenter (before VLE module)								In condensor
Glucose (T/h) - fixed	Input T (K)	303		m (T/h)	MW (g/mol)	Density (g/L)	Antoine A	Antoine B	Antoine C	P0 (Pa)	n (kmol/h)	P (Pa)	Cond. T (K)	272.49
40	P (Pa)	101325	Total gas	107.459	32.1697	1.16494	-	-	-	96828.8	3340.36	100773	Cond. Total P (Pa)	101325
Glucose wt%	R (J/kg/K)	287.058	Air	76.4003	29	1.16494	-	-	-	-	2634.49	-
14	Res time (hr)	45	CO2	31.0583	44	1.16494	-	-	-	-	705.87	-
Glucose to prod yield (g/g)			Limonen	0.0576	136	841	-	-	-	253.614	0.423529	0
0.00144			Water	259.725	18	1000	4.6543	1435.26	-64.848	4242.56	14429.2	552.199
VVM
0.1						kmol/h	T/h
					Initial air	3215.06	93.2366
VLE results in fermenter													VLE results in condensor
n_component_phase	kmol/h	MT/h											n_component_phase	kmol/h	MT/h
n_lim_v	0.423529	0.0576											n_lim_vv	0	0
n_w_v	145.994	2.6279											n_w_vv	18.304	0.329472
n_lim_l	0	0											n_lim_vl	0.423529	0.0576
n_w_l	14283.2	257.097											n_w_vl	127.69	2.29843
lim split fraction to vapor (α)	1												lim fraction to liq (λ)	1
liq titer (β) (g/L)	0												lim titer in cond. (ω) (g/L)	24.3355
* water split to vapor	0.010118												* water split to liquid	0.874625
Paremeters for the 3 cases
	Case 1	Case 2	Case 3
Glucose wt%	14	10	24
Yield (g/g)	0.00144	0.1216	0.304
VVM	0.1	0.1	0.01

## Sheet: Infeasible VVM, density, Antoin
Desnsity of glucose-water mixture
Glucose concentration wt%	rou (g/L)
0	1000
0.1764	1058
0.4286	1127
Infeasible glucose concentration-yield combinations for specific VVM values
* The threashold infeasible combinations (due to insufficient O2 supply) are marked in red and shown in the figures
VVM			VVM			VVM			VVM			VVM
1			0.1			0.01			0.1			0.01
concentration	yield		concentration	yield		concentration	yield		yield	concentration		yield	concentration
0.01	-51.2646		0.01	-4.83846		0.01	-0.195846		0.0104023	0.17		0.0146	0.018
0.02	-25.3967		0.02	-2.25167		0.018	0.0340911		0.0284189	0.18		0.0453005	0.02
0.03	-16.7744		0.03	-1.38944		0.02	0.0628328		0.0445347	0.19		0.137401	0.03
0.04	-12.4634		0.04	-0.958344		0.03	0.149056		0.0590348	0.2		0.183449	0.04
0.05	-9.87705		0.05	-0.699705		0.04	0.192166		0.0721502	0.21		0.211076	0.05
0.06	-8.15293		0.06	-0.527293		0.05	0.21803		0.0840696	0.22		0.229492	0.06
0.07	-6.92154		0.07	-0.404154		0.06	0.235271		0.0949491	0.23		0.242645	0.07
0.08	-5.9981		0.08	-0.31181		0.07	0.247585		0.104919	0.24		0.252509	0.08
0.09	-5.27996		0.09	-0.239996		0.08	0.256819		0.114088	0.25		0.26018	0.09
0.1	-4.70554		0.1	-0.182554		0.09	0.264		0.122548	0.26		0.266316	0.1
0.11	-4.23563		0.11	-0.135563		0.1	0.269745		0.130379	0.27		0.271335	0.11
0.12	-3.8441		0.12	-0.0964102		0.11	0.274444		0.137648	0.28		0.275517	0.12
0.13	-3.51288		0.13	-0.0632875		0.12	0.278359		0.144413	0.29		0.279055	0.13
0.14	-3.22902		0.14	-0.0349024		0.13	0.281671		0.150725	0.3		0.282087	0.14
0.15	-2.98307		0.15	-0.0103072		0.14	0.28451					0.284715	0.15
0.16	-2.76791		0.16	0.0112086		0.15	0.286969					0.287013	0.16
0.17	-2.57811		0.17	0.0301886		0.16	0.289121					0.28904	0.17
0.18	-2.40945		0.18	0.0470553		0.17	0.291019					0.290842	0.18
0.19	-2.25857		0.19	0.0621426		0.18	0.292706					0.292453	0.19
0.2	-2.12283		0.2	0.0757173		0.19	0.294214					0.293903	0.2
0.21	-2.00004		0.21	0.0879955		0.2	0.295572					0.295215	0.21
0.22	-1.88846		0.22	0.0991542		0.21	0.2968					0.296407	0.22
0.23	-1.78661		0.23	0.109339		0.22	0.297915					0.297495	0.23
0.24	-1.69327		0.24	0.118673		0.23	0.298934					0.298492	0.24
0.25	-1.60744		0.25	0.127256		0.24	0.299867					0.299409	0.25
0.26	-1.52823		0.26	0.135177		0.25	0.300726					0.300255	0.26
0.27	-1.45492		0.27	0.142508		0.26	0.301518					0.301038	0.27
0.28	-1.38687		0.28	0.149313		0.27	0.302251					0.301765	0.28
0.29	-1.32354		0.29	0.155646		0.28	0.302931					0.302441	0.29
0.3	-1.26445		0.3	0.161555		0.29	0.303565					0.303073	0.3
						0.3	0.304156
Limonene Antoine constants
T is in K, P is in mmHg
	A	B	C
Limonene	6.17157	1114.54	-114.325
Dodecane	6.9979	1639.27	-91.36
*Relative volatility for distillation calculation = P_limonene/P_dodecane

## Sheet: Configuration comparison
		* "99999.00" represent scenarios where the corresponding configuration cannot be used due to zero product recovery
		* The 3 case studies are marked in red
		Case 1 concentration & yield						Case 2 concentration & yield						Case 3 concentration & yield
		concentration	Yield (g/g)					concentration	Yield (g/g)					concentration	Yield (g/g)
		0.14	0.00144					0.1	0.1216					0.24	0.304
			$/kg						$/kg						$/kg
		VVM (min-1)	Config. 1	Config. 2	Config. 3	Min		VVM (min-1)	Config. 1	Config. 2	Config 3.	Min		VVM (min-1)	Config. 1	Config. 2	Config 3.	Min
		0.084	460.556	462.74	99999	460.556		0.037	41.81	5.53	6.154	5.53		0.0074	142.09	2.06	2.02	2.02
		0.1	464.937	467.1	99999	464.937		0.1	16.67	5.82	8.418	5.82		0.01	127.17	2.07	2.02	2.02
		0.1756	485.622	487.82	99999	485.622		0.1333	12.88	5.97	10.336	5.97		0.10666	28.47	2.15	2.2	2.15
		0.2672	510.669	512.63	99999	510.669		0.2296	8.07	6.41	27.603	6.41		0.20592	16.35	2.23	2.41	2.23
		0.3588	535.706	537.71	99999	535.706		0.25	7.52	6.51	41.727	6.51		0.30518	11.72	2.31	2.64	2.31
		0.4504	560.736	562.51	99999	560.736		0.28	6.86	6.64	159.848	6.64		0.40444	9.28	2.39	2.9	2.39
		0.542	585.763	587.59	99999	585.763		0.29	6.67	6.69	2292.7	6.67		0.5037	7.75	2.47	3.22	2.47
		0.6336	610.785	612.67	99999	610.785		0.3	6.7	6.74	99999	6.7		0.60296	6.73	2.55	3.59	2.55
		0.7252	635.805	637.48	99999	635.805		0.3259	6.82	6.85	99999	6.82		0.70222	5.99	2.63	4.04	2.63
		0.8168	660.822	662.56	99999	660.822		0.4222	7.26	7.3	99999	7.26		0.80148	5.42	2.71	4.61	2.71
		0.9084	685.838	687.36	99999	685.838		0.5185	7.71	7.74	99999	7.71		0.90074	4.98	2.8	5.33	2.8
		1	710.851	712.44	99999	710.851		0.6148	8.15	8.18	99999	8.15		1	4.62	2.88	6.27	2.88
								0.7111	8.59	8.62	99999	8.59
								0.8074	9.03	9.06	99999	9.03
								0.9037	9.48	9.5	99999	9.48
								1	9.92	9.94	99999	9.92

## Sheet: TEA parameters
Capital cost						Feedstock cost			Utility cost			Other
	Fermenter	Compressor	Condenser	Centrifuge		Glucose ($/kg)	0.6		Chilled water ($/T)	0.4		Costing year	2016
PC (purhcase cost) Base size	3500 m3	2982 KW	95 m2	27 m3/h		Water ($/m3)	0.85		Cooling water ($/T)	0.05		Operating days per year	330
PC Base cost ($)	700000	3236000	39000	258000		Dodecane ($/kg)	1.5		Freon ($/Mcal)	0.1		Operating capacity (%)	100
PC power law exponent	0.6	0.6	0.6	0.6					Electricity ($/KW-h)	0.1		Capital charge factor (calculated)	0.188
Max size per equipment	2750 m3	3000 KW	100 m2	9000 m3/h
Installation cost (% of PC)	30	50	50	50
Annual maintenance cost (% of PC)	10	10	10	10
* Note that SuperPro's built-in compressor capital cost here is 4 times the cost used in the NREL study.
Parameters for units
Fermenter		Compressor		Condenser		Centrifuge
Temperature (C)	30	Max outlet temperature (C)	40	Pressure (atm)	1	Limiting oil globule diameter (μm)	20
Pressure (atm)	1	Pressure change (atm)	2	Heat transfer coefficient (W/m2-K)	860	Bulk liquid density (g/L)	1000
Specific power (kW/m3)	0.3	Efficiency (%)	70	Heat transfer efficiency (%)	90	Bulk liquid viscosity (cP)	1.5
Working to vessel volume ratio (%)	90	Labor (labor hrs/hr)	0.05	Temperature difference factor	1	Efficiency (%)	30
Labor (labor hrs/hr)	1			Labor (labor hrs/hr)	0	Product removal (%)	100
						Cells removal (%)	95
						Power dissipation to heat (50%)	50
						Labor (labor hrs/hr)	1
						* Note that the separation cost may become more important when a product’s oil globule size is very small and the density is close to water, which can lead to a smaller globule rising velocity in the decanter and thus larger equipment size.

## Sheet: T-P relations
* Most data comes from Perry's Handbook; no Antoine data is found directly for limonene for <25 C; 0,0 is read from the lim curve https://conference.ifas.ufl.edu/citrus12/PDF%20Presentations/Thurs-pdf/1610%20Milla.pdf
T (C)	T (K)	P (mm Hg)	Real P (Pa)	Predict P
0	273.15	0	0.001	3.86629
14	287.15	1	133.322	107.53
20	293.15	1.4	186.651	176.421
25	298.15	1.5	199.984	252.503
40.4	313.55	5	666.612	652.137
53.8	326.95	10	1333.22	1330.21
68.2	341.35	20	2666.45	2649.08
84.3	357.45	40	5332.89	5317.87
94.6	367.75	60	7999.34	8025.48
108.3	381.45	100	13332.2	13379.3
128.5	401.65	200	26664.5	26593
151.4	424.55	400	53328.9	53362.9
175	448.15	760	101325	101319
* Be careful with the formula: it has to show enough decimals!

## Sheet: Heat map_VVM=0.01
							* 99999 denote scenarios where the corresponding configuration is infeasible
								Config 1	Config 2	Config 3	Infeasible
								Yield (g/g)
							Min $/kg	0.00144	0.006769	0.012078	0.017387	0.022696	0.028005	0.033314	0.038623	0.043932	0.049241	0.05455	0.059859	0.065168	0.070477	0.075786	0.081095	0.086404	0.091713	0.097022	0.102331	0.10764	0.112949	0.118258	0.123567	0.128876	0.134185	0.139494	0.144803	0.150112	0.155421	0.16073	0.166039	0.171348	0.176657	0.181966	0.187275	0.192584	0.197893	0.203202	0.208511	0.21382	0.219129
						concentration (wt%)	1	791.474	168.396	94.3884	65.5762	50.2433	40.7239	34.2385	29.5361	26.4999	23.6459	21.3474	19.4566	17.8739	16.5297	15.3737	14.3692	13.488	12.7089	12.0151	11.3932	10.8327	10.3249	9.86267	9.44017	9.05247	8.69546	8.36561	8.05996	7.77592	7.51129	7.26414	7.0328	6.81579	6.61183	6.41976	6.23859	6.0674	5.9054	5.75187	5.60615	5.46767	5.3359
							1.5	665.413	141.579	79.3589	55.1358	42.2452	34.8738	29.3209	25.2945	22.2412	19.8464	17.9177	16.3311	15.003	13.875	12.905	12.0621	11.3227	10.6689	10.0867	9.56491	9.09457	8.66845	8.28059	7.92606	7.60074	7.30116	7.02438	6.7679	6.52956	6.3075	6.10012	5.90599	5.7239	5.55275	5.39158	5.23956	5.09591	4.95997	4.83114	4.70887	4.59267	4.4821
							2	0	0	0	0	0	0	0	0	0	17.9388	16.1958	14.7619	13.5617	12.5422	11.6656	10.9038	10.2356	9.64478	9.1186	8.64702	8.22196	7.83685	7.48632	7.16592	6.87191	6.60117	6.35103	6.11924	5.90384	5.70315	5.51573	5.34029	5.17572	5.02105	4.87539	4.738	4.60818	4.48533	4.3689	4.25839	4.15338	4.05345
							2.5	0	0	0	0	0	0	0	0	0	0	0	0	0	0	0	0	0	0	0	8.09444	7.69663	7.33622	7.00817	6.7083	6.43315	6.17976	5.94566	5.72873	5.52715	5.33933	5.16392	4.99973	4.84571	4.70096	4.56464	4.43606	4.31456	4.19959	4.09062	3.9872	3.88892	3.7954
							3	0	0	0	0	0	0	0	0	0	0	0	0	0	0	0	0	0	0	0	0	0	0	0	0	0	0	5.67464	5.46764	5.27529	5.09608	4.92871	4.77204	4.62507	4.48694	4.35688	4.23418	4.11825	4.00854	3.90457	3.80589	3.7121	3.62287
							3.5	0	0	0	0	0	0	0	0	0	0	0	0	0	0	0	0	0	0	0	0	0	0	0	0	0	0	0	0	0	0	0	4.60898	4.46707	4.33369	4.20809	4.08961	3.97767	3.87173	3.77133	3.67604	3.58548	3.49932
							4	0	0	0	0	0	0	0	0	0	0	0	0	0	0	0	0	0	0	0	0	0	0	0	0	0	0	0	0	0	0	0	0	0	0	0	3.98094	3.87199	3.76889	3.67117	3.57843	3.4903	3.40644
							4.5	0	0	0	0	0	0	0	0	0	0	0	0	0	0	0	0	0	0	0	0	0	0	0	0	0	0	0	0	0	0	0	0	0	0	0	0	0	0	3.5931	3.50235	3.41611	3.33404
							5	0	0	0	0	0	0	0	0	0	0	0	0	0	0	0	0	0	0	0	0	0	0	0	0	0	0	0	0	0	0	0	0	0	0	0	0	0	0	0	0	3.35664	3.27601
							5.5	0	0	0	0	0	0	0	0	0	0	0	0	0	0	0	0	0	0	0	0	0	0	0	0	0	0	0	0	0	0	0	0	0	0	0	0	0	0	0	0	0	0
							6	0	0	0	0	0	0	0	0	0	0	0	0	0	0	0	0	0	0	0	0	0	0	0	0	0	0	0	0	0	0	0	0	0	0	0	0	0	0	0	0	0	0
							6.5	0	0	0	0	0	0	0	0	0	0	0	0	0	0	0	0	0	0	0	0	0	0	0	0	0	0	0	0	0	0	0	0	0	0	0	0	0	0	0	0	0	0
							7	0	0	0	0	0	0	0	0	0	0	0	0	0	0	0	0	0	0	0	0	0	0	0	0	0	0	0	0	0	0	0	0	0	0	0	0	0	0	0	0	0	0
							7.5	0	0	0	0	0	0	0	0	0	0	0	0	0	0	0	0	0	0	0	0	0	0	0	0	0	0	0	0	0	0	0	0	0	0	0	0	0	0	0	0	0	0
							8	0	0	0	0	0	0	0	0	0	0	0	0	0	0	0	0	0	0	0	0	0	0	0	0	0	0	0	0	0	0	0	0	0	0	0	0	0	0	0	0	0	0
							8.5	0	0	0	0	0	0	0	0	0	0	0	0	0	0	0	0	0	0	0	0	0	0	0	0	0	0	0	0	0	0	0	0	0	0	0	0	0	0	0	0	0	0
							9	0	0	0	0	0	0	0	0	0	0	0	0	0	0	0	0	0	0	0	0	0	0	0	0	0	0	0	0	0	0	0	0	0	0	0	0	0	0	0	0	0	0
							9.5	0	0	0	0	0	0	0	0	0	0	0	0	0	0	0	0	0	0	0	0	0	0	0	0	0	0	0	0	0	0	0	0	0	0	0	0	0	0	0	0	0	0
							10	0	0	0	0	0	0	0	0	0	0	0	0	0	0	0	0	0	0	0	0	0	0	0	0	0	0	0	0	0	0	0	0	0	0	0	0	0	0	0	0	0	0
							10.5	0	0	0	0	0	0	0	0	0	0	0	0	0	0	0	0	0	0	0	0	0	0	0	0	0	0	0	0	0	0	0	0	0	0	0	0	0	0	0	0	0	0
							11	0	0	0	0	0	0	0	0	0	0	0	0	0	0	0	0	0	0	0	0	0	0	0	0	0	0	0	0	0	0	0	0	0	0	0	0	0	0	0	0	0	0
							11.5	0	0	0	0	0	0	0	0	0	0	0	0	0	0	0	0	0	0	0	0	0	0	0	0	0	0	0	0	0	0	0	0	0	0	0	0	0	0	0	0	0	0
							12	0	0	0	0	0	0	0	0	0	0	0	0	0	0	0	0	0	0	0	0	0	0	0	0	0	0	0	0	0	0	0	0	0	0	0	0	0	0	0	0	0	0
							12.5	0	0	0	0	0	0	0	0	0	0	0	0	0	0	0	0	0	0	0	0	0	0	0	0	0	0	0	0	0	0	0	0	0	0	0	0	0	0	0	0	0	0
							13	0	0	0	0	0	0	0	0	0	0	0	0	0	0	0	0	0	0	0	0	0	0	0	0	0	0	0	0	0	0	0	0	0	0	0	0	0	0	0	0	0	0
							13.5	0	0	0	0	0	0	0	0	0	0	0	0	0	0	0	0	0	0	0	0	0	0	0	0	0	0	0	0	0	0	0	0	0	0	0	0	0	0	0	0	0	0
							14	0	0	0	0	0	0	0	0	0	0	0	0	0	0	0	0	0	0	0	0	0	0	0	0	0	0	0	0	0	0	0	0	0	0	0	0	0	0	0	0	0	0
							14.5	0	0	0	0	0	0	0	0	0	0	0	0	0	0	0	0	0	0	0	0	0	0	0	0	0	0	0	0	0	0	0	0	0	0	0	0	0	0	0	0	0	0
							15	0	0	0	0	0	0	0	0	0	0	0	0	0	0	0	0	0	0	0	0	0	0	0	0	0	0	0	0	0	0	0	0	0	0	0	0	0	0	0	0	0	0
							15.5	0	0	0	0	0	0	0	0	0	0	0	0	0	0	0	0	0	0	0	0	0	0	0	0	0	0	0	0	0	0	0	0	0	0	0	0	0	0	0	0	0	0
							16	0	0	0	0	0	0	0	0	0	0	0	0	0	0	0	0	0	0	0	0	0	0	0	0	0	0	0	0	0	0	0	0	0	0	0	0	0	0	0	0	0	0
							16.5	0	0	0	0	0	0	0	0	0	0	0	0	0	0	0	0	0	0	0	0	0	0	0	0	0	0	0	0	0	0	0	0	0	0	0	0	0	0	0	0	0	0
							17	0	0	0	0	0	0	0	0	0	0	0	0	0	0	0	0	0	0	0	0	0	0	0	0	0	0	0	0	0	0	0	0	0	0	0	0	0	0	0	0	0	0
							17.5	0	0	0	0	0	0	0	0	0	0	0	0	0	0	0	0	0	0	0	0	0	0	0	0	0	0	0	0	0	0	0	0	0	0	0	0	0	0	0	0	0	0
							18	0	0	0	0	0	0	0	0	0	0	0	0	0	0	0	0	0	0	0	0	0	0	0	0	0	0	0	0	0	0	0	0	0	0	0	0	0	0	0	0	0	0
							18.5	0	0	0	0	0	0	0	0	0	0	0	0	0	0	0	0	0	0	0	0	0	0	0	0	0	0	0	0	0	0	0	0	0	0	0	0	0	0	0	0	0	0
							19	0	0	0	0	0	0	0	0	0	0	0	0	0	0	0	0	0	0	0	0	0	0	0	0	0	0	0	0	0	0	0	0	0	0	0	0	0	0	0	0	0	0
							19.5	0	0	0	0	0	0	0	0	0	0	0	0	0	0	0	0	0	0	0	0	0	0	0	0	0	0	0	0	0	0	0	0	0	0	0	0	0	0	0	0	0	0
							20	0	0	0	0	0	0	0	0	0	0	0	0	0	0	0	0	0	0	0	0	0	0	0	0	0	0	0	0	0	0	0	0	0	0	0	0	0	0	0	0	0	0
							20.5	0	0	0	0	0	0	0	0	0	0	0	0	0	0	0	0	0	0	0	0	0	0	0	0	0	0	0	0	0	0	0	0	0	0	0	0	0	0	0	0	0	0
							21	0	0	0	0	0	0	0	0	0	0	0	0	0	0	0	0	0	0	0	0	0	0	0	0	0	0	0	0	0	0	0	0	0	0	0	0	0	0	0	0	0	0
							21.5	0	0	0	0	0	0	0	0	0	0	0	0	0	0	0	0	0	0	0	0	0	0	0	0	0	0	0	0	0	0	0	0	0	0	0	0	0	0	0	0	0	0
							22	0	0	0	0	0	0	0	0	0	0	0	0	0	0	0	0	0	0	0	0	0	0	0	0	0	0	0	0	0	0	0	0	0	0	0	0	0	0	0	0	0	0
							22.5	0	0	0	0	0	0	0	0	0	0	0	0	0	0	0	0	0	0	0	0	0	0	0	0	0	0	0	0	0	0	0	0	0	0	0	0	0	0	0	0	0	0
							23	0	0	0	0	0	0	0	0	0	0	0	0	0	0	0	0	0	0	0	0	0	0	0	0	0	0	0	0	0	0	0	0	0	0	0	0	0	0	0	0	0	0
							23.5	0	0	0	0	0	0	0	0	0	0	0	0	0	0	0	0	0	0	0	0	0	0	0	0	0	0	0	0	0	0	0	0	0	0	0	0	0	0	0	0	0	0
							24	0	0	0	0	0	0	0	0	0	0	0	0	0	0	0	0	0	0	0	0	0	0	0	0	0	0	0	0	0	0	0	0	0	0	0	0	0	0	0	0	0	0
							24.5	0	0	0	0	0	0	0	0	0	0	0	0	0	0	0	0	0	0	0	0	0	0	0	0	0	0	0	0	0	0	0	0	0	0	0	0	0	0	0	0	0	0
							25	0	0	0	0	0	0	0	0	0	0	0	0	0	0	0	0	0	0	0	0	0	0	0	0	0	0	0	0	0	0	0	0	0	0	0	0	0	0	0	0	0	0
							25.5	0	0	0	0	0	0	0	0	0	0	0	0	0	0	0	0	0	0	0	0	0	0	0	0	0	0	0	0	0	0	0	0	0	0	0	0	0	0	0	0	0	0
							26	0	0	0	0	0	0	0	0	0	0	0	0	0	0	0	0	0	0	0	0	0	0	0	0	0	0	0	0	0	0	0	0	0	0	0	0	0	0	0	0	0	0
							26.5	0	0	0	0	0	0	0	0	0	0	0	0	0	0	0	0	0	0	0	0	0	0	0	0	0	0	0	0	0	0	0	0	0	0	0	0	0	0	0	0	0	0
							27	0	0	0	0	0	0	0	0	0	0	0	0	0	0	0	0	0	0	0	0	0	0	0	0	0	0	0	0	0	0	0	0	0	0	0	0	0	0	0	0	0	0
							27.5	0	0	0	0	0	0	0	0	0	0	0	0	0	0	0	0	0	0	0	0	0	0	0	0	0	0	0	0	0	0	0	0	0	0	0	0	0	0	0	0	0	0
							28	0	0	0	0	0	0	0	0	0	0	0	0	0	0	0	0	0	0	0	0	0	0	0	0	0	0	0	0	0	0	0	0	0	0	0	0	0	0	0	0	0	0
							28.5	0	0	0	0	0	0	0	0	0	0	0	0	0	0	0	0	0	0	0	0	0	0	0	0	0	0	0	0	0	0	0	0	0	0	0	0	0	0	0	0	0	0
							29	0	0	0	0	0	0	0	0	0	0	0	0	0	0	0	0	0	0	0	0	0	0	0	0	0	0	0	0	0	0	0	0	0	0	0	0	0	0	0	0	0	0
							29.5	0	0	0	0	0	0	0	0	0	0	0	0	0	0	0	0	0	0	0	0	0	0	0	0	0	0	0	0	0	0	0	0	0	0	0	0	0	0	0	0	0	0
							30	0	0	0	0	0	0	0	0	0	0	0	0	0	0	0	0	0	0	0	0	0	0	0	0	0	0	0	0	0	0	0	0	0	0	0	0	0	0	0	0	0	0
							Config 1
							Row Labels	0.00144	0.006769	0.012078	0.017387	0.022696	0.028005	0.033314	0.038623	0.043932	0.049241	0.05455	0.059859	0.065168	0.070477	0.075786	0.081095	0.086404	0.091713	0.097022	0.102331	0.10764	0.112949	0.118258	0.123567	0.128876	0.134185	0.139494	0.144803	0.150112	0.155421	0.16073	0.166039	0.171348	0.176657	0.181966	0.187275	0.192584	0.197893	0.203202	0.208511	0.21382	0.219129
							1	791.474	168.396	94.3884	65.5762	50.2433	40.7239	34.2385	29.5361	28.1113	28.0637	28.0164	27.9693	27.9223	27.8755	27.8288	27.7823	27.736	27.6899	27.6439	27.5981	27.5524	27.5069	27.4616	27.4164	27.3714	27.3265	27.2818	27.2373	27.1929	27.1487	27.1046	27.0607	27.0169	26.9733	26.9299	26.8866	26.8434	26.8004	26.7575	26.7148	26.6723	26.6298
							1.5	665.413	141.579	79.3589	55.1358	42.2452	35.9328	35.839	35.7458	35.653	35.5608	35.4691	35.3778	35.2871	35.1969	35.1071	35.0178	34.929	34.8407	34.7529	34.6655	34.5786	34.4921	34.4061	34.3206	34.2355	34.1509	34.0667	33.9829	33.8996	33.8167	33.7342	33.6522	33.5706	33.4894	33.4086	33.3282	33.2483	33.1687	33.0896	33.0109	32.9325	32.8546
							2										43.1266	42.9762	42.8269	42.6787	42.5315	42.3854	42.2403	42.0963	41.9534	41.8114	41.6704	41.5304	41.3915	41.2534	41.1164	40.9803	40.8451	40.7109	40.5776	40.4452	40.3138	40.1832	40.0535	39.9247	39.7967	39.6696	39.5434	39.418	39.2934	39.1697	39.0468	38.9247	38.8034
							2.5																				48.6137	48.4092	48.2065	48.0056	47.8064	47.6089	47.4131	47.219	47.0265	46.8357	46.6465	46.4588	46.2728	46.0883	45.9053	45.7238	45.5438	45.3653	45.1883	45.0127	44.8385	44.6657	44.4943
							3																											53.5951	53.3345	53.0765	52.821	52.5681	52.3177	52.0698	51.8243	51.5812	51.3405	51.1021	50.866	50.6321	50.4005	50.171	49.9438
							3.5																																58.1956	57.8773	57.5626	57.2514	56.9437	56.6393	56.3383	56.0406	55.7462	55.455	55.1668
							4																																				62.3628	61.9873	61.6163	61.25	60.8881	60.5306	60.1774
							4.5																																							66.2709	65.8375	65.4099	64.9881
							5																																									70.1043	69.6107
							5.5
							6
							6.5
							7
							7.5
							8
							8.5
							9
							9.5
							10
							10.5
							11
							11.5
							12
							12.5
							13
							13.5
							14
							14.5
							15
							15.5
							16
							16.5
							17
							17.5
							18
							18.5
							19
							19.5
							20
							20.5
							21
							21.5
							22
							22.5
							23
							23.5
							24
							24.5
							25
							25.5
							26
							26.5
							27
							27.5
							28
							28.5
							29
							29.5
							30
							Config 3
							Row Labels	0.00144	0.006769	0.012078	0.017387	0.022696	0.028005	0.033314	0.038623	0.043932	0.049241	0.05455	0.059859	0.065168	0.070477	0.075786	0.081095	0.086404	0.091713	0.097022	0.102331	0.10764	0.112949	0.118258	0.123567	0.128876	0.134185	0.139494	0.144803	0.150112	0.155421	0.16073	0.166039	0.171348	0.176657	0.181966	0.187275	0.192584	0.197893	0.203202	0.208511	0.21382	0.219129
							1	99999	99999	99999	99999	99999	99999	99999	99999	365.093	142.372	88.432	64.1362	50.3145	41.3949	35.1623	30.5614	27.0256	24.2235	21.9481	20.0637	18.4775	17.1239	15.9552	14.9359	14.0392	13.2442	12.5344	11.897	11.3213	10.7988	10.3225	9.88645	9.48582	9.11644	8.77479	8.45786	8.16306	7.88816	7.6312	7.39049	7.16452	6.95199
							1.5	99999	99999	99999	99999	99999	764.243	153.703	85.4497	59.1764	45.262	36.6465	30.7873	26.544	23.3292	20.8093	18.781	17.1133	15.7178	14.5329	13.5143	12.6293	11.8532	11.167	10.5561	10.0086	9.51516	9.06818	8.66137	8.28955	7.94839	7.63426	7.34406	7.07515	6.82528	6.5925	6.3751	6.17162	5.98075	5.80137	5.63246	5.47313	5.32259
							2										30.9285	26.2149	22.7486	20.0924	17.992	16.2895	14.8816	13.6979	12.6888	11.8184	11.0598	10.3929	9.80192	9.27464	8.80129	8.37398	7.98631	7.63301	7.30971	7.01274	6.739	6.48588	6.25113	6.03281	5.82927	5.63905	5.46089	5.29367	5.13641	4.98826	4.84844	4.71626	4.59113
							2.5																				9.77313	9.21057	8.70936	8.25997	7.85476	7.48753	7.15317	6.84745	6.56686	6.3084	6.06957	5.84821	5.64247	5.45076	5.27167	5.10402	4.94673	4.79888	4.65964	4.52828	4.40414	4.28665	4.1753
							3																											6.35148	6.09675	5.86172	5.64418	5.44226	5.25432	5.07898	4.91499	4.7613	4.61696	4.48114	4.35311	4.23222	4.11789	4.0096	3.90688
							3.5																																4.98508	4.82082	4.66707	4.52287	4.38733	4.25972	4.13934	4.02561	3.91799	3.816	3.7192
							4																																				4.21818	4.09652	3.9817	3.87317	3.77043	3.67302	3.58053
							4.5																																							3.75602	3.65699	3.56306	3.47387
							5																																									3.47585	3.38924
							5.5
							6
							6.5
							7
							7.5
							8
							8.5
							9
							9.5
							10
							10.5
							11
							11.5
							12
							12.5
							13
							13.5
							14
							14.5
							15
							15.5
							16
							16.5
							17
							17.5
							18
							18.5
							19
							19.5
							20
							20.5
							21
							21.5
							22
							22.5
							23
							23.5
							24
							24.5
							25
							25.5
							26
							26.5
							27
							27.5
							28
							28.5
							29
							29.5
							30
							Config 2
							Row Labels	0.00144	0.006769	0.012078	0.017387	0.022696	0.028005	0.033314	0.038623	0.043932	0.049241	0.05455	0.059859	0.065168	0.070477	0.075786	0.081095	0.086404	0.091713	0.097022	0.102331	0.10764	0.112949	0.118258	0.123567	0.128876	0.134185	0.139494	0.144803	0.150112	0.155421	0.16073	0.166039	0.171348	0.176657	0.181966	0.187275	0.192584	0.197893	0.203202	0.208511	0.21382	0.219129
							1	807.607	171.829	96.3127	66.9132	51.2679	41.5544	34.9368	30.1385	26.4999	23.6459	21.3474	19.4566	17.8739	16.5297	15.3737	14.3692	13.488	12.7089	12.0151	11.3932	10.8327	10.3249	9.86267	9.44017	9.05247	8.69546	8.36561	8.05996	7.77592	7.51129	7.26414	7.0328	6.81579	6.61183	6.41976	6.23859	6.0674	5.9054	5.75187	5.60615	5.46767	5.3359
							1.5	677.685	144.19	80.8227	56.153	43.0246	34.8738	29.3209	25.2945	22.2412	19.8464	17.9177	16.3311	15.003	13.875	12.905	12.0621	11.3227	10.6689	10.0867	9.56491	9.09457	8.66845	8.28059	7.92606	7.60074	7.30116	7.02438	6.7679	6.52956	6.3075	6.10012	5.90599	5.7239	5.55275	5.39158	5.23956	5.09591	4.95997	4.83114	4.70887	4.59267	4.4821
							2										17.9388	16.1958	14.7619	13.5617	12.5422	11.6656	10.9038	10.2356	9.64478	9.1186	8.64702	8.22196	7.83685	7.48632	7.16592	6.87191	6.60117	6.35103	6.11924	5.90384	5.70315	5.51573	5.34029	5.17572	5.02105	4.87539	4.738	4.60818	4.48533	4.3689	4.25839	4.15338	4.05345
							2.5																				8.09444	7.69663	7.33622	7.00817	6.7083	6.43315	6.17976	5.94566	5.72873	5.52715	5.33933	5.16392	4.99973	4.84571	4.70096	4.56464	4.43606	4.31456	4.19959	4.09062	3.9872	3.88892	3.7954
							3																											5.67464	5.46764	5.27529	5.09608	4.92871	4.77204	4.62507	4.48694	4.35688	4.23418	4.11825	4.00854	3.90457	3.80589	3.7121	3.62287
							3.5																																4.60898	4.46707	4.33369	4.20809	4.08961	3.97767	3.87173	3.77133	3.67604	3.58548	3.49932
							4																																				3.98094	3.87199	3.76889	3.67117	3.57843	3.4903	3.40644
							4.5																																							3.5931	3.50235	3.41611	3.33404
							5																																									3.35664	3.27601
							5.5
							6
							6.5
							7
							7.5
							8
							8.5
							9
							9.5
							10
							10.5
							11
							11.5
							12
							12.5
							13
							13.5
							14
							14.5
							15
							15.5
							16
							16.5
							17
							17.5
							18
							18.5
							19
							19.5
							20
							20.5
							21
							21.5
							22
							22.5
							23
							23.5
							24
							24.5
							25
							25.5
							26
							26.5
							27
							27.5
							28
							28.5
							29
							29.5
							30
[truncated: 19 more columns]

## Sheet: VVM=0.1
							* 99999 denote scenarios where the corresponding configuration is infeasible
								Config 1	Config 2	Config 3	Infeasible
								Yield (g/g)
							Min $/kg	0.00144	0.006769	0.012078	0.017387	0.022696	0.028005	0.033314	0.038623	0.043932	0.049241	0.05455	0.059859	0.065168	0.070477	0.075786	0.081095	0.086404	0.091713	0.097022	0.102331	0.10764	0.112949	0.118258	0.123567	0.128876	0.134185	0.139494	0.144803	0.150112	0.155421	0.16073	0.166039	0.171348	0.176657	0.181966	0.187275	0.192584	0.197893	0.203202	0.208511	0.21382	0.219129
						concentration (wt%)	1	1135.58	241.604	135.419	94.0804	72.0813	58.423	49.118	42.371	37.2548	33.2417	30.0098	27.3512	25.1258	23.2356	21.6103	20.1977	18.9588	17.8633	16.8877	16.0133	15.2251	14.5111	13.8612	13.2671	12.7219	12.2199	11.7562	11.3264	10.927	10.5549	10.2074	9.88209	9.57696	9.29016	9.0201	8.76536	8.52465	8.29687	8.08098	7.87609	7.68137	7.49609
							1.5	894.899	190.403	106.724	74.1471	56.8107	46.0473	38.7145	33.3976	29.3657	26.2033	23.6564	21.5613	19.8075	18.318	17.0371	15.924	14.9476	14.0843	13.3155	12.6264	12.0054	11.4427	10.9305	10.4623	10.0327	9.63711	9.27163	8.93294	8.61821	8.32498	8.05112	7.79477	7.55431	7.3283	7.11548	6.91473	6.72505	6.54554	6.37541	6.21395	6.0605	5.91449
							2	774.544	164.799	92.3749	64.1792	49.1745	39.8588	33.5122	28.9104	25.4208	22.6836	20.4793	18.666	17.1481	15.8589	14.7503	13.7869	12.9418	12.1946	11.5292	10.9328	10.3953	9.90825	9.46496	9.05976	8.68794	8.34555	8.02922	7.73608	7.46368	7.20989	6.97286	6.75099	6.54287	6.34726	6.16307	5.98931	5.82514	5.66978	5.52253	5.39818	5.31594	5.18799
							2.5	702.323	149.435	83.7644	58.1979	44.5923	36.1453	30.3905	26.2178	23.0535	20.5717	18.5729	16.9286	15.5523	14.3833	13.3781	12.5045	11.7382	11.0607	10.4573	9.91656	9.42913	8.98752	8.58557	8.21815	7.881	7.57054	7.2837	7.0179	6.7709	6.54077	6.32585	6.12467	6.00631	5.82684	5.65785	5.49845	5.34783	5.20529	5.0702	4.94199	4.82015	4.70421
							3	654.172	139.192	78.0236	54.21	41.5373	33.6694	28.3091	24.4225	21.4753	19.1635	17.3018	15.7703	14.4883	13.3995	12.4632	11.6495	10.9358	10.3047	9.74269	9.23899	8.78498	8.37365	7.99926	7.65703	7.343	7.05382	6.84685	6.61218	6.37956	6.16282	5.96041	5.77094	5.59321	5.42616	5.26886	5.12048	4.98028	4.84761	4.72186	4.60252	4.4891	4.38118
							3.5	619.776	131.874	73.9227	51.3613	39.3549	31.9007	26.8224	23.1401	20.3478	18.1577	16.3938	14.9428	13.7283	12.6967	11.8096	11.0387	10.3625	9.76465	9.23219	8.75498	8.32484	7.93514	7.58043	7.33284	7.0322	6.75535	6.49957	6.26254	6.04228	5.83707	5.64542	5.46602	5.29774	5.13957	4.99063	4.85014	4.71739	4.59177	4.47271	4.35971	4.25232	4.15014
							4	593.977	126.386	70.8468	49.2246	37.7181	30.5742	25.7072	22.1783	19.5022	17.4032	15.7128	14.3222	13.1582	12.1696	11.3194	10.5806	9.93258	9.35958	8.84929	8.39195	8.05951	7.68232	7.33899	7.02517	6.7372	6.47202	6.22702	5.99999	5.78901	5.59245	5.40888	5.23704	5.07586	4.92436	4.7817	4.64713	4.51998	4.39965	4.28561	4.17737	4.07452	3.97664
							4.5	573.909	122.117	68.4543	47.5627	36.4449	29.5423	24.8398	21.4301	18.8445	16.8164	15.1831	13.8395	12.7148	11.7595	10.9381	10.2243	9.59816	9.04452	8.63261	8.18655	7.78449	7.42022	7.08866	6.78559	6.50749	6.2514	6.0148	5.79555	5.5918	5.40198	5.2247	5.05875	4.90309	4.75678	4.61901	4.48905	4.36626	4.25005	4.13992	4.0354	3.93606	3.84154
							5	557.854	118.702	66.5402	46.233	35.4262	28.7168	24.1459	20.8315	18.3182	16.3469	14.7593	13.4533	12.36	11.4315	10.6331	9.93922	9.41481	8.87182	8.38826	7.95487	7.56423	7.21032	6.88818	6.59373	6.32353	6.07472	5.84484	5.63182	5.43387	5.24944	5.07719	4.91596	4.76473	4.62258	4.48872	4.36246	4.24315	4.13025	4.02325	3.92169	3.82518	3.73335
							5.5	544.718	115.907	64.974	45.145	34.5928	28.0414	23.578	20.3418	17.8876	15.9627	14.4125	13.1372	12.0698	11.1631	10.4728	9.78946	9.19009	8.66011	8.18813	7.76513	7.38385	7.03842	6.724	6.43659	6.17287	5.93002	5.70565	5.49773	5.30452	5.12451	4.95639	4.79902	4.65141	4.51266	4.38202	4.25878	4.14233	4.03213	3.92769	3.82857	3.73438	3.64474
							6	533.77	113.578	63.6688	44.2383	33.8982	27.4784	23.1048	19.9336	17.5288	15.6426	14.1235	12.8739	11.8279	11.0293	10.2591	9.58975	9.00265	8.48352	8.02121	7.60686	7.23339	6.89503	6.58704	6.30553	6.0472	5.80932	5.58955	5.38589	5.19663	5.02031	4.85563	4.70148	4.55689	4.42099	4.29301	4.1723	4.05824	3.95029	3.84799	3.7509	3.65863	3.57083
							6.5	524.506	111.607	62.5643	43.4711	33.3104	27.0021	22.7044	19.5882	17.2252	15.3717	13.879	12.651	11.7145	10.8347	10.0781	9.42061	8.84391	8.33397	7.87984	7.47283	7.10597	6.77359	6.47106	6.19453	5.94078	5.7071	5.49122	5.29116	5.10526	4.93206	4.77029	4.61888	4.47684	4.34334	4.21764	4.09906	3.98701	3.88098	3.78049	3.68512	3.59448	3.50824
							7	516.565	109.918	61.6175	42.8135	32.8066	26.5938	22.3612	19.2922	16.9649	15.1395	13.6694	12.5539	11.534	10.6677	9.92286	9.27552	8.70773	8.20567	7.75856	7.35784	6.99665	6.66942	6.37156	6.0993	5.84948	5.61942	5.40687	5.20991	5.02687	4.85635	4.69709	4.54801	4.40817	4.27674	4.15297	4.03623	3.92592	3.82152	3.72259	3.62869	3.53945	3.45454
							7.5	509.683	108.454	60.797	42.2435	32.3699	26.2399	22.0637	19.0356	16.7393	14.9382	13.4877	12.3834	11.3774	10.5229	9.7882	9.14967	8.58961	8.0944	7.65337	7.25811	6.90184	6.57906	6.28526	6.01671	5.77029	5.54336	5.33371	5.13943	4.95889	4.79068	4.63359	4.48655	4.34861	4.21897	4.09689	3.98173	3.87292	3.76995	3.67236	3.57974	3.49172	3.40797
							8	503.66	107.173	60.079	41.7447	31.9878	25.9303	21.8034	18.811	16.5419	14.7621	13.4214	12.2341	11.2402	10.3961	9.67028	9.03947	8.48619	7.99695	7.56126	7.17078	6.81882	6.49994	6.2097	5.94439	5.70094	5.47676	5.26964	5.07771	4.89935	4.73318	4.57799	4.43272	4.29645	4.16838	4.04778	3.93401	3.82652	3.72479	3.62838	3.53688	3.44993	3.36718
							8.5	498.346	106.042	59.4454	41.3046	31.6507	25.657	21.5737	18.6129	16.3677	14.7044	13.2767	12.1022	11.1191	10.2842	9.56616	8.94217	8.39486	7.91091	7.47993	7.09367	6.74551	6.43008	6.14297	5.88053	5.63971	5.41795	5.21307	5.02321	4.84679	4.68241	4.52889	4.3852	4.2504	4.12371	4.00441	3.89187	3.78554	3.68492	3.58955	3.49904	3.41302	3.33117
							9	493.622	105.037	58.8822	40.9133	31.351	25.4141	21.3695	18.4368	16.2129	14.5619	13.148	11.985	11.0114	10.1846	9.47354	8.85561	8.31362	7.83438	7.40759	7.02508	6.6803	6.36793	6.08361	5.82372	5.58525	5.36564	5.16275	4.97474	4.80003	4.63725	4.48522	4.34292	4.20944	4.08398	3.96583	3.85439	3.74909	3.64945	3.55501	3.46537	3.38019	3.29914
							9.5	489.396	104.138	58.3783	40.5633	31.0828	25.1968	21.1868	18.2792	16.1743	14.4342	13.0328	11.88	10.915	10.0954	9.39061	8.77812	8.24089	7.76586	7.34281	6.96366	6.62191	6.31229	6.03047	5.77286	5.53648	5.31881	5.1177	4.93134	4.75816	4.59681	4.44612	4.30507	4.17276	4.0484	3.9313	3.82083	3.71646	3.61769	3.52408	3.43523	3.3508	3.27046
							10	485.591	103.329	57.9247	40.2482	30.8414	25.0012	21.0224	18.1374	16.0455	14.3193	12.9291	11.7854	10.8281	10.0151	9.31593	8.70832	8.17538	7.70414	7.28448	6.90835	6.56933	6.26218	5.98261	5.72706	5.49257	5.27663	5.07712	4.89225	4.72045	4.5604	4.41091	4.27098	4.13973	4.01636	3.90019	3.79061	3.68707	3.58909	3.49622	3.40809	3.32433	3.24463
							10.5	482.149	102.597	57.5143	39.9632	30.623	24.8242	20.8736	18.0091	15.9289	14.2152	12.8351	11.6998	10.7495	9.94238	9.24832	8.64514	8.11608	7.64827	7.23166	6.85828	6.52173	6.21682	5.93928	5.68559	5.45281	5.23844	5.04039	4.85687	4.68632	4.52743	4.37903	4.24012	4.10982	3.98735	3.87203	3.76325	3.66046	3.56319	3.47101	3.38351	3.30036	3.22124
							11	479.02	101.931	57.1413	39.704	30.4245	24.6633	20.7383	17.993	15.8228	14.1206	12.7497	11.622	10.678	9.87624	9.18682	8.58766	8.06214	7.59745	7.18362	6.81273	6.47843	6.17555	5.89987	5.64787	5.41664	5.2037	5.00698	4.82468	4.65527	4.49744	4.35003	4.21205	4.08262	3.96097	3.84642	3.73836	3.63626	3.53964	3.44807	3.36116	3.27856	3.19997
							11.5	476.163	101.323	56.8006	39.4674	30.2432	24.5164	20.6148	17.8827	15.7259	14.0341	12.6716	11.5508	10.6127	9.81582	9.13063	8.53515	8.01285	7.55102	7.13973	6.77112	6.43887	6.13785	5.86386	5.61341	5.3836	5.17197	4.97645	4.79527	4.6269	4.47004	4.32354	4.1864	4.05777	3.93686	3.82302	3.71562	3.61415	3.51812	3.42711	3.34074	3.25865	3.18054
							12	473.543	100.766	56.4883	39.2504	30.077	24.3817	20.5016	17.7816	15.637	13.9548	12.6	11.4856	10.5527	9.76041	9.0791	8.48699	7.96765	7.50844	7.09948	6.73295	6.40258	6.10327	5.83083	5.5818	5.35329	5.14286	4.94845	4.7683	4.60088	4.44491	4.29924	4.16288	4.03497	3.91476	3.80155	3.69477	3.59387	3.49839	3.40789	3.322	3.24038	3.16272
							12.5	471.134	100.253	56.201	39.0509	29.9242	24.2578	20.5019	17.6885	15.5551	13.8818	12.5341	11.4255	10.4976	9.7094	9.03166	8.44266	7.92604	7.46924	7.06242	6.69782	6.36918	6.07144	5.80043	5.55271	5.3254	5.11607	4.92268	4.74347	4.57693	4.42178	4.27687	4.14123	4.01399	3.8944	3.78179	3.67557	3.5752	3.48022	3.3902	3.30476	3.22357	3.14631
							13	468.909	99.7801	55.9358	38.8666	29.783	24.1434	20.4022	17.6026	15.4796	13.8143	12.4733	11.3701	10.4466	9.66228	8.98785	8.40172	7.88761	7.43303	7.0282	6.66537	6.33833	6.04204	5.77235	5.52584	5.29963	5.09132	4.89887	4.72054	4.55481	4.40041	4.25621	4.12123	3.99461	3.87561	3.76355	3.65784	3.55796	3.46344	3.37386	3.28884	3.20804	3.13116
							13.5	466.849	99.3419	55.6902	38.696	29.6523	24.0375	20.3099	17.5229	15.4095	13.7519	12.4169	11.3187	10.3994	9.61864	8.94726	8.36378	7.85201	7.39949	6.99649	6.63531	6.30976	6.01481	5.74634	5.50094	5.27576	5.0684	4.87682	4.69929	4.53432	4.38062	4.23707	4.1027	3.97666	3.85819	3.74664	3.64141	3.54199	3.44789	3.35872	3.27408	3.19365	3.11712
							14	464.937	98.935	55.4622	38.5376	29.531	23.9392	20.2241	17.4489	15.3445	13.6938	12.3645	11.2709	10.3556	9.57809	8.90955	8.32854	7.81894	7.36833	6.96704	6.60738	6.28321	5.9895	5.72217	5.47781	5.25359	5.0471	4.85634	4.67956	4.51528	4.36223	4.21929	4.08549	3.95998	3.84202	3.73094	3.62615	3.52715	3.43345	3.34465	3.26038	3.18029	3.10408
							14.5	463.156	98.5561	55.2499	38.3902	29.418	23.9564	20.1442	17.38	15.2839	13.6398	12.3157	11.2265	10.3147	9.54031	8.87442	8.29572	7.78813	7.3393	6.9396	6.58137	6.25847	5.96594	5.69966	5.45627	5.23293	5.02726	4.83725	4.66117	4.49755	4.3451	4.20273	4.06946	3.94444	3.82695	3.71631	3.61194	3.51332	3.42	3.33155	3.24761	3.16783	3.09193
							15	461.494	98.2025	55.0517	38.2525	29.3126	23.8676	20.0696	17.3156	15.2273	13.5893	12.2701	11.1849	10.2766	9.50504	8.84162	8.26506	7.75936	7.3122	6.91398	6.55708	6.23538	5.94393	5.67864	5.43615	5.21364	5.00874	4.81943	4.644	4.48099	4.32911	4.18726	4.05449	3.92994	3.81287	3.70264	3.59866	3.50041	3.40744	3.31932	3.23569	3.15621	3.08058
							15.5	459.939	97.8717	54.8663	38.1237	29.2139	23.7846	19.9997	17.2554	15.1743	13.542	12.2275	11.1461	10.2409	9.47203	8.81092	8.23637	7.73243	7.28683	6.89	6.53434	6.21377	5.92333	5.65897	5.41732	5.19559	4.9914	4.80275	4.62794	4.46549	4.31414	4.17279	4.04047	3.91636	3.7997	3.68986	3.58624	3.48833	3.39568	3.30787	3.22453	3.14533	3.06996
							16	458.481	97.5616	54.6925	38.003	29.1214	23.7066	19.9342	17.1989	15.1247	13.4977	12.1875	11.1096	10.2074	9.44107	8.78213	8.20947	7.70718	7.26304	6.86751	6.51302	6.19349	5.90401	5.64051	5.39966	5.17866	4.97514	4.78711	4.61287	4.45095	4.3001	4.15921	4.02733	3.90362	3.78735	3.67786	3.57459	3.477	3.38465	3.29713	3.21406	3.13512	3.06
							16.5	457.111	97.2703	54.5292	37.8896	29.0345	23.6334	19.8727	17.1458	15.078	13.4561	12.1499	11.0753	10.1759	9.41197	8.75507	8.18418	7.68344	7.24068	6.84637	6.49297	6.17444	5.88585	5.62317	5.38307	5.16274	4.95985	4.7724	4.5987	4.43729	4.2869	4.14645	4.01498	3.89165	3.77574	3.66659	3.56363	3.46635	3.37429	3.28704	3.20423	3.12553	3.05064
							17	0	0	54.3755	37.7828	28.9527	23.5645	19.8147	17.0958	15.034	13.4169	12.1145	11.0431	10.1463	9.38457	8.72959	8.16036	7.66109	7.21962	6.82646	6.4741	6.1565	5.86875	5.60684	5.36744	5.14776	4.94546	4.75856	4.58537	4.42442	4.27448	4.13443	4.00335	3.88038	3.76481	3.65598	3.55332	3.45632	3.36453	3.27753	3.19496	3.1165	3.04183
							17.5	0	0	0	0	28.8756	23.4994	19.76	17.0486	14.9926	13.3799	12.0811	11.0127	10.1183	9.35872	8.70555	8.1379	7.64001	7.19976	6.80769	6.4563	6.13958	5.85263	5.59144	5.3527	5.13362	4.93188	4.7455	4.57279	4.41229	4.26275	4.1231	3.99238	3.86975	3.7545	3.64597	3.54359	3.44686	3.35532	3.26857	3.18623	3.10798	3.03352
							18	0	0	0	0	0	0	19.7084	17.0041	14.9534	13.3449	12.0495	10.9839	10.0919	9.3343	8.68284	8.11668	7.62009	7.18099	6.78995	6.43948	6.12359	5.83739	5.57688	5.33877	5.12027	4.91906	4.73316	4.5609	4.40082	4.25168	4.11239	3.98201	3.85971	3.74476	3.63651	3.5344	3.43793	3.34663	3.2601	3.17797	3.09993	3.02566
							18.5	0	0	0	0	0	0	0	16.9619	14.9163	13.3118	12.0197	10.9567	10.0669	9.31119	8.66135	8.09659	7.60124	7.16323	6.77316	6.42357	6.10845	5.82297	5.56311	5.32559	5.10763	4.90692	4.72149	4.54965	4.38997	4.2412	4.10226	3.9722	3.8502	3.73553	3.62756	3.52571	3.42947	3.3384	3.25208	3.17016	3.09231	3.01823
							19	0	0	0	0	0	0	0	0	0	13.2805	11.9914	10.9309	10.0432	9.28929	8.64098	8.07756	7.58337	7.1464	6.75725	6.40848	6.09411	5.8093	5.55006	5.31309	5.09565	4.89541	4.71042	4.53899	4.37969	4.23127	4.09265	3.9629	3.84119	3.7268	3.61908	3.51746	3.42145	3.33059	3.24448	3.16276	3.08509	3.01119
							19.5	0	0	0	0	0	0	0	0	0	0	11.9645	10.9064	10.0207	9.2685	8.62165	8.05949	7.56642	7.13043	6.74215	6.39416	6.0805	5.79633	5.53767	5.30124	5.08428	4.8845	4.69992	4.52887	4.36993	4.22184	4.08354	3.95408	3.83264	3.7185	3.61102	3.50964	3.41385	3.32319	3.23727	3.15573	3.07824	3.0045
							20	0	0	0	0	0	0	0	0	0	0	0	10.8832	9.99938	9.24874	8.60328	8.04232	7.5503	7.11524	6.7278	6.38056	6.06757	5.784	5.52589	5.28997	5.07348	4.87412	4.68994	4.51926	4.36065	4.21288	4.07487	3.94569	3.82451	3.71062	3.60337	3.5022	3.40661	3.31615	3.23042	3.14905	3.07172	2.99814
							20.5	0	0	0	0	0	0	0	0	0	0	0	0	0	9.22994	8.58579	8.02598	7.53497	7.1008	6.71414	6.36761	6.05526	5.77227	5.51469	5.27924	5.0632	4.86424	4.68044	4.51011	4.35182	4.20436	4.06663	3.93771	3.81678	3.70312	3.59609	3.49513	3.39973	3.30946	3.2239	3.1427	3.06553	2.9921
							21	0	0	0	0	0	0	0	0	0	0	0	0	0	0	8.56913	8.01041	7.52036	7.08703	6.70113	6.35527	6.04353	5.76109	5.50401	5.26903	5.0534	4.85484	4.67139	4.50139	4.34341	4.19623	4.05878	3.93011	3.80941	3.69597	3.58915	3.48839	3.39318	3.30308	3.21769	3.13664	3.05962	2.98634
							21.5	0	0	0	0	0	0	0	0	0	0	0	0	0	0	0	7.99557	7.50642	7.0739	6.68872	6.3435	6.03234	5.75043	5.49383	5.25928	5.04406	4.84586	4.66275	4.49307	4.33539	4.18849	4.05128	3.92286	3.80239	3.68916	3.58253	3.48196	3.38693	3.29699	3.21176	3.13087	3.05399	2.98084
							22	0	0	0	0	0	0	0	0	0	0	0	0	0	0	0	0	7.49311	7.06136	6.67687	6.33227	6.02166	5.74025	5.48411	5.24998	5.03513	4.83729	4.65451	4.48513	4.32773	4.18109	4.04413	3.91593	3.79567	3.68265	3.57621	3.47582	3.38095	3.29118	3.2061	3.12535	3.04861	2.97559
							22.5	0	0	0	0	0	0	0	0	0	0	0	0	0	0	0	0	0	7.04938	6.66554	6.32153	6.01145	5.73052	5.47481	5.24108	5.02661	4.8291	4.64663	4.47754	4.32041	4.17401	4.03729	3.90931	3.78926	3.67642	3.57017	3.46995	3.37525	3.28563	3.20069	3.12008	3.04347	2.97058
							23	0	0	0	0	0	0	0	0	0	0	0	0	0	0	0	0	0	0	6.6547	6.31125	6.00168	5.72121	5.46592	5.23257	5.01844	4.82126	4.63909	4.47028	4.3134	4.16725	4.03075	3.90297	3.78312	3.67047	3.56439	3.46433	3.36979	3.28031	3.19552	3.11504	3.03855	2.96578
							23.5	0	0	0	0	0	0	0	0	0	0	0	0	0	0	0	0	0	0	0	6.3014	5.99232	5.71229	5.4574	5.22442	5.01063	4.81376	4.63187	4.46332	4.30669	4.16077	4.02448	3.89691	3.77724	3.66477	3.55886	3.45895	3.36455	3.27522	3.19056	3.1102	3.03384	2.96118
							24	0	0	0	0	0	0	0	0	0	0	0	0	0	0	0	0	0	0	0	0	5.98335	5.70374	5.44924	5.2166	5.00313	4.80656	4.62495	4.45665	4.30026	4.15455	4.01847	3.89109	3.77161	3.6593	3.55355	3.4538	3.35954	3.27034	3.1858	3.10557	3.02932	2.95677
							24.5	0	0	0	0	0	0	0	0	0	0	0	0	0	0	0	0	0	0	0	0	0	5.69553	5.4414	5.2091	4.99594	4.79965	4.6183	4.45025	4.29409	4.14859	4.01271	3.88551	3.7662	3.65406	3.54846	3.44885	3.35473	3.26566	3.18124	3.10113	3.02499	2.95254
							25	0	0	0	0	0	0	0	0	0	0	0	0	0	0	0	0	0	0	0	0	0	0	5.43388	5.2019	4.98904	4.79302	4.61192	4.44411	4.28816	4.14286	4.00717	3.88015	3.761	3.64902	3.54357	3.4441	3.35011	3.26116	3.17686	3.09686	3.02083	2.94848
							25.5	0	0	0	0	0	0	0	0	0	0	0	0	0	0	0	0	0	0	0	0	0	0	0	5.19498	4.9824	4.78665	4.60579	4.4382	4.28246	4.13736	4.00185	3.875	3.75601	3.64418	3.53887	3.43953	3.34567	3.25684	3.17266	3.09276	3.01683	2.94458
							26	0	0	0	0	0	0	0	0	0	0	0	0	0	0	0	0	0	0	0	0	0	0	0	5.18832	4.97602	4.78052	4.5999	4.43252	4.27698	4.13207	3.99673	3.87005	3.75121	3.63952	3.53435	3.43514	3.34139	3.25268	3.16861	3.08881	3.01298	2.94082
							26.5	0	0	0	0	0	0	0	0	0	0	0	0	0	0	0	0	0	0	0	0	0	0	0	0	4.96988	4.77462	4.59422	4.42705	4.27171	4.12697	3.9918	3.86528	3.74659	3.63504	3.52999	3.43091	3.33728	3.24868	3.16471	3.08501	3.00928	2.93721
							27	0	0	0	0	0	0	0	0	0	0	0	0	0	0	0	0	0	0	0	0	0	0	0	0	0	4.76893	4.58875	4.42178	4.26662	4.12207	3.98706	3.86068	3.74214	3.63072	3.5258	3.42683	3.33332	3.24483	3.16096	3.08136	3.00571	2.93373
							27.5	0	0	0	0	0	0	0	0	0	0	0	0	0	0	0	0	0	0	0	0	0	0	0	0	0	4.76345	4.58348	4.4167	4.26173	4.11733	3.98248	3.85625	3.73785	3.62656	3.52176	3.42291	3.3295	3.24111	3.15734	3.07783	3.00227	2.93037
							28	0	0	0	0	0	0	0	0	0	0	0	0	0	0	0	0	0	0	0	0	0	0	0	0	0	0	4.5784	4.41181	4.257	4.11277	3.97807	3.85198	3.73371	3.62254	3.51786	3.41912	3.32582	3.23753	3.15385	3.07443	2.99895	2.92714
							28.5	0	0	0	0	0	0	0	0	0	0	0	0	0	0	0	0	0	0	0	0	0	0	0	0	0	0	0	4.40708	4.25244	4.10837	3.97381	3.84786	3.72971	3.61867	3.5141	3.41546	3.32227	3.23407	3.15048	3.07115	2.99575	2.92401
							29	0	0	0	0	0	0	0	0	0	0	0	0	0	0	0	0	0	0	0	0	0	0	0	0	0	0	0	4.40251	4.24804	4.10411	3.9697	3.84388	3.72585	3.61492	3.51047	3.41193	3.31883	3.23073	3.14722	3.06797	2.99266	2.92099
							29.5	0	0	0	0	0	0	0	0	0	0	0	0	0	0	0	0	0	0	0	0	0	0	0	0	0	0	0	0	4.24378	4.1	3.96572	3.84003	3.72212	3.61131	3.50696	3.40852	3.31551	3.2275	3.14408	3.06491	2.98967	2.91808
							30	0	0	0	0	0	0	0	0	0	0	0	0	0	0	0	0	0	0	0	0	0	0	0	0	0	0	0	0	0	4.09603	3.96188	3.83631	3.71852	3.60781	3.50356	3.40522	3.31231	3.22438	3.14104	3.06195	2.98678	2.91526
							Config 1
							Row Labels	0.00144	0.006769	0.012078	0.017387	0.022696	0.028005	0.033314	0.038623	0.043932	0.049241	0.05455	0.059859	0.065168	0.070477	0.075786	0.081095	0.086404	0.091713	0.097022	0.102331	0.10764	0.112949	0.118258	0.123567	0.128876	0.134185	0.139494	0.144803	0.150112	0.155421	0.16073	0.166039	0.171348	0.176657	0.181966	0.187275	0.192584	0.197893	0.203202	0.208511	0.21382	0.219129
							1	1135.58	241.604	135.419	94.0804	72.0813	58.423	49.118	42.371	37.2548	33.2417	30.0098	27.3512	25.1258	23.2356	21.6103	20.1977	18.9588	17.8633	16.8877	16.0133	15.2251	14.5111	13.8612	13.2671	12.7219	12.2199	11.7562	11.3264	10.927	10.5549	10.2074	9.88209	9.57696	9.29016	9.0201	8.76536	8.52465	8.29687	8.08098	7.87609	7.68137	7.49609
							1.5	894.899	190.403	106.724	74.1471	56.8107	46.0473	38.7145	33.3976	29.3657	26.2033	23.6564	21.5613	19.8075	18.318	17.0371	15.924	14.9476	14.0843	13.3155	12.6264	12.0054	11.4427	10.9305	10.4623	10.0327	9.63711	9.27163	8.93294	8.61821	8.32498	8.05112	7.79477	7.55431	7.3283	7.11548	6.91473	6.72505	6.54554	6.37541	6.21395	6.0605	5.91449
							2	774.544	164.799	92.3749	64.1792	49.1745	39.8588	33.5122	28.9104	25.4208	22.6836	20.4793	18.666	17.1481	15.8589	14.7503	13.7869	12.9418	12.1946	11.5292	10.9328	10.3953	9.90825	9.46496	9.05976	8.68794	8.34555	8.02922	7.73608	7.46368	7.20989	6.97286	6.75099	6.54287	6.34726	6.16307	5.98931	5.82514	5.66978	5.52253	5.39818	5.39651	5.39484
							2.5	702.323	149.435	83.7644	58.1979	44.5923	36.1453	30.3905	26.2178	23.0535	20.5717	18.5729	16.9286	15.5523	14.3833	13.3781	12.5045	11.7382	11.0607	10.4573	9.91656	9.42913	8.98752	8.58557	8.21815	7.881	7.57054	7.2837	7.0179	6.7709	6.54077	6.32585	6.12467	6.11963	6.11712	6.11461	6.11211	6.10961	6.10711	6.10461	6.10211	6.09962	6.09714
							3	654.172	139.192	78.0236	54.21	41.5373	33.6694	28.3091	24.4225	21.4753	19.1635	17.3018	15.7703	14.4883	13.3995	12.4632	11.6495	10.9358	10.3047	9.74269	9.23899	8.78498	8.37365	7.99926	7.65703	7.343	7.05382	6.84685	6.84333	6.8398	6.83628	6.83277	6.82926	6.82575	6.82225	6.81876	6.81527	6.81178	6.8083	6.80483	6.80136	6.79789	6.79443
							3.5	619.776	131.874	73.9227	51.3613	39.3549	31.9007	26.8224	23.1401	20.3478	18.1577	16.3938	14.9428	13.7283	12.6967	11.8096	11.0387	10.3625	9.76465	9.23219	8.75498	8.32484	7.93514	7.58043	7.57046	7.56575	7.56104	7.55635	7.55166	7.54697	7.5423	7.53763	7.53297	7.52832	7.52368	7.51904	7.51441	7.50979	7.50517	7.50057	7.49597	7.49138	7.48679
							4	593.977	126.386	70.8468	49.2246	37.7181	30.5742	25.7072	22.1783	19.5022	17.4032	15.7128	14.3222	13.1582	12.1696	11.3194	10.5806	9.93258	9.35958	8.84929	8.39195	8.29955	8.29347	8.28741	8.28135	8.27531	8.26928	8.26326	8.25725	8.25125	8.24526	8.23929	8.23332	8.22737	8.22143	8.21549	8.20957	8.20366	8.19777	8.19188	8.186	8.18013	8.17428
							4.5	573.909	122.117	68.4543	47.5627	36.4449	29.5423	24.8398	21.4301	18.8445	16.8164	15.1831	13.8395	12.7148	11.7595	10.9381	10.2243	9.59816	9.04452	9.02806	9.02045	9.01285	9.00527	8.99771	8.99016	8.98263	8.97511	8.96761	8.96012	8.95265	8.9452	8.93776	8.93034	8.92293	8.91554	8.90816	8.9008	8.89345	8.88612	8.87881	8.87151	8.86422	8.85695
							5	557.854	118.702	66.5402	46.233	35.4262	28.7168	24.1459	20.8315	18.3182	16.3469	14.7593	13.4533	12.36	11.4315	10.6331	9.93922	9.76177	9.75244	9.74313	9.73384	9.72457	9.71532	9.7061	9.6969	9.68772	9.67856	9.66942	9.6603	9.65121	9.64213	9.63308	9.62405	9.61504	9.60604	9.59707	9.58813	9.5792	9.57029	9.5614	9.55253	9.54369	9.53486
							5.5	544.718	115.907	64.974	45.145	34.5928	28.0414	23.578	20.3418	17.8876	15.9627	14.4125	13.1372	12.0698	11.1631	10.5017	10.4905	10.4793	10.4681	10.4569	10.4458	10.4347	10.4236	10.4126	10.4016	10.3906	10.3796	10.3687	10.3578	10.3469	10.3361	10.3253	10.3145	10.3037	10.293	10.2823	10.2716	10.2609	10.2503	10.2397	10.2291	10.2186	10.2081
							6	533.77	113.578	63.6688	44.2383	33.8982	27.4784	23.1048	19.9336	17.5288	15.6426	14.1235	12.8739	11.8279	11.2357	11.2224	11.2091	11.1958	11.1826	11.1695	11.1564	11.1433	11.1302	11.1172	11.1042	11.0913	11.0784	11.0655	11.0526	11.0398	11.0271	11.0143	11.0016	10.989	10.9764	10.9638	10.9512	10.9387	10.9262	10.9137	10.9013	10.8889	10.8766
							6.5	524.506	111.607	62.5643	43.4711	33.3104	27.0021	22.7044	19.5882	17.2252	15.3717	13.879	12.651	11.9735	11.9579	11.9424	11.9269	11.9115	11.8961	11.8808	11.8655	11.8503	11.8351	11.8199	11.8048	11.7897	11.7747	11.7598	11.7448	11.73	11.7151	11.7003	11.6856	11.6709	11.6562	11.6416	11.627	11.6125	11.598	11.5836	11.5692	11.5548	11.5405
							7	516.565	109.918	61.6175	42.8135	32.8066	26.5938	22.3612	19.2922	16.9649	15.1395	13.6694	12.7158	12.6977	12.6798	12.6619	12.644	12.6262	12.6085	12.5908	12.5732	12.5557	12.5382	12.5207	12.5034	12.486	12.4688	12.4516	12.4344	12.4173	12.4002	12.3833	12.3663	12.3494	12.3326	12.3158	12.2991	12.2824	12.2658	12.2493	12.2327	12.2163	12.1999
							7.5	509.683	108.454	60.797	42.2435	32.3699	26.2399	22.0637	19.0356	16.7393	14.9382	13.4877	13.4423	13.4217	13.4012	13.3807	13.3604	13.3401	13.3198	13.2997	13.2796	13.2596	13.2396	13.2197	13.1999	13.1802	13.1605	13.1409	13.1213	13.1019	13.0825	13.0631	13.0439	13.0247	13.0055	12.9864	12.9674	12.9485	12.9296	12.9108	12.892	12.8733	12.8547
							8	503.66	107.173	60.079	41.7447	31.9878	25.9303	21.8034	18.811	16.5419	14.7621	14.1922	14.1688	14.1454	14.1222	14.099	14.076	14.053	14.0301	14.0073	13.9845	13.9619	13.9393	13.9168	13.8945	13.8721	13.8499	13.8278	13.8057	13.7837	13.7618	13.74	13.7183	13.6966	13.675	13.6535	13.6321	13.6107	13.5894	13.5682	13.5471	13.5261	13.5051
							8.5	498.346	106.042	59.4454	41.3046	31.6507	25.657	21.5737	18.6129	16.3677	14.948	14.9215	14.8952	14.8689	14.8428	14.8167	14.7908	14.765	14.7392	14.7136	14.6881	14.6627	14.6373	14.6121	14.587	14.562	14.537	14.5122	14.4875	14.4628	14.4383	14.4139	14.3895	14.3652	14.3411	14.317	14.293	14.2691	14.2453	14.2216	14.198	14.1745	14.1511
							9	493.622	105.037	58.8822	40.9133	31.351	25.4141	21.3695	18.4368	16.2129	15.6805	15.6509	15.6215	15.5921	15.5629	15.5339	15.5049	15.4761	15.4473	15.4187	15.3903	15.3619	15.3337	15.3056	15.2775	15.2497	15.2219	15.1942	15.1667	15.1393	15.1119	15.0847	15.0576	15.0306	15.0038	14.977	14.9503	14.9238	14.8974	14.871	14.8448	14.8187	14.7926
							9.5	489.396	104.138	58.3783	40.5633	31.0828	25.1968	21.1868	18.2792	16.4464	16.4133	16.3805	16.3477	16.3151	16.2827	16.2504	16.2183	16.1862	16.1544	16.1227	16.0911	16.0596	16.0283	15.9972	15.9661	15.9352	15.9045	15.8738	15.8433	15.813	15.7827	15.7526	15.7227	15.6928	15.6631	15.6335	15.6041	15.5747	15.5455	15.5164	15.4875	15.4586	15.4299
							10	485.591	103.329	57.9247	40.2482	30.8414	25.0012	21.0224	18.1374	17.1829	17.1464	17.1101	17.0739	17.0379	17.002	16.9664	16.9309	16.8955	16.8604	16.8253	16.7905	16.7558	16.7213	16.6869	16.6527	16.6187	16.5848	16.551	16.5175	16.484	16.4507	16.4176	16.3846	16.3518	16.3191	16.2866	16.2542	16.2219	16.1898	16.1579	16.1261	16.0944	16.0629
							10.5	482.149	102.597	57.5143	39.9632	30.623	24.8242	20.8736	18.0091	17.92	17.8798	17.8398	17.8	17.7604	17.721	17.6818	17.6427	17.6039	17.5653	17.5268	17.4886	17.4505	17.4126	17.3749	17.3374	17.3	17.2628	17.2259	17.189	17.1524	17.116	17.0797	17.0435	17.0076	16.9718	16.9362	16.9008	16.8655	16.8304	16.7954	16.7607	16.726	16.6916
							11	479.02	101.931	57.1413	39.704	30.4245	24.6633	20.7383	18.7017	18.6575	18.6134	18.5696	18.526	18.4826	18.4395	18.3966	18.3539	18.3114	18.2691	18.2271	18.1853	18.1436	18.1022	18.061	18.02	17.9793	17.9387	17.8983	17.8581	17.8182	17.7784	17.7388	17.6994	17.6602	17.6213	17.5825	17.5438	17.5054	17.4672	17.4291	17.3913	17.3536	17.3161
							11.5	476.163	101.323	56.8006	39.4674	30.2432	24.5164	20.6148	19.4437	19.3954	19.3473	19.2995	19.2519	19.2046	19.1576	19.1108	19.0643	19.018	18.9719	18.9261	18.8806	18.8353	18.7902	18.7454	18.7008	18.6564	18.6123	18.5684	18.5247	18.4813	18.4381	18.3951	18.3523	18.3098	18.2674	18.2253	18.1834	18.1417	18.1003	18.059	18.0179	17.9771	17.9365
							12	473.543	100.766	56.4883	39.2504	30.077	24.3817	20.5016	20.1864	20.1338	20.0815	20.0295	19.9778	19.9264	19.8753	19.8245	19.7739	19.7237	19.6737	19.624	19.5746	19.5254	19.4765	19.4279	19.3796	19.3315	19.2837	19.2361	19.1888	19.1418	19.095	19.0485	19.0022	18.9562	18.9104	18.8648	18.8195	18.7745	18.7296	18.6851	18.6407	18.5966	18.5527
							12.5	471.134	100.253	56.201	39.0509	29.9242	24.2578	20.987	20.9296	20.8726	20.8159	20.7596	20.7036	20.6479	20.5926	20.5375	20.4828	20.4285	20.3744	20.3206	20.2672	20.214	20.1612	20.1087	20.0565	20.0045	19.9529	19.9015	19.8505	19.7997	19.7492	19.699	19.6491	19.5995	19.5501	19.501	19.4522	19.4037	19.3554	19.3074	19.2596	19.2121	19.1649
							13	468.909	99.7801	55.9358	38.8666	29.783	24.1434	21.7356	21.6735	21.6119	21.5507	21.4898	21.4293	21.3692	21.3094	21.2501	21.191	21.1324	21.074	21.0161	20.9585	20.9012	20.8443	20.7877	20.7314	20.6755	20.6199	20.5646	20.5097	20.4551	20.4008	20.3468	20.2931	20.2397	20.1867	20.1339	20.0815	20.0293	19.9775	19.9259	19.8747	19.8237	19.773
							13.5	466.849	99.3419	55.6902	38.696	29.6523	24.0375	22.4849	22.4181	22.3517	22.2857	22.2201	22.155	22.0902	22.0259	21.962	21.8985	21.8354	21.7727	21.7103	21.6484	21.5868	21.5257	21.4649	21.4045	21.3444	21.2847	21.2254	21.1664	21.1078	21.0496	20.9917	20.9342	20.877	20.8201	20.7636	20.7074	20.6515	20.596	20.5408	20.4859	20.4314	20.3771
							14	464.937	98.935	55.4622	38.5376	29.531	23.9392	23.2351	23.1633	23.0919	23.021	22.9505	22.8805	22.811	22.742	22.6734	22.6052	22.5375	22.4702	22.4034	22.337	22.271	22.2055	22.1403	22.0756	22.0113	21.9474	21.8839	21.8208	21.7581	21.6958	21.6338	21.5723	21.5112	21.4504	21.39	21.3299	21.2703	21.211	21.152	21.0934	21.0352	20.9773
							14.5	463.156	98.5561	55.2499	38.3902	29.418	24.0638	23.9862	23.9091	23.8325	23.7565	23.681	23.606	23.5316	23.4576	23.3842	23.3112	23.2387	23.1668	23.0953	23.0242	22.9537	22.8836	22.814	22.7448	22.6761	22.6079	22.5401	22.4727	22.4058	22.3393	22.2732	22.2076	22.1423	22.0775	22.0131	21.9492	21.8856	21.8224	21.7596	21.6972	21.6352	21.5736
							15	461.494	98.2025	55.0517	38.2525	29.3126	24.8211	24.738	24.6555	24.5737	24.4923	24.4116	24.3315	24.2519	24.1729	24.0944	24.0165	23.9391	23.8623	23.7859	23.7102	23.6349	23.5602	23.4859	23.4122	23.339	23.2662	23.194	23.1222	23.051	22.9802	22.9098	22.84	22.7706	22.7016	22.6331	22.5651	22.4975	22.4303	22.3636	22.2973	22.2314	22.166
							15.5	459.939	97.8717	54.8663	38.1237	29.2139	25.5794	25.4907	25.4026	25.3152	25.2285	25.1423	25.0568	24.972	24.8877	24.804	24.721	24.6386	24.5567	24.4754	24.3948	24.3146	24.2351	24.1561	24.0777	23.9998	23.9225	23.8457	23.7694	23.6936	23.6184	23.5437	23.4695	23.3958	23.3226	23.2499	23.1777	23.106	23.0348	22.964	22.8937	22.8239	22.7545
							16	458.481	97.5616	54.6925	38.003	29.1214	26.3388	26.2442	26.1504	26.0573	25.9648	25.8731	25.7821	25.6918	25.6021	25.5131	25.4248	25.3372	25.2501	25.1638	25.078	24.9929	24.9084	24.8246	24.7413	24.6586	24.5765	24.4951	24.4142	24.3338	24.2541	24.1749	24.0962	24.0181	23.9406	23.8636	23.7871	23.7112	23.6358	23.5609	23.4865	23.4126	23.3393
							16.5	457.111	97.2703	54.5292	37.8896	29.0345	27.0992	26.9986	26.8988	26.7998	26.7015	26.604	26.5073	26.4114	26.3161	26.2217	26.1279	26.0349	25.9425	25.8509	25.76	25.6697	25.5802	25.4913	25.403	25.3155	25.2285	25.1422	25.0566	24.9715	24.8871	24.8033	24.7201	24.6376	24.5556	24.4742	24.3933	24.3131	24.2334	24.1543	24.0757	23.9977	23.9202
							17			54.3755	37.7828	28.9527	27.8606	27.7538	27.6478	27.5427	27.4385	27.335	27.2325	27.1307	27.0298	26.9296	26.8303	26.7317	26.6339	26.5369	26.4406	26.3451	26.2503	26.1563	26.0629	25.9703	25.8784	25.7872	25.6966	25.6068	25.5176	25.4291	25.3413	25.2541	25.1675	25.0816	24.9963	24.9117	24.8276	24.7442	24.6613	24.5791	24.4975
							17.5					28.8756	28.6231	28.5098	28.3975	28.2861	28.1757	28.0661	27.9575	27.8498	27.743	27.637	27.5319	27.4277	27.3243	27.2217	27.1199	27.019	26.9189	26.8195	26.721	26.6232	26.5262	26.4299	26.3344	26.2396	26.1456	26.0522	25.9596	25.8677	25.7765	25.686	25.5962	25.507	25.4185	25.3306	25.2435	25.1569	25.071
							18							29.2666	29.1478	29.03	28.9132	28.7974	28.6825	28.5687	28.4558	28.3438	28.2328	28.1228	28.0136	27.9053	27.798	27.6915	27.5859	27.4811	27.3772	27.2741	27.1719	27.0704	26.9698	26.87	26.771	26.6727	26.5752	26.4785	26.3825	26.2873	26.1928	26.0991	26.006	25.9137	25.8221	25.7311	25.6409
							18.5								29.8988	29.7743	29.6509	29.5287	29.4075	29.2873	29.1682	29.0501	28.933	28.817	28.7019	28.5878	28.4747	28.3625	28.2513	28.1409	28.0316	27.9231	27.8155	27.7088	27.6029	27.498	27.3938	27.2905	27.1881	27.0865	26.9856	26.8856	26.7864	26.688	26.5903	26.4934	26.3972	26.3018	26.2072
							19										30.389	30.2601	30.1323	30.0057	29.8802	29.7558	29.6325	29.5103	29.3892	29.2691	29.1501	29.0321	28.9151	28.7991	28.6841	28.5701	28.457	28.3449	28.2337	28.1235	28.0142	27.9058	27.7982	27.6916	27.5858	27.4809	27.3769	27.2737	27.1713	27.0697	26.969	26.869	26.7698
							19.5											30.9916	30.8571	30.7238	30.5918	30.461	30.3313	30.2028	30.0755	29.9493	29.8242	29.7002	29.5774	29.4556	29.3348	29.2152	29.0965	28.9789	28.8623	28.7467	28.632	28.5184	28.4057	28.294	28.1831	28.0732	27.9643	27.8562	27.749	27.6427	27.5373	27.4327	27.329
							20												31.5818	31.4417	31.303	31.1655	31.0293	30.8944	30.7607	30.6283	30.497	30.367	30.2381	30.1104	29.9838	29.8583	29.734	29.6107	29.4886	29.3675	29.2474	29.1284	29.0105	28.8935	28.7776	28.6626	28.5486	28.4356	28.3235	28.2124	28.1022	27.9929	27.8846
							20.5														32.0138	31.8695	31.7267	31.5852	31.445	31.3061	31.1686	31.0323	30.8972	30.7635	30.6309	30.4995	30.3694	30.2404	30.1126	29.9859	29.8604	29.7359	29.6126	29.4903	29.3692	29.249	29.13	29.0119	28.8949	28.7789	28.6638	28.5498	28.4367
							21															32.573	32.4233	32.2751	32.1282	31.9828	31.8388	31.6962	31.5549	31.4149	31.2762	31.1389	31.0028	30.8679	30.7344	30.602	30.4708	30.3409	30.2121	30.0844	29.9579	29.8326	29.7083	29.5851	29.4631	29.3421	29.2221	29.1032	28.9853
							21.5																33.1192	32.9641	32.8105	32.6584	32.5078	32.3586	32.2109	32.0647	31.9198	31.7763	31.6342	31.4934	31.3539	31.2157	31.0789	30.9433	30.8089	30.6758	30.5439	30.4132	30.2837	30.1553	30.0281	29.902	29.7771	29.6533	29.5305
							22																	33.6522	33.4917	33.3328	33.1755	33.0197	32.8655	32.7128	32.5615	32.4118	32.2635	32.1167	31.9712	31.8272	31.6845	31.5431	31.4031	31.2644	31.127	30.9909	30.8561	30.7224	30.59	30.4589	30.3289	30.2	30.0724
							22.5																		34.1719	34.0061	33.8419	33.6794	33.5185	33.3592	33.2015	33.0454	32.8909	32.7379	32.5863	32.4363	32.2877	32.1405	31.9948	31.8504	31.7074	31.5658	31.4255	31.2866	31.1489	31.0125	30.8774	30.7435	30.6109
							23																			34.6782	34.507	34.3376	34.17	34.004	33.8398	33.6772	33.5163	33.357	33.1992	33.0431	32.8885	32.7354	32.5838	32.4337	32.2851	32.1379	31.9921	31.8477	31.7047	31.563	31.4227	31.2837	31.146
							23.5																				35.1709	34.9945	34.8199	34.6472	34.4763	34.3071	34.1397	33.974	33.81	33.6476	33.4869	33.3278	33.1703	33.0144	32.86	32.7072	32.5558	32.4059	32.2575	32.1105	31.9649	31.8207	31.6778
							24																					35.65	35.4684	35.2887	35.111	34.9351	34.7611	34.5889	34.4185	34.2499	34.083	33.9178	33.7543	33.5925	33.4322	33.2736	33.1166	32.9611	32.8072	32.6548	32.5039	32.3544	32.2064
							24.5																						36.1153	35.9286	35.744	35.5613	35.3806	35.2018	35.0249	34.8499	34.6767	34.5053	34.3357	34.1679	34.0018	33.8373	33.6746	33.5135	33.354	33.1961	33.0398	32.885	32.7318
							25																							36.5669	36.3752	36.1857	35.9981	35.8127	35.6292	35.4477	35.2681	35.0905	34.9147	34.7407	34.5686	34.3983	34.2297	34.0629	33.8978	33.7344	33.5726	33.4124	33.2539
							25.5																								37.0048	36.8082	36.6137	36.4215	36.2313	36.0432	35.8572	35.6732	35.4911	35.311	35.1328	34.9565	34.7821	34.6095	34.4387	34.2696	34.1023	33.9368	33.7729
							26																								37.6326	37.4288	37.2274	37.0282	36.8313	36.6365	36.4439	36.2535	36.0651	35.8787	35.6944	35.5121	35.3317	35.1532	34.9766	34.8019	34.6291	34.458	34.2887
							26.5																									38.0477	37.8391	37.633	37.4292	37.2276	37.0284	36.8314	36.6366	36.4439	36.2534	36.0649	35.8785	35.6941	35.5117	35.3313	35.1528	34.9761	34.8014
							27																										38.449	38.2357	38.0249	37.8166	37.6106	37.407	37.2056	37.0066	36.8097	36.6151	36.4226	36.2322	36.0439	35.8577	35.6735	35.4912	35.311
							27.5																										39.0569	38.8364	38.6186	38.4033	38.1905	37.9802	37.7723	37.5667	37.3635	37.1626	36.964	36.7675	36.5733	36.3812	36.1912	36.0033	35.8175
							28																											39.4352	39.2102	38.9879	38.7682	38.551	38.3365	38.1244	37.9147	37.7075	37.5026	37.3001	37.0999	36.9019	36.7061	36.5125	36.321
							28.5																												39.7997	39.5703	39.3436	39.1196	38.8983	38.6796	38.4634	38.2498	38.0387	37.8299	37.6236	37.4197	37.218	37.0186	36.8215
							29																												40.3872	40.1505	39.9168	39.6858	39.4577	39.2323	39.0096	38.7895	38.572	38.3571	38.1446	37.9346	37.727	37.5218	37.319
							29.5																													40.7286	40.4877	40.2498	40.0148	39.7826	39.5532	39.3266	39.1027	38.8815	38.6628	38.4468	38.2332	38.0221	37.8135
							30																														41.0565	40.8115	40.5695	40.3305	40.0944	39.8612	39.6308	39.4032	39.1783	38.9561	38.7366	38.5196	38.3051
							Config 3
							Row Labels	0.00144	0.006769	0.012078	0.017387	0.022696	0.028005	0.033314	0.038623	0.043932	0.049241	0.05455	0.059859	0.065168	0.070477	0.075786	0.081095	0.086404	0.091713	0.097022	0.102331	0.10764	0.112949	0.118258	0.123567	0.128876	0.134185	0.139494	0.144803	0.150112	0.155421	0.16073	0.166039	0.171348	0.176657	0.181966	0.187275	0.192584	0.197893	0.203202	0.208511	0.21382	0.219129
							1	99999	99999	99999	99999	99999	99999	99999	99999	99999	99999	99999	99999	99999	99999	99999	99999	99999	99999	99999	99999	99999	99999	99999	99999	99999	99999	99999	99999	99999	99999	99999	99999	99999	99999	99999	99999	99999	99999	99999	99999	99999	99999
							1.5	99999	99999	99999	99999	99999	99999	99999	99999	99999	99999	99999	99999	99999	99999	99999	99999	99999	99999	99999	99999	99999	99999	99999	99999	99999	99999	99999	99999	99999	99999	99999	99999	99999	99999	99999	99999	99999	99999	99999	99999	99999	99999
							2	99999	99999	99999	99999	99999	99999	99999	99999	99999	99999	99999	99999	99999	99999	99999	99999	99999	99999	99999	99999	99999	99999	99999	99999	99999	99999	99999	99999	99999	99999	99999	99999	99999	99999	99999	99999	99999	99999	99999	1709.24	175.163	92.3186
							2.5	99999	99999	99999	99999	99999	99999	99999	99999	99999	99999	99999	99999	99999	99999	99999	99999	99999	99999	99999	99999	99999	99999	99999	99999	99999	99999	99999	99999	99999	99999	99999	99999	180.95	89.8859	59.7978	44.8032	35.8223	29.8415	25.5728	22.373	19.8853	17.8958
							3	99999	99999	99999	99999	99999	99999	99999	99999	99999	99999	99999	99999	99999	99999	99999	99999	99999	99999	99999	99999	99999	99999	99999	99999	99999	99999	711.512	135.569	74.9286	51.7744	39.5539	32.0019	26.8722	23.1605	20.3502	18.1484	16.3769	14.9208	13.7026	12.6686	11.7798	11.0077
							3.5	99999	99999	99999	99999	99999	99999	99999	99999	99999	99999	99999	99999	99999	99999	99999	99999	99999	99999	99999	99999	99999	99999	99999	162.057	80.3945	53.4606	40.0469	32.0156	26.6684	22.8524	19.9923	17.7689	15.9909	14.5366	13.325	12.3001	11.4217	10.6605	9.99464	9.40716	8.885	8.41786
							4	99999	99999	99999	99999	99999	99999	99999	99999	99999	99999	99999	99999	99999	99999	99999	99999	99999	99999	99999	99999	192.863	85.4847	54.9162	40.4536	32.0222	26.5001	22.6032	19.706	17.4676	15.6861	14.2347	13.0294	12.0125	11.143	10.391	9.73423	9.15567	8.64213	8.18324	7.77071	7.39785	7.0592
							4.5	99999	99999	99999	99999	99999	99999	99999	99999	99999	99999	99999	99999	99999	99999	99999	99999	99999	99999	151.437	75.0705	49.9085	37.3818	29.8831	24.8911	21.3289	18.6592	16.5838	14.9243	13.567	12.4362	11.4796	10.6598	9.94948	9.32803	8.77976	8.29248	7.85653	7.46421	7.10929	6.78665	6.4921	6.22211
							5	99999	99999	99999	99999	99999	99999	99999	99999	99999	99999	99999	99999	99999	99999	99999	99999	198.107	83.7565	53.1086	38.8838	30.6707	25.3232	21.5643	18.7776	16.6292	14.9223	13.5335	12.3814	11.4103	10.5807	9.86364	9.23776	8.68669	8.19777	7.76105	7.3686	7.01401	6.69205	6.39841	6.12952	5.88238	5.65444
							5.5	99999	99999	99999	99999	99999	99999	99999	99999	99999	99999	99999	99999	99999	99999	867.301	122.024	65.6364	44.8952	34.1168	27.5131	23.0522	19.8367	17.4089	15.511	13.9866	12.7353	11.6897	10.803	10.0415	9.38042	8.80115	8.28938	7.83395	7.42606	7.05862	6.72591	6.42322	6.14667	5.893	5.6595	5.44385	5.24407
							6	99999	99999	99999	99999	99999	99999	99999	99999	99999	99999	99999	99999	99999	391.009	102.782	59.1741	41.5498	32.0164	26.0426	21.9484	18.9672	16.6995	14.9166	13.478	12.2927	11.2993	10.4546	9.72759	9.09527	8.54027	8.04922	7.61167	7.21933	6.86554	6.54488	6.2529	5.98593	5.74088	5.51515	5.30656	5.11321	4.93351
							6.5	99999	99999	99999	99999	99999	99999	99999	99999	99999	99999	99999	99999	375.075	100.481	58.0175	40.7857	31.4477	25.5903	21.5731	18.6467	16.4199	14.6686	13.2552	12.0905	11.1142	10.284	9.56931	8.94768	8.40202	7.9192	7.48896	7.10316	6.75524	6.43988	6.15273	5.89015	5.64913	5.42711	5.22194	5.03175	4.85498	4.69025
							7	99999	99999	99999	99999	99999	99999	99999	99999	99999	99999	99999	585.921	109.963	60.682	41.9063	32.0059	25.8907	21.7384	18.7346	16.4606	14.6793	13.2463	12.0684	11.0831	10.2468	9.52799	8.90358	8.35611	7.87219	7.44135	7.05532	6.70745	6.39235	6.1056	5.84353	5.6031	5.38172	5.17722	4.98775	4.81169	4.64768	4.49452
							7.5	99999	99999	99999	99999	99999	99999	99999	99999	99999	99999	99999	136.348	67.5217	44.8753	33.6067	26.863	22.3744	19.1718	16.7718	14.9063	13.4145	12.1945	11.1782	10.3184	9.58161	8.9432	8.38469	7.89195	7.45403	7.06225	6.70968	6.39072	6.10078	5.83608	5.59345	5.37025	5.16423	4.97348	4.79636	4.63147	4.47758	4.33362
							8	99999	99999	99999	99999	99999	99999	99999	99999	99999	99999	207.73	80.8316	50.1837	36.3899	28.5457	23.4848	19.9489	17.3391	15.3336	13.7443	12.4538	11.3851	10.4856	9.71799	9.05527	8.47731	7.96883	7.51801	7.11557	6.75412	6.4277	6.13145	5.86137	5.61415	5.38699	5.17756	4.98385	4.80416	4.63702	4.48116	4.33547	4.19899
							8.5	99999	99999	99999	99999	99999	99999	99999	99999	99999	607.363	107.784	59.1471	40.7595	31.0953	25.1369	21.0957	18.1746	15.9646	14.2343	12.8427	11.6992	10.7429	9.93141	9.23405	8.62836	8.09736	7.62806	7.21028	6.83598	6.49872	6.19324	5.91527	5.66125	5.4282	5.21364	5.01545	4.83182	4.66121	4.50227	4.35386	4.21495	4.08467
							9	99999	99999	99999	99999	99999	99999	99999	99999	99999	177.877	75.0846	47.5904	34.8374	27.4764	22.6846	19.3168	16.8203	14.8957	13.3667	12.1227	11.0907	10.221	9.47786	8.83566	8.27511	7.78157	7.3437	6.95258	6.60111	6.28355	5.99522	5.73226	5.49146	5.27013	5.06601	4.87716	4.70193	4.53889	4.38683	4.24466	4.11145	3.98638
							9.5	99999	99999	99999	99999	99999	99999	99999	99999	675.942	108.255	58.8469	40.4091	30.7708	24.8462	20.8357	17.9406	15.7524	14.0405	12.6645	11.5344	10.5897	9.78828	9.09979	8.50194	7.97795	7.51492	7.1028	6.73362	6.40102	6.0998	5.82574	5.57531	5.34558	5.1341	4.93876	4.75779	4.58966	4.43305	4.28681	4.14995	4.02159	3.90097
							10	99999	99999	99999	99999	99999	99999	99999	99999	211.519	79.7443	49.1395	35.5137	27.8057	22.8481	19.3917	16.8443	14.8889	13.3407	12.0844	11.0447	10.1699	9.42377	8.77978	8.21832	7.72449	7.28676	6.89608	6.54526	6.22849	5.94104	5.67903	5.43921	5.21889	5.01578	4.82793	4.6537	4.49165	4.34054	4.19931	4.06701	3.94283	3.82604
							10.5	99999	99999	99999	99999	99999	99999	99999	99999	129.76	64.2307	42.6823	31.9625	25.5479	21.2787	18.2328	15.9502	14.1761	12.7574	11.5972	10.6307	9.81311	9.11248	8.50539	7.97428	7.50573	7.0893	6.71675	6.38149	6.07819	5.80249	5.55078	5.32007	5.10783	4.91192	4.73054	4.56212	4.40533	4.259	4.12211	3.99378	3.87324	3.75979
							11	99999	99999	99999	99999	99999	99999	99999	394.074	95.7095	54.4761	38.0768	29.2685	23.7711	20.0132	17.282	15.2072	13.5776	12.2639	11.1822	10.2761	9.50604	8.84353	8.26751	7.76207	7.315	6.91673	6.55969	6.23778	5.94608	5.68051	5.43772	5.21489	5.00966	4.82003	4.64427	4.48093	4.32873	4.18657	4.05349	3.92864	3.81129	3.70077
							11.5	99999	99999	99999	99999	99999	99999	99999	198.931	77.0404	47.7756	34.6263	27.1547	22.3364	18.9712	16.4878	14.5799	13.0681	11.8407	10.8244	9.96892	9.23899	8.60883	8.05929	7.57583	7.14722	6.76461	6.42098	6.11066	5.82903	5.57229	5.33728	5.12134	4.92226	4.73813	4.56732	4.40845	4.26029	4.12182	3.99209	3.87032	3.75579	3.64787
							12	99999	99999	99999	99999	99999	99999	99999	136.376	65.2504	42.8888	31.9446	25.4518	21.1536	18.0982	15.8146	14.0432	12.629	11.4739	10.5127	9.70026	9.00459	8.4022	7.8755	7.41107	6.99848	6.62951	6.29759	5.9974	5.72461	5.47562	5.24746	5.03761	4.84395	4.66468	4.49825	4.34334	4.19878	4.06357	3.93683	3.81779	3.70578	3.60017
							12.5	99999	99999	99999	99999	99999	99999	693.24	105.545	57.1285	39.167	29.8004	24.0506	20.1617	17.3561	15.2365	13.5787	12.2467	11.1529	10.2387	9.46328	8.79721	8.2189	7.71208	7.26426	6.8657	6.50871	6.18709	5.89585	5.63087	5.38875	5.16666	4.9622	4.77337	4.59843	4.43591	4.28452	4.14317	4.01089	3.88682	3.77024	3.66047	3.55695
							13	99999	99999	99999	99999	99999	99999	293.843	87.1861	51.1933	36.2379	28.0469	22.8774	19.3179	16.7176	14.7348	13.1729	11.9107	10.8696	9.99604	9.25268	8.61241	8.05518	7.56581	7.13261	6.74645	6.40005	6.08758	5.80428	5.54624	5.31025	5.09357	4.89395	4.70943	4.53837	4.37935	4.23114	4.09267	3.96301	3.84136	3.72698	3.61925	3.5176
							13.5	99999	99999	99999	99999	99999	99999	191.065	75.0045	46.6663	33.8725	26.5861	21.8807	18.5913	16.1623	14.2952	12.8152	11.6132	10.6177	9.77956	9.06429	8.4467	7.90805	7.43411	7.01389	6.63875	6.30179	5.99747	5.72127	5.46947	5.23896	5.02715	4.83187	4.65124	4.48367	4.32781	4.18246	4.0466	3.91932	3.79984	3.68746	3.58157	3.48161
							14	99999	99999	99999	99999	99999	99999	143.947	66.3313	43.0994	31.9224	25.3503	21.0234	17.9591	15.675	13.9068	12.4975	11.3479	10.3922	9.58525	8.89476	8.29725	7.7751	7.31492	6.90628	6.54099	6.2125	5.91551	5.64569	5.39949	5.17393	4.96652	4.77516	4.59804	4.43364	4.28064	4.13789	4.00439	3.87927	3.76177	3.65121	3.54699	3.44859
							14.5	99999	99999	99999	99999	99999	2538.39	116.909	59.8413	40.2164	30.2869	24.2913	20.2782	17.4039	15.2438	13.5612	12.2135	11.1098	10.1893	9.40986	8.74139	8.16177	7.65438	7.20652	6.80828	6.45186	6.13099	5.84062	5.57658	5.33545	5.11437	4.91095	4.72315	4.54923	4.38771	4.23731	4.09693	3.96558	3.84243	3.72674	3.61784	3.51515	3.41816
							15	99999	99999	99999	99999	99999	532.727	99.3684	54.8024	37.8378	28.8957	23.3736	19.6245	16.9125	14.8597	13.2517	11.9581	10.8949	10.0056	9.25074	8.60197	8.0384	7.54428	7.10751	6.71867	6.37026	6.0563	5.77192	5.51313	5.27661	5.05962	4.85983	4.67527	4.50427	4.34539	4.19737	4.05915	3.92978	3.80843	3.69439	3.58701	3.48573	3.39004
							15.5	99999	99999	99999	99999	99999	305.48	87.0691	50.7766	35.8417	27.6976	22.5707	19.0462	16.4745	14.5153	12.9729	11.7272	10.7001	9.83861	9.10574	8.47468	7.92557	7.44344	7.01672	6.63639	6.29528	5.9876	5.70869	5.45467	5.22237	5.00911	4.81265	4.63106	4.46273	4.30626	4.16043	4.0242	3.89664	3.77695	3.66444	3.55846	3.45847	3.36398
							16	99999	99999	99999	99999	99999	217.837	77.9669	47.4864	34.1428	26.6552	21.8623	18.5312	16.0817	14.2046	12.7204	11.5174	10.5225	9.68608	8.97305	8.35799	7.82199	7.35074	6.93317	6.5606	6.22613	5.9242	5.65028	5.40065	5.17221	4.96237	4.76896	4.59011	4.42424	4.26998	4.12617	3.99176	3.86588	3.74772	3.63661	3.53193	3.43313	3.33974
							16.5	99999	99999	99999	99999	99999	171.383	70.9586	44.7469	32.6793	25.7398	21.2326	18.0695	15.7273	13.9231	12.4907	11.3259	10.36	9.54622	8.85116	8.25063	7.72656	7.26523	6.85601	6.49054	6.16216	5.8655	5.59617	5.35056	5.12568	4.91899	4.72839	4.55206	4.38846	4.23626	4.0943	3.96159	3.83725	3.72051	3.6107	3.50721	3.40953	3.31716
							17			99999	99999	99999	142.607	65.3959	42.4305	31.4053	24.9297	20.6692	17.6532	15.406	13.6667	12.2808	11.1504	10.2108	9.41752	8.73881	8.15152	7.63835	7.18611	6.78454	6.42559	6.10281	5.81099	5.54589	5.304	5.08239	4.87862	4.69062	4.51662	4.35512	4.20481	4.06458	3.93344	3.81053	3.69511	3.5865	3.48413	3.38747	3.29606
							17.5					99999	123.03	60.8735	40.4462	30.2864	24.2076	20.1621	17.276	15.1133	13.4323	12.0882	10.989	10.0733	9.29869	8.6349	8.05975	7.55658	7.11268	6.71816	6.36521	6.04759	5.76025	5.49906	5.2606	5.04203	4.84096	4.65536	4.48353	4.32397	4.17543	4.0368	3.90712	3.78555	3.67134	3.56387	3.46253	3.36683	3.2763
							18							57.1243	38.7273	29.2957	23.5598	19.7033	16.9326	14.8456	13.2171	11.911	10.8401	9.94613	9.18862	8.53853	7.97452	7.48055	7.04434	6.65632	6.30893	5.99609	5.71289	5.45532	5.22005	5.0043	4.80573	4.62238	4.45256	4.29482	4.14792	4.01078	3.88245	3.76213	3.64907	3.54264	3.44227	3.34746	3.25776
							18.5								37.2239	28.4124	22.9755	19.2862	16.6186	14.5998	13.0189	11.7472	10.7022	9.82821	9.08639	8.4489	7.89516	7.40969	6.98059	6.59859	6.25634	5.94793	5.66859	5.41439	5.18208	4.96895	4.77272	4.59145	4.42351	4.26746	4.12209	3.98635	3.85929	3.74013	3.62813	3.52268	3.42322	3.32925	3.24033
							19										22.4458	18.9054	16.3304	14.3734	12.8357	11.5955	10.5742	9.71854	8.99119	8.36532	7.82108	7.34348	6.92098	6.54457	6.2071	5.90281	5.62706	5.37599	5.14644	4.93576	4.74171	4.5624	4.39621	4.24174	4.09781	3.96337	3.8375	3.71943	3.60843	3.5039	3.40529	3.3121	3.22391
							19.5											18.5563	16.065	14.164	12.6658	11.4546	10.4551	9.61629	8.9023	8.2872	7.75177	7.28148	6.86511	6.4939	6.16088	5.86045	5.58804	5.3399	5.11294	4.90455	4.71254	4.53505	4.3705	4.21752	4.07493	3.94171	3.81696	3.69991	3.58985	3.48619	3.38837	3.29592	3.20841
							20												15.8197	13.97	12.5079	11.3233	10.3439	9.52073	8.81913	8.21402	7.68679	7.22329	6.81265	6.44629	6.11743	5.82059	5.55131	5.30592	5.08137	4.87513	4.68503	4.50926	4.34625	4.19466	4.05334	3.92127	3.79757	3.68148	3.5723	3.46945	3.37238	3.28063	3.19377
							20.5														12.3608	11.2007	10.2399	9.43123	8.74113	8.14533	7.62573	7.16858	6.76328	6.40146	6.0765	5.78303	5.51668	5.27386	5.05159	4.84736	4.65906	4.4849	4.32334	4.17306	4.03293	3.90194	3.77923	3.66404	3.5557	3.45361	3.35726	3.26616	3.1799
							21															11.0859	10.1424	9.34722	8.66784	8.08072	7.56825	7.11705	6.71674	6.35918	6.03787	5.74756	5.48397	5.24357	5.02343	4.8211	4.63449	4.46185	4.30166	4.15262	4.0136	3.88363	3.76186	3.64752	3.53997	3.4386	3.34291	3.25244	3.16675
							21.5																10.0509	9.26821	8.59884	8.01984	7.51405	7.06841	6.6728	6.31924	6.00136	5.71402	5.45302	5.2149	4.99678	4.79623	4.61122	4.44001	4.28111	4.13323	3.99528	3.86627	3.74538	3.63185	3.52504	3.42436	3.3293	3.23941	3.15427
							22																	9.19376	8.53377	7.96237	7.46285	7.02244	6.63124	6.28144	5.96679	5.68225	5.4237	5.18773	4.97151	4.77265	4.58915	4.41929	4.2616	4.11483	3.97788	3.84979	3.72973	3.61696	3.51085	3.41082	3.31637	3.22703	3.1424
							22.5																		8.47229	7.90803	7.4144	6.97891	6.59187	6.24561	5.93402	5.65212	5.39588	5.16194	4.94751	4.75025	4.56818	4.3996	4.24307	4.09734	3.96133	3.83411	3.71484	3.6028	3.49736	3.39794	3.30405	3.21524	3.13111
							23																			7.85658	7.3685	6.93765	6.55453	6.21161	5.9029	5.62351	5.36945	5.13743	4.9247	4.72895	4.54823	4.38086	4.22543	4.08069	3.94559	3.81918	3.70066	3.58931	3.4845	3.38567	3.29232	3.20401	3.12034
							23.5																				7.32494	6.89847	6.51905	6.1793	5.87331	5.59629	5.3443	5.1141	4.90298	4.70867	4.52923	4.36301	4.20862	4.06482	3.93057	3.80495	3.68714	3.57645	3.47224	3.37397	3.28113	3.1933	3.11007
							24																					6.86122	6.48531	6.14856	5.84515	5.57037	5.32035	5.09188	4.88229	4.68934	4.51111	4.34599	4.19259	4.04969	3.91625	3.79137	3.67424	3.56417	3.46054	3.36279	3.27044	3.18306	3.10026
							24.5																						6.45318	6.11927	5.81831	5.54566	5.2975	5.07067	4.86254	4.67088	4.49382	4.32974	4.17728	4.03523	3.90257	3.77839	3.66191	3.55244	3.44935	3.35211	3.26023	3.17328	3.09087
							25																							6.09133	5.7927	5.52208	5.27569	5.05043	4.84368	4.65325	4.4773	4.31421	4.16264	4.02141	3.88948	3.76598	3.65012	3.54121	3.43864	3.34188	3.25045	3.16391	3.08189
							25.5																								5.76824	5.49954	5.25485	5.03107	4.82564	4.63639	4.46149	4.29935	4.14864	4.00818	3.87696	3.7541	3.63883	3.53046	3.42839	3.33209	3.24108	3.15494	3.07329
							26																								5.74485	5.47799	5.2349	5.01255	4.80838	4.62025	4.44635	4.28512	4.13522	3.9955	3.86496	3.74272	3.62801	3.52016	3.41857	3.32271	3.23211	3.14634	3.06504
							26.5																									5.45736	5.21581	4.9948	4.79184	4.60479	4.43185	4.27148	4.12236	3.98335	3.85345	3.7318	3.61763	3.51027	3.40914	3.3137	3.22349	3.13809	3.05712
							27																										5.1975	4.97779	4.77598	4.58995	4.41793	4.25839	4.11002	3.97169	3.84241	3.72132	3.60766	3.50078	3.40009	3.30505	3.21521	3.13016	3.04952
							27.5																										5.17994	4.96147	4.76076	4.57571	4.40457	4.24582	4.09817	3.96049	3.8318	3.71125	3.59809	3.49166	3.39139	3.29674	3.20726	3.12254	3.0422
							28																											4.94579	4.74613	4.56203	4.39173	4.23374	4.08678	3.94972	3.8216	3.70157	3.58888	3.48289	3.38302	3.28874	3.19961	3.11521	3.03517
							28.5																												4.73208	4.54887	4.37939	4.22213	4.07582	3.93936	3.81178	3.69225	3.58002	3.47445	3.37496	3.28105	3.19224	3.10815	3.0284
							29																												4.71855	4.53622	4.3675	4.21094	4.06527	3.92938	3.80233	3.68328	3.57149	3.46632	3.36721	3.27363	3.18515	3.10135	3.02187
							29.5																													4.52403	4.35606	4.20017	4.05511	3.91978	3.79323	3.67463	3.56327	3.45849	3.35973	3.26648	3.17831	3.09479	3.01558
							30																														4.34503	4.18979	4.04531	3.91051	3.78445	3.6663	3.55534	3.45093	3.35252	3.25959	3.17171	3.08846	3.00951
							Config 2
							Row Labels	0.00144	0.006769	0.012078	0.017387	0.022696	0.028005	0.033314	0.038623	0.043932	0.049241	0.05455	0.059859	0.065168	0.070477	0.075786	0.081095	0.086404	0.091713	0.097022	0.102331	0.10764	0.112949	0.118258	0.123567	0.128876	0.134185	0.139494	0.144803	0.150112	0.155421	0.16073	0.166039	0.171348	0.176657	0.181966	0.187275	0.192584	0.197893	0.203202	0.208511	0.21382	0.219129
							1	1151.02	244.89	137.261	95.3603	73.0621	59.2181	49.7866	42.9479	37.7621	33.6945	30.4186	27.7238	25.4681	23.5523	21.9049	20.4731	19.2173	18.1069	17.118	16.2318	15.4329	14.7092	14.0504	13.4482	12.8957	12.3869	11.9168	11.4811	11.0763	10.6992	10.3469	10.0172	9.70795	9.41725	9.14352	8.88531	8.64134	8.41045	8.19163	7.98395	7.78659	7.59879
							1.5	906.628	192.899	108.124	75.1196	57.556	46.6516	39.2227	33.8361	29.7514	26.5475	23.9672	21.8446	20.0679	18.5588	17.2612	16.1334	15.1443	14.2697	13.4908	12.7927	12.1634	11.5934	11.0745	10.6002	10.165	9.76417	9.3939	9.05077	8.73191	8.43484	8.15739	7.89769	7.65408	7.42511	7.2095	7.00611	6.81394	6.63208	6.45973	6.29615	6.14069	5.99276
							2	784.167	166.847	93.5233	64.9773	49.7862	40.3547	33.9293	29.2703	25.7373	22.9662	20.7345	18.8986	17.3619	16.0566	14.9343	13.9589	13.1034	12.3469	11.6732	11.0694	10.5252	10.0321	9.5833	9.17307	8.79663	8.44998	8.12972	7.83295	7.55716	7.30022	7.06025	6.83562	6.62492	6.42687	6.24039	6.06448	5.89827	5.74097	5.5919	5.45041	5.31594	5.18799
							2.5	710.559	151.188	84.7474	58.8811	45.1159	36.5698	30.7476	26.5259	23.3246	20.8136	18.7914	17.1279	15.7354	14.5527	13.5357	12.6519	11.8766	11.1912	10.5807	10.0336	9.54045	9.09366	8.68699	8.31527	7.97417	7.66006	7.36987	7.10095	6.85105	6.61823	6.40078	6.19724	6.00631	5.82684	5.65785	5.49845	5.34783	5.20529	5.0702	4.94199	4.82015	4.70421
							3	661.412	140.733	78.8878	54.8107	41.9977	34.0427	28.6232	24.6935	21.7137	19.3764	17.494	15.9455	14.6494	13.5485	12.6018	11.7791	11.0575	10.4195	9.85126	9.34199	8.88296	8.46708	8.08854	7.74252	7.42502	7.13264	6.86251	6.61218	6.37956	6.16282	5.96041	5.77094	5.59321	5.42616	5.26886	5.12048	4.98028	4.84761	4.72186	4.60252	4.4891	4.38118
							3.5	626.259	133.254	74.6966	51.8992	39.7673	32.2351	27.1037	23.3829	20.5614	18.3483	16.566	15.0999	13.8726	12.8302	11.9339	11.1549	10.4717	9.86753	9.32951	8.84731	8.41267	8.0189	7.66048	7.33284	7.0322	6.75535	6.49957	6.26254	6.04228	5.83707	5.64542	5.46602	5.29774	5.13957	4.99063	4.85014	4.71739	4.59177	4.47271	4.35971	4.25232	4.15014
							4	599.861	127.639	71.5494	49.713	38.0924	30.8778	25.9626	22.3987	19.6961	17.5764	15.8692	14.4648	13.2893	12.2909	11.4323	10.6862	10.0317	9.45306	8.93771	8.47584	8.05951	7.68232	7.33899	7.02517	6.7372	6.47202	6.22702	5.99999	5.78901	5.59245	5.40888	5.23704	5.07586	4.92436	4.7817	4.64713	4.51998	4.39965	4.28561	4.17737	4.07452	3.97664
							4.5	579.306	123.266	69.0987	48.0106	36.7883	29.8209	25.0741	21.6323	19.0224	16.9753	15.3266	13.9703	12.8351	11.8709	11.0417	10.3212	9.68917	9.13032	8.63261	8.18655	7.78449	7.42022	7.08866	6.78559	6.50749	6.2514	6.0148	5.79555	5.5918	5.40198	5.2247	5.05875	4.90309	4.75678	4.61901	4.48905	4.36626	4.25005	4.13992	4.0354	3.93606	3.84154
							5	562.845	119.764	67.1361	46.6473	35.7438	28.9744	24.3626	21.0186	18.4828	16.4939	14.892	13.5743	12.4714	11.5345	10.729	10.0289	9.41481	8.87182	8.38826	7.95487	7.56423	7.21032	6.88818	6.59373	6.32353	6.07472	5.84484	5.63182	5.43387	5.24944	5.07719	4.91596	4.76473	4.62258	4.48872	4.36246	4.24315	4.13025	4.02325	3.92169	3.82518	3.73335
							5.5	549.363	116.896	65.5287	45.5307	34.8885	28.2812	23.7798	20.516	18.0409	16.0996	14.5361	13.25	12.1734	11.2591	10.4728	9.78946	9.19009	8.66011	8.18813	7.76513	7.38385	7.03842	6.724	6.43659	6.17287	5.93002	5.70565	5.49773	5.30452	5.12451	4.95639	4.79902	4.65141	4.51266	4.38202	4.25878	4.14233	4.03213	3.92769	3.82857	3.73438	3.64474
							6	538.118	114.504	64.188	44.5994	34.175	27.703	23.2938	20.0967	17.6723	15.7707	14.2393	12.9795	11.925	11.0293	10.2591	9.58975	9.00265	8.48352	8.02121	7.60686	7.23339	6.89503	6.58704	6.30553	6.0472	5.80932	5.58955	5.38589	5.19663	5.02031	4.85563	4.70148	4.55689	4.42099	4.29301	4.1723	4.05824	3.95029	3.84799	3.7509	3.65863	3.57083
							6.5	528.595	112.478	63.0526	43.8106	33.5708	27.2133	22.8821	19.7416	17.3602	15.4922	13.9879	12.7504	11.7145	10.8347	10.0781	9.42061	8.84391	8.33397	7.87984	7.47283	7.10597	6.77359	6.47106	6.19453	5.94078	5.7071	5.49122	5.29116	5.10526	4.93206	4.77029	4.61888	4.47684	4.34334	4.21764	4.09906	3.98701	3.88098	3.78049	3.68512	3.59448	3.50824
							7	520.425	110.74	62.0786	43.134	33.0524	26.7932	22.529	19.437	17.0924	15.2533	13.7722	12.5539	11.534	10.6677	9.92286	9.27552	8.70773	8.20567	7.75856	7.35784	6.99665	6.66942	6.37156	6.0993	5.84948	5.61942	5.40687	5.20991	5.02687	4.85635	4.69709	4.54801	4.40817	4.27674	4.15297	4.03623	3.92592	3.82152	3.72259	3.62869	3.53945	3.45454
							7.5	513.339	109.232	61.2337	42.5471	32.6028	26.4288	22.2227	19.1728	16.8601	15.0461	13.5852	12.3834	11.3774	10.5229	9.7882	9.14967	8.58961	8.0944	7.65337	7.25811	6.90184	6.57906	6.28526	6.01671	5.77029	5.54336	5.33371	5.13943	4.95889	4.79068	4.63359	4.48655	4.34861	4.21897	4.09689	3.98173	3.87292	3.76995	3.67236	3.57974	3.49172	3.40797
							8	507.134	107.912	60.4939	42.0332	32.2091	26.1098	21.9545	18.9415	16.6567	14.8646	13.4214	12.2341	11.2402	10.3961	9.67028	9.03947	8.48619	7.99695	7.56126	7.17078	6.81882	6.49994	6.2097	5.94439	5.70094	5.47676	5.26964	5.07771	4.89935	4.73318	4.57799	4.43272	4.29645	4.16838	4.04778	3.93401	3.82652	3.72479	3.62838	3.53688	3.44993	3.36718
							8.5	501.655	106.747	59.8407	41.5795	31.8615	25.8281	21.7176	18.7372	16.4771	14.7044	13.2767	12.1022	11.1191	10.2842	9.56616	8.94217	8.39486	7.91091	7.47993	7.09367	6.74551	6.43008	6.14297	5.88053	5.63971	5.41795	5.21307	5.02321	4.84679	4.68241	4.52889	4.3852	4.2504	4.12371	4.00441	3.89187	3.78554	3.68492	3.58955	3.49904	3.41302	3.33117
							9	496.781	105.71	59.2596	41.1758	31.5523	25.5775	21.507	18.5555	16.3174	14.5619	13.148	11.985	11.0114	10.1846	9.47354	8.85561	8.31362	7.83438	7.40759	7.02508	6.6803	6.36793	6.08361	5.82372	5.58525	5.36564	5.16275	4.97474	4.80003	4.63725	4.48522	4.34292	4.20944	4.08398	3.96583	3.85439	3.74909	3.64945	3.55501	3.46537	3.38019	3.29914
							9.5	492.417	104.782	58.7394	40.8144	31.2754	25.3531	21.3183	18.3928	16.1743	14.4342	13.0328	11.88	10.915	10.0954	9.39061	8.77812	8.24089	7.76586	7.34281	6.96366	6.62191	6.31229	6.03047	5.77286	5.53648	5.31881	5.1177	4.93134	4.75816	4.59681	4.44612	4.30507	4.17276	4.0484	3.9313	3.82083	3.71646	3.61769	3.52408	3.43523	3.3508	3.27046
							10	488.488	103.946	58.2709	40.489	31.0261	25.151	21.1485	18.2463	16.0455	14.3193	12.9291	11.7854	10.8281	10.0151	9.31593	8.70832	8.17538	7.70414	7.28448	6.90835	6.56933	6.26218	5.98261	5.72706	5.49257	5.27663	5.07712	4.89225	4.72045	4.5604	4.41091	4.27098	4.13973	4.01636	3.90019	3.79061	3.68707	3.58909	3.49622	3.40809	3.32433	3.24463
							10.5	484.93	103.189	57.8467	40.1943	30.8004	24.9681	20.9947	18.1137	15.9289	14.2152	12.8351	11.6998	10.7495	9.94238	9.24832	8.64514	8.11608	7.64827	7.23166	6.85828	6.52173	6.21682	5.93928	5.68559	5.45281	5.23844	5.04039	4.85687	4.68632	4.52743	4.37903	4.24012	4.10982	3.98735	3.87203	3.76325	3.66046	3.56319	3.47101	3.38351	3.30036	3.22124
							11	481.694	102.5	57.4608	39.9263	30.595	24.8017	20.8548	17.993	15.8228	14.1206	12.7497	11.622	10.678	9.87624	9.18682	8.58766	8.06214	7.59745	7.18362	6.81273	6.47843	6.17555	5.89987	5.64787	5.41664	5.2037	5.00698	4.82468	4.65527	4.49744	4.35003	4.21205	4.08262	3.96097	3.84642	3.73836	3.63626	3.53964	3.44807	3.36116	3.27856	3.19997
							11.5	478.737	101.872	57.1083	39.6814	30.4074	24.6496	20.727	17.8827	15.7259	14.0341	12.6716	11.5508	10.6127	9.81582	9.13063	8.53515	8.01285	7.55102	7.13973	6.77112	6.43887	6.13785	5.86386	5.61341	5.3836	5.17197	4.97645	4.79527	4.6269	4.47004	4.32354	4.1864	4.05777	3.93686	3.82302	3.71562	3.61415	3.51812	3.42711	3.34074	3.25865	3.18054
							12	476.025	101.295	56.785	39.4568	30.2354	24.5102	20.6098	17.7816	15.637	13.9548	12.6	11.4856	10.5527	9.76041	9.0791	8.48699	7.96765	7.50844	7.09948	6.73295	6.40258	6.10327	5.83083	5.5818	5.35329	5.14286	4.94845	4.7683	4.60088	4.44491	4.29924	4.16288	4.03497	3.91476	3.80155	3.69477	3.59387	3.49839	3.40789	3.322	3.24038	3.16272
							12.5	473.529	100.764	56.4874	39.2501	30.077	24.3818	20.5019	17.6885	15.5551	13.8818	12.5341	11.4255	10.4976	9.7094	9.03166	8.44266	7.92604	7.46924	7.06242	6.69782	6.36918	6.07144	5.80043	5.55271	5.3254	5.11607	4.92268	4.74347	4.57693	4.42178	4.27687	4.14123	4.01399	3.8944	3.78179	3.67557	3.5752	3.48022	3.3902	3.30476	3.22357	3.14631
							13	471.224	100.273	56.2125	39.0591	29.9307	24.2633	20.4022	17.6026	15.4796	13.8143	12.4733	11.3701	10.4466	9.66228	8.98785	8.40172	7.88761	7.43303	7.0282	6.66537	6.33833	6.04204	5.77235	5.52584	5.29963	5.09132	4.89887	4.72054	4.55481	4.40041	4.25621	4.12123	3.99461	3.87561	3.76355	3.65784	3.55796	3.46344	3.37386	3.28884	3.20804	3.13116
							13.5	469.088	99.8188	55.9579	38.8823	29.7952	24.1535	20.3099	17.5229	15.4095	13.7519	12.4169	11.3187	10.3994	9.61864	8.94726	8.36378	7.85201	7.39949	6.99649	6.63531	6.30976	6.01481	5.74634	5.50094	5.27576	5.0684	4.87682	4.69929	4.53432	4.38062	4.23707	4.1027	3.97666	3.85819	3.74664	3.64141	3.54199	3.44789	3.35872	3.27408	3.19365	3.11712
							14	467.103	99.3967	55.7213	38.7179	29.6693	24.0514	20.2241	17.4489	15.3445	13.6938	12.3645	11.2709	10.3556	9.57809	8.90955	8.32854	7.81894	7.36833	6.96704	6.60738	6.28321	5.9895	5.72217	5.47781	5.25359	5.0471	4.85634	4.67956	4.51528	4.36223	4.21929	4.08549	3.95998	3.84202	3.73094	3.62615	3.52715	3.43345	3.34465	3.26038	3.18029	3.10408
							14.5	465.255	99.0034	55.501	38.5648	29.552	23.9564	20.1442	17.38	15.2839	13.6398	12.3157	11.2265	10.3147	9.54031	8.87442	8.29572	7.78813	7.3393	6.9396	6.58137	6.25847	5.96594	5.69966	5.45627	5.23293	5.02726	4.83725	4.66117	4.49755	4.3451	4.20273	4.06946	3.94444	3.82695	3.71631	3.61194	3.51332	3.42	3.33155	3.24761	3.16783	3.09193
							15	463.529	98.6363	55.2952	38.4219	29.4425	23.8676	20.0696	17.3156	15.2273	13.5893	12.2701	11.1849	10.2766	9.50504	8.84162	8.26506	7.75936	7.3122	6.91398	6.55708	6.23538	5.94393	5.67864	5.43615	5.21364	5.00874	4.81943	4.644	4.48099	4.32911	4.18726	4.05449	3.92994	3.81287	3.70264	3.59866	3.50041	3.40744	3.31932	3.23569	3.15621	3.08058
							15.5	461.914	98.2926	55.1026	38.2881	29.34	23.7846	19.9997	17.2554	15.1743	13.542	12.2275	11.1461	10.2409	9.47203	8.81092	8.23637	7.73243	7.28683	6.89	6.53434	6.21377	5.92333	5.65897	5.41732	5.19559	4.9914	4.80275	4.62794	4.46549	4.31414	4.17279	4.04047	3.91636	3.7997	3.68986	3.58624	3.48833	3.39568	3.30787	3.22453	3.14533	3.06996
							16	460.399	97.9703	54.9219	38.1626	29.2439	23.7066	19.9342	17.1989	15.1247	13.4977	12.1875	11.1096	10.2074	9.44107	8.78213	8.20947	7.70718	7.26304	6.86751	6.51302	6.19349	5.90401	5.64051	5.39966	5.17866	4.97514	4.78711	4.61287	4.45095	4.3001	4.15921	4.02733	3.90362	3.78735	3.67786	3.57459	3.477	3.38465	3.29713	3.21406	3.13512	3.06
							16.5	458.975	97.6674	54.7522	38.0447	29.1536	23.6334	19.8727	17.1458	15.078	13.4561	12.1499	11.0753	10.1759	9.41197	8.75507	8.18418	7.68344	7.24068	6.84637	6.49297	6.17444	5.88585	5.62317	5.38307	5.16274	4.95985	4.7724	4.5987	4.43729	4.2869	4.14645	4.01498	3.89165	3.77574	3.66659	3.56363	3.46635	3.37429	3.28704	3.20423	3.12553	3.05064
							17			54.5923	37.9336	29.0685	23.5645	19.8147	17.0958	15.034	13.4169	12.1145	11.0431	10.1463	9.38457	8.72959	8.16036	7.66109	7.21962	6.82646	6.4741	6.1565	5.86875	5.60684	5.36744	5.14776	4.94546	4.75856	4.58537	4.42442	4.27448	4.13443	4.00335	3.88038	3.76481	3.65598	3.55332	3.45632	3.36453	3.27753	3.19496	3.1165	3.04183
							17.5					28.9882	23.4994	19.76	17.0486	14.9926	13.3799	12.0811	11.0127	10.1183	9.35872	8.70555	8.1379	7.64001	7.19976	6.80769	6.4563	6.13958	5.85263	5.59144	5.3527	5.13362	4.93188	4.7455	4.57279	4.41229	4.26275	4.1231	3.99238	3.86975	3.7545	3.64597	3.54359	3.44686	3.35532	3.26857	3.18623	3.10798	3.03352
							18							19.7084	17.0041	14.9534	13.3449	12.0495	10.9839	10.0919	9.3343	8.68284	8.11668	7.62009	7.18099	6.78995	6.43948	6.12359	5.83739	5.57688	5.33877	5.12027	4.91906	4.73316	4.5609	4.40082	4.25168	4.11239	3.98201	3.85971	3.74476	3.63651	3.5344	3.43793	3.34663	3.2601	3.17797	3.09993	3.02566
							18.5								16.9619	14.9163	13.3118	12.0197	10.9567	10.0669	9.31119	8.66135	8.09659	7.60124	7.16323	6.77316	6.42357	6.10845	5.82297	5.56311	5.32559	5.10763	4.90692	4.72149	4.54965	4.38997	4.2412	4.10226	3.9722	3.8502	3.73553	3.62756	3.52571	3.42947	3.3384	3.25208	3.17016	3.09231	3.01823
							19										13.2805	11.9914	10.9309	10.0432	9.28929	8.64098	8.07756	7.58337	7.1464	6.75725	6.40848	6.09411	5.8093	5.55006	5.31309	5.09565	4.89541	4.71042	4.53899	4.37969	4.23127	4.09265	3.9629	3.84119	3.7268	3.61908	3.51746	3.42145	3.33059	3.24448	3.16276	3.08509	3.01119
							19.5											11.9645	10.9064	10.0207	9.2685	8.62165	8.05949	7.56642	7.13043	6.74215	6.39416	6.0805	5.79633	5.53767	5.30124	5.08428	4.8845	4.69992	4.52887	4.36993	4.22184	4.08354	3.95408	3.83264	3.7185	3.61102	3.50964	3.41385	3.32319	3.23727	3.15573	3.07824	3.0045
							20												10.8832	9.99938	9.24874	8.60328	8.04232	7.5503	7.11524	6.7278	6.38056	6.06757	5.784	5.52589	5.28997	5.07348	4.87412	4.68994	4.51926	4.36065	4.21288	4.07487	3.94569	3.82451	3.71062	3.60337	3.5022	3.40661	3.31615	3.23042	3.14905	3.07172	2.99814
							20.5														9.22994	8.58579	8.02598	7.53497	7.1008	6.71414	6.36761	6.05526	5.77227	5.51469	5.27924	5.0632	4.86424	4.68044	4.51011	4.35182	4.20436	4.06663	3.93771	3.81678	3.70312	3.59609	3.49513	3.39973	3.30946	3.2239	3.1427	3.06553	2.9921
							21															8.56913	8.01041	7.52036	7.08703	6.70113	6.35527	6.04353	5.76109	5.50401	5.26903	5.0534	4.85484	4.67139	4.50139	4.34341	4.19623	4.05878	3.93011	3.80941	3.69597	3.58915	3.48839	3.39318	3.30308	3.21769	3.13664	3.05962	2.98634
							21.5																7.99557	7.50642	7.0739	6.68872	6.3435	6.03234	5.75043	5.49383	5.25928	5.04406	4.84586	4.66275	4.49307	4.33539	4.18849	4.05128	3.92286	3.80239	3.68916	3.58253	3.48196	3.38693	3.29699	3.21176	3.13087	3.05399	2.98084
							22																	7.49311	7.06136	6.67687	6.33227	6.02166	5.74025	5.48411	5.24998	5.03513	4.83729	4.65451	4.48513	4.32773	4.18109	4.04413	3.91593	3.79567	3.68265	3.57621	3.47582	3.38095	3.29118	3.2061	3.12535	3.04861	2.97559
							22.5																		7.04938	6.66554	6.32153	6.01145	5.73052	5.47481	5.24108	5.02661	4.8291	4.64663	4.47754	4.32041	4.17401	4.03729	3.90931	3.78926	3.67642	3.57017	3.46995	3.37525	3.28563	3.20069	3.12008	3.04347	2.97058
							23																			6.6547	6.31125	6.00168	5.72121	5.46592	5.23257	5.01844	4.82126	4.63909	4.47028	4.3134	4.16725	4.03075	3.90297	3.78312	3.67047	3.56439	3.46433	3.36979	3.28031	3.19552	3.11504	3.03855	2.96578
							23.5																				6.3014	5.99232	5.71229	5.4574	5.22442	5.01063	4.81376	4.63187	4.46332	4.30669	4.16077	4.02448	3.89691	3.77724	3.66477	3.55886	3.45895	3.36455	3.27522	3.19056	3.1102	3.03384	2.96118
							24																					5.98335	5.70374	5.44924	5.2166	5.00313	4.80656	4.62495	4.45665	4.30026	4.15455	4.01847	3.89109	3.77161	3.6593	3.55355	3.4538	3.35954	3.27034	3.1858	3.10557	3.02932	2.95677
							24.5																						5.69553	5.4414	5.2091	4.99594	4.79965	4.6183	4.45025	4.29409	4.14859	4.01271	3.88551	3.7662	3.65406	3.54846	3.44885	3.35473	3.26566	3.18124	3.10113	3.02499	2.95254
							25																							5.43388	5.2019	4.98904	4.79302	4.61192	4.44411	4.28816	4.14286	4.00717	3.88015	3.761	3.64902	3.54357	3.4441	3.35011	3.26116	3.17686	3.09686	3.02083	2.94848
							25.5																								5.19498	4.9824	4.78665	4.60579	4.4382	4.28246	4.13736	4.00185	3.875	3.75601	3.64418	3.53887	3.43953	3.34567	3.25684	3.17266	3.09276	3.01683	2.94458
							26																								5.18832	4.97602	4.78052	4.5999	4.43252	4.27698	4.13207	3.99673	3.87005	3.75121	3.63952	3.53435	3.43514	3.34139	3.25268	3.16861	3.08881	3.01298	2.94082
							26.5																									4.96988	4.77462	4.59422	4.42705	4.27171	4.12697	3.9918	3.86528	3.74659	3.63504	3.52999	3.43091	3.33728	3.24868	3.16471	3.08501	3.00928	2.93721
							27																										4.76893	4.58875	4.42178	4.26662	4.12207	3.98706	3.86068	3.74214	3.63072	3.5258	3.42683	3.33332	3.24483	3.16096	3.08136	3.00571	2.93373
							27.5																										4.76345	4.58348	4.4167	4.26173	4.11733	3.98248	3.85625	3.73785	3.62656	3.52176	3.42291	3.3295	3.24111	3.15734	3.07783	3.00227	2.93037
							28																											4.5784	4.41181	4.257	4.11277	3.97807	3.85198	3.73371	3.62254	3.51786	3.41912	3.32582	3.23753	3.15385	3.07443	2.99895	2.92714
							28.5																												4.40708	4.25244	4.10837	3.97381	3.84786	3.72971	3.61867	3.5141	3.41546	3.32227	3.23407	3.15048	3.07115	2.99575	2.92401
							29																												4.40251	4.24804	4.10411	3.9697	3.84388	3.72585	3.61492	3.51047	3.41193	3.31883	3.23073	3.14722	3.06797	2.99266	2.92099
							29.5																													4.24378	4.1	3.96572	3.84003	3.72212	3.61131	3.50696	3.40852	3.31551	3.2275	3.14408	3.06491	2.98967	2.91808
							30																														4.09603	3.96188	3.83631	3.71852	3.60781	3.50356	3.40522	3.31231	3.22438	3.14104	3.06195	2.98678	2.91526
[truncated: 19 more columns]

## Sheet: VVM=1
							* 99999 denote scenarios where the corresponding configuration is infeasible
								Config 1	Config 2	Config 3	Infeasible
								Yield (g/g)
							Min $/kg	0.00144	0.006769	0.012078	0.017387	0.022696	0.028005	0.033314	0.038623	0.043932	0.049241	0.05455	0.059859	0.065168	0.070477	0.075786	0.081095	0.086404	0.091713	0.097022	0.102331	0.10764	0.112949	0.118258	0.123567	0.128876	0.134185	0.139494	0.144803	0.150112	0.155421	0.16073	0.166039	0.171348	0.176657	0.181966	0.187275	0.192584	0.197893	0.203202	0.208511	0.21382	0.219129
						concentration (wt%)	1	4572.59	972.821	545.249	378.789	290.205	235.208	197.739	170.571	149.97	133.81	120.797	110.091	101.13	93.5188	86.9741	81.2863	76.2974	71.8861	67.9576	64.4367	61.2632	58.3879	55.7709	53.3787	51.1836	49.1622	47.2946	45.564	43.9559	42.4575	41.0582	39.7484	38.5197	37.3648	36.2774	35.2516	34.2824	33.3651	32.4958	31.6708	30.8867	30.1407
							1.5	3186.57	677.967	380.001	263.999	202.266	163.94	137.828	118.896	104.539	93.2778	84.2087	76.7483	70.5034	65.1994	60.6385	56.6748	53.1982	50.1241	47.3864	44.9327	42.7211	40.7174	38.8937	37.2266	35.6969	34.2882	32.9868	31.7807	30.66	29.6159	28.6407	27.7279	26.8717	26.0669	25.3091	24.5942	23.9188	23.2796	22.6738	22.0988	21.5524	21.0325
							2	2493.51	530.528	297.37	206.598	158.293	128.302	107.871	93.0558	81.8216	73.0098	65.9133	60.0755	55.1889	51.0386	47.4697	44.3681	41.6476	39.2421	37.0999	35.1799	33.4493	31.8815	30.4544	29.1499	27.9529	26.8506	25.8322	24.8885	24.0116	23.1945	22.4314	21.7172	21.0472	20.4174	19.8244	19.2651	18.7365	18.2364	17.7623	17.3124	16.8849	16.478
							2.5	2077.64	442.058	247.788	172.156	131.907	106.919	89.8946	77.5507	68.1902	60.8482	54.9352	50.0712	45.9996	42.5414	39.5678	36.9835	34.7168	32.7125	30.9276	29.3278	27.8859	26.5795	25.3904	24.3035	23.3062	22.3877	21.5392	20.7529	20.0222	19.3414	18.7056	18.1105	17.5522	17.0275	16.5334	16.0674	15.627	15.2102	14.8153	14.4404	14.0842	13.7452
							3	1800.37	383.075	214.731	149.193	114.316	92.662	77.9099	67.2134	59.1022	52.7399	47.6161	43.4012	39.873	36.8764	34.2996	32.0602	30.096	28.3592	26.8124	25.4262	24.1767	23.0447	22.0143	21.0724	20.2082	19.4123	18.677	17.9956	17.3625	16.7726	16.2216	15.7059	15.2221	14.7675	14.3393	13.9354	13.5538	13.1927	12.8504	12.5256	12.2169	11.9232
							3.5	1602.32	340.941	191.118	132.79	101.75	82.4781	69.349	59.8292	52.6103	46.948	42.3879	38.6367	35.4966	32.8297	30.5364	28.5433	26.7952	25.2495	23.8729	22.6392	21.5271	20.5196	19.6026	18.7644	17.9952	17.2869	16.6325	16.0261	15.4626	14.9376	14.4472	13.9882	13.5577	13.153	12.772	12.4126	12.0729	11.7515	11.4469	11.1578	10.8831	10.6217
							4	1453.77	309.34	173.407	120.487	92.3245	74.8398	62.928	54.2908	47.7412	42.6039	38.4665	35.0631	32.2142	29.7945	27.7138	25.9056	24.3195	22.9171	21.6681	20.5488	19.5399	18.6258	17.7938	17.0332	16.3354	15.6927	15.099	14.5488	14.0376	13.5612	13.1164	12.6999	12.3093	11.9422	11.5965	11.2703	10.9622	10.6706	10.3942	10.1319	9.88267	9.64548
							4.5	1338.23	284.76	159.632	110.918	84.9936	68.8987	57.9336	49.983	43.9539	39.225	35.4165	32.2835	29.6611	27.4337	25.5184	23.8539	22.3939	21.1029	19.9533	18.9229	17.9941	17.1527	16.3868	15.6868	15.0444	14.4528	13.9063	13.3998	12.9292	12.4907	12.0812	11.6979	11.3383	11.0003	10.6821	10.3819	10.0983	9.82984	9.57544	9.33399	9.10454	8.8862
							5	1245.79	265.095	148.611	103.262	79.1287	64.1456	53.9379	46.5365	40.924	36.5217	32.9763	30.0598	27.6185	25.545	23.762	22.2124	20.8533	19.6515	18.5813	17.6221	16.7575	15.9742	15.2612	14.6095	14.0115	13.4608	12.952	12.4806	12.0425	11.6343	11.253	10.8962	10.5615	10.2468	9.95059	9.67113	9.40708	9.1572	8.92038	8.69561	8.48201	8.27875
							5.5	1170.15	249.005	139.593	96.9977	74.3299	60.2565	50.6686	43.7166	38.4449	34.3099	30.9797	28.2403	25.9472	23.9996	22.3249	20.8694	19.5928	18.464	17.4587	16.5578	15.7457	15.0099	14.3403	13.7281	13.1664	12.6492	12.1713	11.7284	11.3169	10.9335	10.5754	10.2402	9.92584	9.63033	9.35206	9.08957	8.84155	8.60684	8.3844	8.17328	7.97264	7.78173
							6	1107.12	235.596	132.078	91.7774	70.3307	57.0155	47.9441	41.3666	36.3788	32.4666	29.3159	26.724	24.5544	22.7118	21.1272	19.7502	18.5423	17.4744	16.5232	15.6708	14.9025	14.2064	13.5728	12.9936	12.4621	11.9727	11.5206	11.1016	10.7123	10.3495	10.0107	9.69361	9.39614	9.11654	8.85327	8.60492	8.37026	8.14819	7.93773	7.73798	7.54816	7.36753
							6.5	1053.79	224.25	125.719	87.3601	66.9467	54.273	45.6387	39.3781	34.6306	30.9068	27.9079	25.4409	23.3759	21.622	20.1138	18.8031	17.6535	16.6369	15.7316	14.9203	14.189	13.5264	12.9233	12.372	11.8662	11.4004	10.97	10.5712	10.2006	9.85536	9.53289	9.23105	8.94791	8.68179	8.4312	8.19481	7.97146	7.76009	7.55977	7.36965	7.18897	7.01704
							7	1008.07	214.524	120.269	83.5737	64.046	51.9222	43.6625	37.6736	33.1321	29.5699	26.7011	24.3411	22.3657	20.6879	19.2451	17.9913	16.8915	15.9191	15.0531	14.2769	13.5774	12.9435	12.3666	11.8393	11.3554	10.9098	10.4981	10.1166	9.76207	9.43178	9.12331	8.83456	8.5637	8.30913	8.06941	7.84328	7.62962	7.42742	7.23579	7.05392	6.88108	6.71661
							7.5	968.444	206.095	115.545	80.2921	61.532	49.8848	41.9498	36.1963	31.8333	28.4111	25.6551	23.3879	21.4901	19.8783	18.4923	17.2877	16.2312	15.297	14.465	13.7194	13.0473	12.4384	11.8841	11.3775	10.9126	10.4846	10.0891	9.72256	9.38198	9.06467	8.76832	8.49092	8.23072	7.98615	7.75585	7.53861	7.33335	7.1391	6.955	6.78028	6.61423	6.45623
							8	933.773	198.719	111.411	77.4206	59.3322	48.102	40.4511	34.9036	30.6968	27.3972	24.7398	22.5538	20.724	19.1699	17.8335	16.6721	15.6534	14.7526	13.9504	13.2315	12.5834	11.9963	11.4619	10.9735	10.5252	10.1125	9.73115	9.37777	9.04938	8.74344	8.4577	8.19023	7.93934	7.70353	7.48148	7.27202	7.07411	6.88681	6.70931	6.54084	6.38074	6.22839
							8.5	903.179	192.21	107.763	74.8868	57.3912	46.5289	39.1287	33.763	29.6941	26.5025	23.9322	21.8179	20.048	18.5448	17.2522	16.1288	15.1435	14.2722	13.4964	12.801	12.1742	11.6063	11.0894	10.617	10.1834	9.78418	9.41533	9.07353	8.75591	8.45999	8.18361	7.92491	7.68224	7.45416	7.23938	7.03679	6.84536	6.6642	6.49251	6.32956	6.17471	6.02736
							9	875.984	186.425	104.521	72.6345	55.6657	45.1306	37.9532	32.749	28.8027	25.7073	23.2144	21.1637	19.4471	17.9891	16.7355	15.6459	14.6903	13.8453	13.0927	12.4183	11.8104	11.2596	10.7583	10.3	9.87955	9.49234	9.1346	8.8031	8.49504	8.20803	7.93997	7.68906	7.4537	7.23249	7.02418	6.82768	6.64202	6.46632	6.2998	6.14176	5.99156	5.84865
							9.5	851.651	181.249	101.62	70.6192	54.1218	43.8794	36.9014	31.8418	28.0051	24.9957	22.572	20.5783	18.9094	17.492	16.2731	15.2138	14.2847	13.4632	12.7316	12.0759	11.4848	10.9494	10.462	10.0165	9.60767	9.23122	8.88342	8.56112	8.26162	7.98258	7.72198	7.47804	7.24921	7.03414	6.83162	6.64058	6.46008	6.28926	6.12736	5.97371	5.82769	5.68875
							10	829.751	176.59	99.0088	68.8055	52.7323	42.7533	35.9548	31.0253	27.2872	24.3552	21.9939	20.0515	18.4255	17.0445	15.857	14.825	13.9198	13.1194	12.4065	11.7677	11.1919	10.6702	10.1953	9.76126	9.36297	8.9962	8.65734	8.34334	8.05154	7.77968	7.52577	7.28811	7.06517	6.85563	6.65832	6.47219	6.29633	6.1299	5.97217	5.82247	5.68021	5.54484
							10.5	809.936	172.374	96.6463	67.1644	51.4751	41.7344	35.0983	30.2865	26.6377	23.7758	21.4708	19.5748	17.9877	16.6396	15.4805	14.4731	13.5895	12.8082	12.1125	11.4889	10.9268	10.4176	9.95404	9.53035	9.14157	8.78356	8.4528	8.14629	7.86146	7.59609	7.34825	7.11626	6.89865	6.69411	6.50151	6.31983	6.14817	5.98572	5.83176	5.68563	5.54677	5.41463
							11	791.921	168.542	94.4986	65.6724	50.3322	40.8081	34.3196	29.6149	26.0473	23.249	20.9953	19.1414	17.5896	16.2716	15.1382	14.1532	13.2893	12.5254	11.8451	11.2354	10.6858	10.1879	9.73469	9.32043	8.9403	8.59025	8.26684	7.96715	7.68866	7.42919	7.18686	6.96003	6.74726	6.54728	6.35896	6.18132	6.01348	5.85464	5.7041	5.56123	5.42545	5.29625
							11.5	775.473	165.043	92.5376	64.3102	49.2886	39.9624	33.6087	29.0017	25.5081	22.7679	20.5611	18.7457	17.2262	15.9355	14.8257	13.8612	13.0152	12.2671	11.601	11.0039	10.4658	9.9782	9.53441	9.12875	8.75652	8.41374	8.09705	7.80358	7.53088	7.2768	7.03951	6.81739	6.60904	6.41321	6.2288	6.05485	5.8905	5.73496	5.58755	5.44764	5.31468	5.18817
							12	760.395	161.835	90.7399	63.0614	48.3319	39.1871	32.9569	28.4395	25.0139	22.327	20.1631	18.383	16.893	15.6274	14.5392	13.5934	12.7639	12.0304	11.3772	10.7917	10.2641	9.78597	9.35081	8.95304	8.58805	8.25193	7.94141	7.65365	7.38624	7.13711	6.90443	6.68663	6.48233	6.2903	6.10949	5.93892	5.77776	5.62525	5.4807	5.34352	5.21314	5.08909
							12.5	746.524	158.884	89.086	61.9126	47.4518	38.4738	32.3573	27.9223	24.5592	21.9214	19.7969	18.0493	16.5865	15.344	14.2756	13.3471	12.5327	11.8126	11.1713	10.5965	10.0785	9.60912	9.1819	8.79139	8.43305	8.10307	7.79821	7.5157	7.25318	7.00858	6.78015	6.56633	6.36575	6.17723	5.99972	5.83226	5.67404	5.52431	5.3824	5.24772	5.11973	4.99793
							13	733.718	156.16	87.5593	60.852	46.6394	37.8154	31.8038	27.4449	24.1395	21.5469	19.4589	17.7413	16.3035	15.0824	14.0323	13.1197	12.3193	11.6116	10.9813	10.4164	9.90718	9.44587	9.02598	8.64217	8.28998	7.96566	7.66603	7.38836	7.13034	6.88995	6.66543	6.45528	6.25814	6.07286	5.89838	5.7338	5.5783	5.43113	5.29166	5.15929	5.03349	4.91379
							13.5	721.862	153.638	86.1457	59.87	45.8871	37.2057	31.2913	27.0028	23.7509	21.2001	19.1459	17.456	16.0415	14.8401	13.807	12.9092	12.1217	11.4254	10.8053	10.2495	9.74856	9.29471	8.8816	8.504	8.1575	7.83842	7.54363	7.27046	7.0166	6.7801	6.55921	6.35245	6.1585	5.97621	5.80456	5.64264	5.48964	5.34486	5.20764	5.07741	4.95364	4.83588
							14	710.851	151.296	84.833	58.9582	45.1885	36.6396	30.8154	26.5924	23.39	20.8782	18.8553	17.1912	15.7982	14.6152	13.5978	12.7137	11.9382	11.2525	10.6419	10.0946	9.60127	9.15434	8.74754	8.37569	8.03448	7.72027	7.42998	7.16097	6.91099	6.67809	6.46057	6.25697	6.06598	5.88647	5.71743	5.55798	5.40732	5.26475	5.12962	5.00137	4.8795	4.76353
							14.5	700.6	149.115	83.6108	58.1092	44.5381	36.1125	30.3723	26.2102	23.054	20.5784	18.5847	16.9446	15.5717	14.4057	13.4031	12.5317	11.7674	11.0916	10.4897	9.95033	9.46414	9.02365	8.62272	8.25623	7.91994	7.61027	7.32416	7.05903	6.81266	6.58311	6.36874	6.16807	5.97983	5.80291	5.63631	5.47916	5.33068	5.19016	5.05698	4.93058	4.81046	4.69617
							15	691.032	147.08	82.4701	57.3168	43.9311	35.6205	29.9587	25.8534	22.7404	20.2986	18.3321	16.7144	15.3603	14.2102	13.2213	12.3618	11.6079	10.9414	10.3477	9.8157	9.33615	8.90168	8.50622	8.14474	7.81304	7.50759	7.22539	6.96389	6.72088	6.49447	6.28302	6.08509	5.89943	5.72492	5.5606	5.4056	5.25914	5.12054	4.98918	4.86451	4.74603	4.63329
							15.5	682.082	145.175	81.4029	56.5755	43.3632	35.1603	29.5718	25.5197	22.447	20.0368	18.0958	16.4991	15.1625	14.0273	13.0512	12.2029	11.4588	10.8008	10.2149	9.68974	9.21641	8.78757	8.39723	8.04043	7.71303	7.41154	7.133	6.87488	6.63502	6.41154	6.20283	6.00747	5.82421	5.65197	5.48977	5.33678	5.19221	5.05541	4.92575	4.8027	4.68575	4.57448
							16	673.69	143.39	80.4025	55.8805	42.8307	34.7288	29.2091	25.2069	22.1719	19.7914	17.8743	16.2972	14.9771	13.8559	12.8917	12.0538	11.3189	10.6691	10.0903	9.57166	9.10415	8.68058	8.29505	7.94264	7.61927	7.32149	7.04637	6.79143	6.55452	6.3338	6.12765	5.93469	5.75369	5.58357	5.42337	5.27225	5.12947	4.99435	4.86629	4.74475	4.62924	4.51934
							16.5	665.807	141.713	79.4626	55.2276	42.3306	34.3234	28.8684	24.913	21.9136	19.5609	17.6662	16.1076	14.8029	13.6948	12.742	11.9139	11.1875	10.5453	9.97334	9.46074	8.99869	8.58009	8.19906	7.85078	7.5312	7.2369	6.965	6.71304	6.4789	6.26076	6.05703	5.86633	5.68744	5.51931	5.36099	5.21164	5.07053	4.93699	4.81043	4.69031	4.57616	4.46754
							17	658.387	140.135	78.578	54.6131	41.8598	33.9419	28.5477	24.6363	21.6704	19.3439	17.4704	15.9291	14.639	13.5432	12.601	11.7821	11.0639	10.4288	9.86323	9.35633	8.89944	8.4855	8.10872	7.76432	7.4483	7.15728	6.88841	6.63926	6.40773	6.19202	5.99056	5.80199	5.62509	5.45884	5.30228	5.1546	5.01506	4.883	4.75785	4.63907	4.52619	4.41878
							17.5	651.392	138.647	77.744	54.0337	41.416	33.5822	28.2453	24.3755	21.4411	19.1394	17.2857	15.7608	14.4844	13.4003	12.4681	11.6579	10.9473	10.319	9.7594	9.25789	8.80585	8.39631	8.02354	7.6828	7.37013	7.08221	6.8162	6.5697	6.34063	6.12721	5.92789	5.74132	5.56631	5.40181	5.24692	5.10081	4.96275	4.8321	4.70828	4.59076	4.47908	4.37281
							18	644.785	137.241	76.9562	53.4865	40.9968	33.2425	27.9597	24.1292	21.2245	18.9461	17.1113	15.6019	14.3384	13.2653	12.3425	11.5406	10.8372	10.2152	9.66134	9.16492	8.71747	8.31208	7.94309	7.60581	7.29631	7.01131	6.748	6.50399	6.27725	6.066	5.8687	5.68402	5.51078	5.34796	5.19464	5.05001	4.91335	4.78403	4.66146	4.54514	4.43459	4.3294
							18.5	638.534	135.911	76.2111	52.9689	40.6002	32.9211	27.6895	23.8962	21.0196	18.7634	16.9463	15.4515	14.2003	13.1376	12.2238	11.4296	10.733	10.1171	9.56858	9.07697	8.63386	8.2324	7.86699	7.53297	7.22648	6.94424	6.68348	6.44184	6.2173	6.00809	5.81271	5.62982	5.45826	5.29702	5.14518	5.00195	4.86662	4.73855	4.61717	4.50198	4.3925	4.28833
							19	632.613	134.652	75.5051	52.4785	40.2245	32.6166	27.4336	23.6754	20.8255	18.5902	16.79	15.3091	14.0695	13.0166	12.1113	11.3245	10.6344	10.0241	9.4807	8.99365	8.55465	8.15691	7.79489	7.46397	7.16032	6.8807	6.62236	6.38296	6.1605	5.95323	5.75966	5.57847	5.4085	5.24875	5.09832	4.95642	4.82235	4.69547	4.57522	4.46109	4.35263	4.24942
							19.5	626.995	133.457	74.8353	52.0132	39.8681	32.3278	27.1907	23.466	20.6414	18.4259	16.6417	15.1739	13.9453	12.9018	12.0045	11.2247	10.5407	9.93593	9.39732	8.9146	8.47949	8.08529	7.72648	7.39851	7.09755	6.82041	6.56437	6.3271	6.10661	5.90119	5.70933	5.52975	5.36129	5.20296	5.05387	4.91323	4.78035	4.65459	4.53541	4.42229	4.3148	4.21251
							20	621.658	132.321	74.199	51.5712	39.5295	32.0534	26.9601	23.267	20.4665	18.2699	16.5008	15.0456	13.8274	12.7928	11.9031	11.13	10.4518	9.85214	9.31812	8.8395	8.4081	8.01725	7.6615	7.33632	7.03792	6.76314	6.50928	6.27403	6.05542	5.85174	5.66152	5.48347	5.31645	5.15946	5.01164	4.8722	4.74044	4.61576	4.49759	4.38544	4.27886	4.18555
							20.5	616.582	131.241	73.5938	51.1508	39.2074	31.7923	26.7406	23.0777	20.3001	18.1214	16.3668	14.9234	13.7152	12.6891	11.8067	11.0398	10.3672	9.77243	9.24277	8.76807	8.34019	7.95253	7.59969	7.27716	6.9812	6.70867	6.45687	6.22355	6.00672	5.80471	5.61604	5.43944	5.27378	5.11808	4.97147	4.83317	4.70249	4.57882	4.46162	4.35038	4.25275	4.15198
							21	611.747	130.213	73.0173	50.7503	38.9006	31.5437	26.5316	22.8974	20.1416	17.98	16.2392	14.8071	13.6084	12.5903	11.7148	10.954	10.2866	9.69652	9.17101	8.70003	8.27551	7.89089	7.54081	7.22082	6.92718	6.65678	6.40697	6.17547	5.96034	5.75992	5.57273	5.39751	5.23315	5.07867	4.93321	4.79599	4.66634	4.54364	4.42736	4.32504	4.21997	4.12
							21.5	607.137	129.232	72.4677	50.3685	38.6081	31.3067	26.3324	22.7256	19.9905	17.8452	16.1175	14.6962	13.5065	12.4961	11.6272	10.8721	10.2098	9.62414	9.10259	8.63516	8.21384	7.83212	7.48468	7.16709	6.87567	6.60731	6.35938	6.12962	5.91612	5.7172	5.53143	5.35753	5.19441	5.0411	4.89673	4.76054	4.63187	4.5101	4.40271	4.29299	4.18872	4.08951
							22	602.736	128.296	71.943	50.0041	38.3289	31.0804	26.1421	22.5615	19.8462	17.7165	16.0013	14.5904	13.4093	12.4062	11.5436	10.794	10.1364	9.55505	9.03728	8.57324	8.15497	7.77602	7.4311	7.11581	6.8265	6.56009	6.31395	6.08586	5.87391	5.67643	5.492	5.31937	5.15743	5.00523	4.86191	4.72671	4.59897	4.48108	4.37132	4.2624	4.15889	4.0604
							22.5	598.531	127.401	71.4416	49.6558	38.0621	30.8642	25.9604	22.4047	19.7084	17.5935	15.8903	14.4892	13.3164	12.3203	11.4637	10.7193	10.0664	9.48902	8.97487	8.51406	8.09871	7.72241	7.37989	7.06681	6.77952	6.51496	6.27054	6.04405	5.83357	5.63747	5.45433	5.2829	5.12209	4.97095	4.82863	4.69438	4.56753	4.45528	4.34132	4.23317	4.13038	4.03258
							23	594.508	126.546	70.9621	49.3226	37.8069	30.6573	25.7865	22.2547	19.5766	17.4759	15.7841	14.3924	13.2275	12.2381	11.3873	10.6479	9.99932	9.42587	8.91517	8.45746	8.0449	7.67113	7.33092	7.01994	6.73458	6.4718	6.22902	6.00405	5.79499	5.60021	5.4183	5.24802	5.08829	4.93817	4.7968	4.66345	4.54525	4.42582	4.31263	4.2052	4.10311	4.00597
							23.5	590.657	125.726	70.5029	49.0037	37.5626	30.4593	25.62	22.1111	19.4503	17.3633	15.6825	14.2998	13.1424	12.1594	11.3141	10.5795	9.93514	9.3654	8.85801	8.40327	7.99338	7.62203	7.28402	6.97506	6.69155	6.43047	6.18927	5.96575	5.75804	5.56453	5.3838	5.21462	5.05593	4.90678	4.76633	4.64164	4.51626	4.39761	4.28515	4.17843	4.077	3.98049
							24	586.966	124.941	70.0628	48.698	37.3284	30.2695	25.4605	21.9735	19.3294	17.2553	15.585	14.211	13.0608	12.084	11.244	10.5139	9.87363	9.30745	8.80323	8.35133	7.94401	7.57498	7.23908	6.93205	6.65031	6.39086	6.15117	5.92905	5.72264	5.53033	5.35073	5.18261	5.02491	4.87669	4.74493	4.61307	4.48847	4.37057	4.25882	4.15277	4.05198	3.95607
							24.5	583.426	124.188	69.6407	48.4048	37.1038	30.0875	25.3075	21.8415	19.2133	17.1518	15.4916	14.1258	12.9826	12.0116	11.1767	10.4511	9.81463	9.25187	8.75069	8.30152	7.89665	7.52985	7.19597	6.89079	6.61075	6.35287	6.11462	5.89385	5.68868	5.49754	5.31902	5.15191	4.99516	4.84784	4.71672	4.58566	4.46182	4.34463	4.23356	4.12815	4.02797	3.93265
							25	580.027	123.465	69.2355	48.1233	36.8881	29.9127	25.1606	21.7148	19.1019	17.0524	15.4019	14.0441	12.9075	11.9422	11.1121	10.3907	9.75799	9.1985	8.70025	8.25369	7.85119	7.48652	7.15459	6.85119	6.57278	6.3164	6.07954	5.86005	5.65608	5.46605	5.28857	5.12244	4.9666	4.82777	4.68964	4.55935	4.43624	4.31973	4.20931	4.10452	4.00493	3.91016
							25.5	576.761	122.77	68.8462	47.8528	36.6809	29.7448	25.0194	21.5931	18.9949	16.9569	15.3157	13.9655	12.8354	11.8755	11.0501	10.3327	9.70357	9.14724	8.65178	8.20774	7.8075	7.44489	7.11483	6.81313	6.5363	6.28136	6.04583	5.82758	5.62476	5.43579	5.25931	5.09412	4.94682	4.80096	4.66362	4.53406	4.41165	4.2958	4.18601	4.08181	3.98278	3.88855
							26	573.621	122.102	68.4718	47.5928	36.4817	29.5834	24.8837	21.476	18.892	16.8651	15.2328	13.89	12.766	11.8113	10.9904	10.277	9.65124	9.09794	8.60518	8.16356	7.7655	7.40486	7.0766	6.77655	6.50121	6.24767	6.01342	5.79635	5.59464	5.40671	5.23119	5.06689	4.92025	4.77519	4.6386	4.50975	4.38801	4.2728	4.16361	4.05997	3.96149	3.86778
							26.5	570.6	121.459	68.1116	47.3426	36.29	29.428	24.7531	21.3634	18.7929	16.7767	15.153	13.8173	12.6992	11.7496	10.933	10.2233	9.60089	9.0505	8.56034	8.12104	7.72508	7.36634	7.03981	6.74134	6.46745	6.21525	5.98223	5.76631	5.56566	5.37871	5.20412	5.04819	4.89468	4.75039	4.61452	4.48636	4.36526	4.25066	4.14204	4.03896	3.941	3.84778
							27	567.69	120.84	67.7647	47.1016	36.1054	29.2784	24.6273	21.2549	18.6975	16.6917	15.0762	13.7473	12.6349	11.6901	10.8777	10.1717	9.5524	9.00482	8.51716	8.0801	7.68616	7.32925	7.00438	6.70743	6.43495	6.18402	5.9522	5.73738	5.53775	5.35176	5.17805	5.02278	4.87005	4.72651	4.59133	4.46383	4.34335	4.22934	4.12128	4.01873	3.92127	3.82853
							27.5	564.886	120.244	67.4304	46.8694	35.9275	29.1342	24.5061	21.1504	18.6056	16.6097	15.0022	13.6799	12.573	11.6329	10.8245	10.1219	9.50567	8.96079	8.47555	8.04065	7.64865	7.2935	6.97024	6.67476	6.40362	6.15394	5.92326	5.7095	5.51085	5.32578	5.1603	4.99829	4.84632	4.70349	4.56899	4.44211	4.32224	4.20879	4.10127	3.99922	3.90225	3.80997
							28	562.183	119.669	67.108	46.6454	35.756	28.9952	24.3893	21.0495	18.517	16.5306	14.9308	13.6148	12.5132	11.5776	10.7731	10.0739	9.46061	8.91834	8.43542	8.0026	7.61248	7.25903	6.93732	6.64325	6.37341	6.12492	5.89535	5.68261	5.48492	5.30815	5.13591	4.97468	4.82344	4.68129	4.54744	4.42118	4.30187	4.18897	4.08197	3.98042	3.88391	3.79208
							28.5	559.574	119.114	66.797	46.4294	35.5904	28.861	24.2765	20.9523	18.4315	16.4543	14.862	13.5521	12.4556	11.5243	10.7235	10.0276	9.41714	8.87738	8.3967	7.96589	7.57758	7.22577	6.90555	6.61285	6.34426	6.09693	5.86842	5.65667	5.45989	5.2838	5.11236	4.95189	4.80136	4.65987	4.52665	4.40097	4.28223	4.16985	4.06335	3.96227	3.86621	3.77481
							29	557.055	118.578	66.4967	46.2207	35.4306	28.7315	24.1676	20.8584	18.3489	16.3806	14.7955	13.4915	12.3999	11.4728	10.6756	9.98283	9.37516	8.83783	8.35931	7.93045	7.54388	7.19366	6.87488	6.5835	6.31612	6.0699	5.84242	5.63162	5.44303	5.2603	5.08963	4.92989	4.78004	4.63919	4.50657	4.38146	4.26326	4.15139	4.04537	3.94475	3.84913	3.75814
							29.5	554.621	118.06	66.2065	46.0192	35.2762	28.6064	24.0624	20.7676	18.2692	16.3095	14.7312	13.4329	12.3462	11.4231	10.6294	9.93962	9.3346	8.79962	8.3232	7.8962	7.51133	7.16263	6.84525	6.55514	6.28893	6.04378	5.8173	5.60742	5.41952	5.23759	5.06767	4.90863	4.75944	4.61921	4.48717	4.36261	4.24493	4.13355	4.028	3.92782	3.83262	3.74203
							30	552.268	117.56	65.926	45.8243	35.1269	28.4854	23.9607	20.6799	18.1921	16.2407	14.6691	13.3763	12.2942	11.3751	10.5847	9.89785	9.29539	8.76269	8.28828	7.8631	7.47986	7.13264	6.81661	6.52772	6.26264	6.01854	5.79301	5.58712	5.39678	5.21563	5.04644	4.88807	4.73952	4.5999	4.46842	4.34439	4.22721	4.11631	4.01121	3.91146	3.81666	3.72645
							Config 1
							Row Labels	0.00144	0.006769	0.012078	0.017387	0.022696	0.028005	0.033314	0.038623	0.043932	0.049241	0.05455	0.059859	0.065168	0.070477	0.075786	0.081095	0.086404	0.091713	0.097022	0.102331	0.10764	0.112949	0.118258	0.123567	0.128876	0.134185	0.139494	0.144803	0.150112	0.155421	0.16073	0.166039	0.171348	0.176657	0.181966	0.187275	0.192584	0.197893	0.203202	0.208511	0.21382	0.219129
							1	4572.59	972.821	545.249	378.789	290.205	235.208	197.739	170.571	149.97	133.81	120.797	110.091	101.13	93.5188	86.9741	81.2863	76.2974	71.8861	67.9576	64.4367	61.2632	58.3879	55.7709	53.3787	51.1836	49.1622	47.2946	45.564	43.9559	42.4575	41.0582	39.7484	38.5197	37.3648	36.2774	35.2516	34.2824	33.3651	32.4958	31.6708	30.8867	30.1407
							1.5	3186.57	677.967	380.001	263.999	202.266	163.94	137.828	118.896	104.539	93.2778	84.2087	76.7483	70.5034	65.1994	60.6385	56.6748	53.1982	50.1241	47.3864	44.9327	42.7211	40.7174	38.8937	37.2266	35.6969	34.2882	32.9868	31.7807	30.66	29.6159	28.6407	27.7279	26.8717	26.0669	25.3091	24.5942	23.9188	23.2796	22.6738	22.0988	21.5524	21.0325
							2	2493.51	530.528	297.37	206.598	158.293	128.302	107.871	93.0558	81.8216	73.0098	65.9133	60.0755	55.1889	51.0386	47.4697	44.3681	41.6476	39.2421	37.0999	35.1799	33.4493	31.8815	30.4544	29.1499	27.9529	26.8506	25.8322	24.8885	24.0116	23.1945	22.4314	21.7172	21.0472	20.4174	19.8244	19.2651	18.7365	18.2364	17.7623	17.3124	16.8849	16.478
							2.5	2077.64	442.058	247.788	172.156	131.907	106.919	89.8946	77.5507	68.1902	60.8482	54.9352	50.0712	45.9996	42.5414	39.5678	36.9835	34.7168	32.7125	30.9276	29.3278	27.8859	26.5795	25.3904	24.3035	23.3062	22.3877	21.5392	20.7529	20.0222	19.3414	18.7056	18.1105	17.5522	17.0275	16.5334	16.0674	15.627	15.2102	14.8153	14.4404	14.0842	13.7452
							3	1800.37	383.075	214.731	149.193	114.316	92.662	77.9099	67.2134	59.1022	52.7399	47.6161	43.4012	39.873	36.8764	34.2996	32.0602	30.096	28.3592	26.8124	25.4262	24.1767	23.0447	22.0143	21.0724	20.2082	19.4123	18.677	17.9956	17.3625	16.7726	16.2216	15.7059	15.2221	14.7675	14.3393	13.9354	13.5538	13.1927	12.8504	12.5256	12.2169	11.9232
							3.5	1602.32	340.941	191.118	132.79	101.75	82.4781	69.349	59.8292	52.6103	46.948	42.3879	38.6367	35.4966	32.8297	30.5364	28.5433	26.7952	25.2495	23.8729	22.6392	21.5271	20.5196	19.6026	18.7644	17.9952	17.2869	16.6325	16.0261	15.4626	14.9376	14.4472	13.9882	13.5577	13.153	12.772	12.4126	12.0729	11.7515	11.4469	11.1578	10.8831	10.6217
							4	1453.77	309.34	173.407	120.487	92.3245	74.8398	62.928	54.2908	47.7412	42.6039	38.4665	35.0631	32.2142	29.7945	27.7138	25.9056	24.3195	22.9171	21.6681	20.5488	19.5399	18.6258	17.7938	17.0332	16.3354	15.6927	15.099	14.5488	14.0376	13.5612	13.1164	12.6999	12.3093	11.9422	11.5965	11.2703	10.9622	10.6706	10.3942	10.1319	9.88267	9.64548
							4.5	1338.23	284.76	159.632	110.918	84.9936	68.8987	57.9336	49.983	43.9539	39.225	35.4165	32.2835	29.6611	27.4337	25.5184	23.8539	22.3939	21.1029	19.9533	18.9229	17.9941	17.1527	16.3868	15.6868	15.0444	14.4528	13.9063	13.3998	12.9292	12.4907	12.0812	11.6979	11.3383	11.0003	10.6821	10.3819	10.0983	9.82984	9.57544	9.33399	9.10454	8.8862
							5	1245.79	265.095	148.611	103.262	79.1287	64.1456	53.9379	46.5365	40.924	36.5217	32.9763	30.0598	27.6185	25.545	23.762	22.2124	20.8533	19.6515	18.5813	17.6221	16.7575	15.9742	15.2612	14.6095	14.0115	13.4608	12.952	12.4806	12.0425	11.6343	11.253	10.8962	10.5615	10.2468	9.95059	9.67113	9.40708	9.1572	8.92038	8.69561	8.48201	8.27875
							5.5	1170.15	249.005	139.593	96.9977	74.3299	60.2565	50.6686	43.7166	38.4449	34.3099	30.9797	28.2403	25.9472	23.9996	22.3249	20.8694	19.5928	18.464	17.4587	16.5578	15.7457	15.0099	14.3403	13.7281	13.1664	12.6492	12.1713	11.7284	11.3169	10.9335	10.5754	10.2402	9.92584	9.63033	9.35206	9.08957	8.84155	8.60684	8.3844	8.17328	7.97264	7.78173
							6	1107.12	235.596	132.078	91.7774	70.3307	57.0155	47.9441	41.3666	36.3788	32.4666	29.3159	26.724	24.5544	22.7118	21.1272	19.7502	18.5423	17.4744	16.5232	15.6708	14.9025	14.2064	13.5728	12.9936	12.4621	11.9727	11.5206	11.1016	10.7123	10.3495	10.0107	9.69361	9.39614	9.11654	8.85327	8.60492	8.37026	8.14819	7.93773	7.73798	7.54816	7.36753
							6.5	1053.79	224.25	125.719	87.3601	66.9467	54.273	45.6387	39.3781	34.6306	30.9068	27.9079	25.4409	23.3759	21.622	20.1138	18.8031	17.6535	16.6369	15.7316	14.9203	14.189	13.5264	12.9233	12.372	11.8662	11.4004	10.97	10.5712	10.2006	9.85536	9.53289	9.23105	8.94791	8.68179	8.4312	8.19481	7.97146	7.76009	7.55977	7.36965	7.18897	7.01704
							7	1008.07	214.524	120.269	83.5737	64.046	51.9222	43.6625	37.6736	33.1321	29.5699	26.7011	24.3411	22.3657	20.6879	19.2451	17.9913	16.8915	15.9191	15.0531	14.2769	13.5774	12.9435	12.3666	11.8393	11.3554	10.9098	10.4981	10.1166	9.76207	9.43178	9.12331	8.83456	8.5637	8.30913	8.06941	7.84328	7.62962	7.42742	7.23579	7.05392	6.88108	6.71661
							7.5	968.444	206.095	115.545	80.2921	61.532	49.8848	41.9498	36.1963	31.8333	28.4111	25.6551	23.3879	21.4901	19.8783	18.4923	17.2877	16.2312	15.297	14.465	13.7194	13.0473	12.4384	11.8841	11.3775	10.9126	10.4846	10.0891	9.72256	9.38198	9.06467	8.76832	8.49092	8.23072	7.98615	7.75585	7.53861	7.33335	7.1391	6.955	6.78028	6.61423	6.45623
							8	933.773	198.719	111.411	77.4206	59.3322	48.102	40.4511	34.9036	30.6968	27.3972	24.7398	22.5538	20.724	19.1699	17.8335	16.6721	15.6534	14.7526	13.9504	13.2315	12.5834	11.9963	11.4619	10.9735	10.5252	10.1125	9.73115	9.37777	9.04938	8.74344	8.4577	8.19023	7.93934	7.70353	7.48148	7.27202	7.07411	6.88681	6.70931	6.54084	6.38074	6.22839
							8.5	903.179	192.21	107.763	74.8868	57.3912	46.5289	39.1287	33.763	29.6941	26.5025	23.9322	21.8179	20.048	18.5448	17.2522	16.1288	15.1435	14.2722	13.4964	12.801	12.1742	11.6063	11.0894	10.617	10.1834	9.78418	9.41533	9.07353	8.75591	8.45999	8.18361	7.92491	7.68224	7.45416	7.23938	7.03679	6.84536	6.6642	6.49251	6.32956	6.17471	6.02736
							9	875.984	186.425	104.521	72.6345	55.6657	45.1306	37.9532	32.749	28.8027	25.7073	23.2144	21.1637	19.4471	17.9891	16.7355	15.6459	14.6903	13.8453	13.0927	12.4183	11.8104	11.2596	10.7583	10.3	9.87955	9.49234	9.1346	8.8031	8.49504	8.20803	7.93997	7.68906	7.4537	7.23249	7.02418	6.82768	6.64202	6.46632	6.2998	6.14176	5.99156	5.84865
							9.5	851.651	181.249	101.62	70.6192	54.1218	43.8794	36.9014	31.8418	28.0051	24.9957	22.572	20.5783	18.9094	17.492	16.2731	15.2138	14.2847	13.4632	12.7316	12.0759	11.4848	10.9494	10.462	10.0165	9.60767	9.23122	8.88342	8.56112	8.26162	7.98258	7.72198	7.47804	7.24921	7.03414	6.83162	6.64058	6.46008	6.28926	6.12736	5.97371	5.82769	5.68875
							10	829.751	176.59	99.0088	68.8055	52.7323	42.7533	35.9548	31.0253	27.2872	24.3552	21.9939	20.0515	18.4255	17.0445	15.857	14.825	13.9198	13.1194	12.4065	11.7677	11.1919	10.6702	10.1953	9.76126	9.36297	8.9962	8.65734	8.34334	8.05154	7.77968	7.52577	7.28811	7.06517	6.85563	6.65832	6.47219	6.29633	6.1299	5.97217	5.82247	5.68021	5.54484
							10.5	809.936	172.374	96.6463	67.1644	51.4751	41.7344	35.0983	30.2865	26.6377	23.7758	21.4708	19.5748	17.9877	16.6396	15.4805	14.4731	13.5895	12.8082	12.1125	11.4889	10.9268	10.4176	9.95404	9.53035	9.14157	8.78356	8.4528	8.14629	7.86146	7.59609	7.34825	7.11626	6.89865	6.69411	6.50151	6.31983	6.14817	5.98572	5.83176	5.68563	5.54677	5.41463
							11	791.921	168.542	94.4986	65.6724	50.3322	40.8081	34.3196	29.6149	26.0473	23.249	20.9953	19.1414	17.5896	16.2716	15.1382	14.1532	13.2893	12.5254	11.8451	11.2354	10.6858	10.1879	9.73469	9.32043	8.9403	8.59025	8.26684	7.96715	7.68866	7.42919	7.18686	6.96003	6.74726	6.54728	6.35896	6.18132	6.01348	5.85464	5.7041	5.56123	5.42545	5.29625
							11.5	775.473	165.043	92.5376	64.3102	49.2886	39.9624	33.6087	29.0017	25.5081	22.7679	20.5611	18.7457	17.2262	15.9355	14.8257	13.8612	13.0152	12.2671	11.601	11.0039	10.4658	9.9782	9.53441	9.12875	8.75652	8.41374	8.09705	7.80358	7.53088	7.2768	7.03951	6.81739	6.60904	6.41321	6.2288	6.05485	5.8905	5.73496	5.58755	5.44764	5.31468	5.18817
							12	760.395	161.835	90.7399	63.0614	48.3319	39.1871	32.9569	28.4395	25.0139	22.327	20.1631	18.383	16.893	15.6274	14.5392	13.5934	12.7639	12.0304	11.3772	10.7917	10.2641	9.78597	9.35081	8.95304	8.58805	8.25193	7.94141	7.65365	7.38624	7.13711	6.90443	6.68663	6.48233	6.2903	6.10949	5.93892	5.77776	5.62525	5.4807	5.34352	5.21314	5.08909
							12.5	746.524	158.884	89.086	61.9126	47.4518	38.4738	32.3573	27.9223	24.5592	21.9214	19.7969	18.0493	16.5865	15.344	14.2756	13.3471	12.5327	11.8126	11.1713	10.5965	10.0785	9.60912	9.1819	8.79139	8.43305	8.10307	7.79821	7.5157	7.25318	7.00858	6.78015	6.56633	6.36575	6.17723	5.99972	5.83226	5.67404	5.52431	5.3824	5.24772	5.11973	4.99793
							13	733.718	156.16	87.5593	60.852	46.6394	37.8154	31.8038	27.4449	24.1395	21.5469	19.4589	17.7413	16.3035	15.0824	14.0323	13.1197	12.3193	11.6116	10.9813	10.4164	9.90718	9.44587	9.02598	8.64217	8.28998	7.96566	7.66603	7.38836	7.13034	6.88995	6.66543	6.45528	6.25814	6.07286	5.89838	5.7338	5.5783	5.43113	5.29166	5.15929	5.03349	4.91379
							13.5	721.862	153.638	86.1457	59.87	45.8871	37.2057	31.2913	27.0028	23.7509	21.2001	19.1459	17.456	16.0415	14.8401	13.807	12.9092	12.1217	11.4254	10.8053	10.2495	9.74856	9.29471	8.8816	8.504	8.1575	7.83842	7.54363	7.27046	7.0166	6.7801	6.55921	6.35245	6.1585	5.97621	5.80456	5.64264	5.48964	5.34486	5.20764	5.07741	4.95364	4.83588
							14	710.851	151.296	84.833	58.9582	45.1885	36.6396	30.8154	26.5924	23.39	20.8782	18.8553	17.1912	15.7982	14.6152	13.5978	12.7137	11.9382	11.2525	10.6419	10.0946	9.60127	9.15434	8.74754	8.37569	8.03448	7.72027	7.42998	7.16097	6.91099	6.67809	6.46057	6.25697	6.06598	5.88647	5.71743	5.55798	5.40732	5.26475	5.12962	5.00137	4.8795	4.76353
							14.5	700.6	149.115	83.6108	58.1092	44.5381	36.1125	30.3723	26.2102	23.054	20.5784	18.5847	16.9446	15.5717	14.4057	13.4031	12.5317	11.7674	11.0916	10.4897	9.95033	9.46414	9.02365	8.62272	8.25623	7.91994	7.61027	7.32416	7.05903	6.81266	6.58311	6.36874	6.16807	5.97983	5.80291	5.63631	5.47916	5.33068	5.19016	5.05698	4.93058	4.81046	4.69617
							15	691.032	147.08	82.4701	57.3168	43.9311	35.6205	29.9587	25.8534	22.7404	20.2986	18.3321	16.7144	15.3603	14.2102	13.2213	12.3618	11.6079	10.9414	10.3477	9.8157	9.33615	8.90168	8.50622	8.14474	7.81304	7.50759	7.22539	6.96389	6.72088	6.49447	6.28302	6.08509	5.89943	5.72492	5.5606	5.4056	5.25914	5.12054	4.98918	4.86451	4.74603	4.63329
							15.5	682.082	145.175	81.4029	56.5755	43.3632	35.1603	29.5718	25.5197	22.447	20.0368	18.0958	16.4991	15.1625	14.0273	13.0512	12.2029	11.4588	10.8008	10.2149	9.68974	9.21641	8.78757	8.39723	8.04043	7.71303	7.41154	7.133	6.87488	6.63502	6.41154	6.20283	6.00747	5.82421	5.65197	5.48977	5.33678	5.19221	5.05541	4.92575	4.8027	4.68575	4.57448
							16	673.69	143.39	80.4025	55.8805	42.8307	34.7288	29.2091	25.2069	22.1719	19.7914	17.8743	16.2972	14.9771	13.8559	12.8917	12.0538	11.3189	10.6691	10.0903	9.57166	9.10415	8.68058	8.29505	7.94264	7.61927	7.32149	7.04637	6.79143	6.55452	6.3338	6.12765	5.93469	5.75369	5.58357	5.42337	5.27225	5.12947	4.99435	4.86629	4.74475	4.62924	4.51934
							16.5	665.807	141.713	79.4626	55.2276	42.3306	34.3234	28.8684	24.913	21.9136	19.5609	17.6662	16.1076	14.8029	13.6948	12.742	11.9139	11.1875	10.5453	9.97334	9.46074	8.99869	8.58009	8.19906	7.85078	7.5312	7.2369	6.965	6.71304	6.4789	6.26076	6.05703	5.86633	5.68744	5.51931	5.36099	5.21164	5.07053	4.93699	4.81043	4.69031	4.57616	4.46754
							17	658.387	140.135	78.578	54.6131	41.8598	33.9419	28.5477	24.6363	21.6704	19.3439	17.4704	15.9291	14.639	13.5432	12.601	11.7821	11.0639	10.4288	9.86323	9.35633	8.89944	8.4855	8.10872	7.76432	7.4483	7.15728	6.88841	6.63926	6.40773	6.19202	5.99056	5.80199	5.62509	5.45884	5.30228	5.1546	5.01506	4.883	4.75785	4.63907	4.52619	4.41878
							17.5	651.392	138.647	77.744	54.0337	41.416	33.5822	28.2453	24.3755	21.4411	19.1394	17.2857	15.7608	14.4844	13.4003	12.4681	11.6579	10.9473	10.319	9.7594	9.25789	8.80585	8.39631	8.02354	7.6828	7.37013	7.08221	6.8162	6.5697	6.34063	6.12721	5.92789	5.74132	5.56631	5.40181	5.24692	5.10081	4.96275	4.8321	4.70828	4.59076	4.47908	4.37281
							18	644.785	137.241	76.9562	53.4865	40.9968	33.2425	27.9597	24.1292	21.2245	18.9461	17.1113	15.6019	14.3384	13.2653	12.3425	11.5406	10.8372	10.2152	9.66134	9.16492	8.71747	8.31208	7.94309	7.60581	7.29631	7.01131	6.748	6.50399	6.27725	6.066	5.8687	5.68402	5.51078	5.34796	5.19464	5.05001	4.91335	4.78403	4.66146	4.54514	4.43459	4.3294
							18.5	638.534	135.911	76.2111	52.9689	40.6002	32.9211	27.6895	23.8962	21.0196	18.7634	16.9463	15.4515	14.2003	13.1376	12.2238	11.4296	10.733	10.1171	9.56858	9.07697	8.63386	8.2324	7.86699	7.53297	7.22648	6.94424	6.68348	6.44184	6.2173	6.00809	5.81271	5.62982	5.45826	5.29702	5.14518	5.00195	4.86662	4.73855	4.61717	4.50198	4.3925	4.28833
							19	632.613	134.652	75.5051	52.4785	40.2245	32.6166	27.4336	23.6754	20.8255	18.5902	16.79	15.3091	14.0695	13.0166	12.1113	11.3245	10.6344	10.0241	9.4807	8.99365	8.55465	8.15691	7.79489	7.46397	7.16032	6.8807	6.62236	6.38296	6.1605	5.95323	5.75966	5.57847	5.4085	5.24875	5.09832	4.95642	4.82235	4.69547	4.57522	4.46109	4.35263	4.24942
							19.5	626.995	133.457	74.8353	52.0132	39.8681	32.3278	27.1907	23.466	20.6414	18.4259	16.6417	15.1739	13.9453	12.9018	12.0045	11.2247	10.5407	9.93593	9.39732	8.9146	8.47949	8.08529	7.72648	7.39851	7.09755	6.82041	6.56437	6.3271	6.10661	5.90119	5.70933	5.52975	5.36129	5.20296	5.05387	4.91323	4.78035	4.65459	4.53541	4.42229	4.3148	4.21251
							20	621.658	132.321	74.199	51.5712	39.5295	32.0534	26.9601	23.267	20.4665	18.2699	16.5008	15.0456	13.8274	12.7928	11.9031	11.13	10.4518	9.85214	9.31812	8.8395	8.4081	8.01725	7.6615	7.33632	7.03792	6.76314	6.50928	6.27403	6.05542	5.85174	5.66152	5.48347	5.31645	5.15946	5.01164	4.8722	4.74044	4.61576	4.49759	4.38544	4.27886	4.20423
							20.5	616.582	131.241	73.5938	51.1508	39.2074	31.7923	26.7406	23.0777	20.3001	18.1214	16.3668	14.9234	13.7152	12.6891	11.8067	11.0398	10.3672	9.77243	9.24277	8.76807	8.34019	7.95253	7.59969	7.27716	6.9812	6.70867	6.45687	6.22355	6.00672	5.80471	5.61604	5.43944	5.27378	5.11808	4.97147	4.83317	4.70249	4.57882	4.46162	4.35038	4.27308	4.26875
							21	611.747	130.213	73.0173	50.7503	38.9006	31.5437	26.5316	22.8974	20.1416	17.98	16.2392	14.8071	13.6084	12.5903	11.7148	10.954	10.2866	9.69652	9.17101	8.70003	8.27551	7.89089	7.54081	7.22082	6.92718	6.65678	6.40697	6.17547	5.96034	5.75992	5.57273	5.39751	5.23315	5.07867	4.93321	4.79599	4.66634	4.54364	4.42736	4.34216	4.33761	4.33308
							21.5	607.137	129.232	72.4677	50.3685	38.6081	31.3067	26.3324	22.7256	19.9905	17.8452	16.1175	14.6962	13.5065	12.4961	11.6272	10.8721	10.2098	9.62414	9.10259	8.63516	8.21384	7.83212	7.48468	7.16709	6.87567	6.60731	6.35938	6.12962	5.91612	5.7172	5.53143	5.35753	5.19441	5.0411	4.89673	4.76054	4.63187	4.5101	4.41149	4.40672	4.40196	4.39722
							22	602.736	128.296	71.943	50.0041	38.3289	31.0804	26.1421	22.5615	19.8462	17.7165	16.0013	14.5904	13.4093	12.4062	11.5436	10.794	10.1364	9.55505	9.03728	8.57324	8.15497	7.77602	7.4311	7.11581	6.8265	6.56009	6.31395	6.08586	5.87391	5.67643	5.492	5.31937	5.15743	5.00523	4.86191	4.72671	4.59897	4.48108	4.47608	4.4711	4.46613	4.46118
							22.5	598.531	127.401	71.4416	49.6558	38.0621	30.8642	25.9604	22.4047	19.7084	17.5935	15.8903	14.4892	13.3164	12.3203	11.4637	10.7193	10.0664	9.48902	8.97487	8.51406	8.09871	7.72241	7.37989	7.06681	6.77952	6.51496	6.27054	6.04405	5.83357	5.63747	5.45433	5.2829	5.12209	4.97095	4.82863	4.69438	4.56753	4.54571	4.5405	4.5353	4.53012	4.52496
							23	594.508	126.546	70.9621	49.3226	37.8069	30.6573	25.7865	22.2547	19.5766	17.4759	15.7841	14.3924	13.2275	12.2381	11.3873	10.6479	9.99932	9.42587	8.91517	8.45746	8.0449	7.67113	7.33092	7.01994	6.73458	6.4718	6.22902	6.00405	5.79499	5.60021	5.4183	5.24802	5.08829	4.93817	4.7968	4.66345	4.61564	4.61018	4.60475	4.59933	4.59393	4.58855
							23.5	590.657	125.726	70.5029	49.0037	37.5626	30.4593	25.62	22.1111	19.4503	17.3633	15.6825	14.2998	13.1424	12.1594	11.3141	10.5795	9.93514	9.3654	8.85801	8.40327	7.99338	7.62203	7.28402	6.97506	6.69155	6.43047	6.18927	5.96575	5.75804	5.56453	5.3838	5.21462	5.05593	4.90678	4.76633	4.68587	4.68017	4.67449	4.66883	4.66319	4.65756	4.65196
							24	586.966	124.941	70.0628	48.698	37.3284	30.2695	25.4605	21.9735	19.3294	17.2553	15.585	14.211	13.0608	12.084	11.244	10.5139	9.87363	9.30745	8.80323	8.35133	7.94401	7.57498	7.23908	6.93205	6.65031	6.39086	6.15117	5.92905	5.72264	5.53033	5.35073	5.18261	5.02491	4.87669	4.75642	4.75047	4.74454	4.73862	4.73273	4.72687	4.72102	4.71519
							24.5	583.426	124.188	69.6407	48.4048	37.1038	30.0875	25.3075	21.8415	19.2133	17.1518	15.4916	14.1258	12.9826	12.0116	11.1767	10.4511	9.81463	9.25187	8.75069	8.30152	7.89665	7.52985	7.19597	6.89079	6.61075	6.35287	6.11462	5.89385	5.68868	5.49754	5.31902	5.15191	4.99516	4.84784	4.8211	4.81491	4.80874	4.8026	4.79647	4.79037	4.7843	4.77824
							25	580.027	123.465	69.2355	48.1233	36.8881	29.9127	25.1606	21.7148	19.1019	17.0524	15.4019	14.0441	12.9075	11.9422	11.1121	10.3907	9.75799	9.1985	8.70025	8.25369	7.85119	7.48652	7.15459	6.85119	6.57278	6.3164	6.07954	5.86005	5.65608	5.46605	5.28857	5.12244	4.9666	4.89208	4.88562	4.87919	4.87279	4.8664	4.86004	4.85371	4.8474	4.84111
							25.5	576.761	122.77	68.8462	47.8528	36.6809	29.7448	25.0194	21.5931	18.9949	16.9569	15.3157	13.9655	12.8354	11.8755	11.0501	10.3327	9.70357	9.14724	8.65178	8.20774	7.8075	7.44489	7.11483	6.81313	6.5363	6.28136	6.04583	5.82758	5.62476	5.43579	5.25931	5.09412	4.96343	4.9567	4.95	4.94332	4.93667	4.93005	4.92345	4.91687	4.91032	4.9038
							26	573.621	122.102	68.4718	47.5928	36.4817	29.5834	24.8837	21.476	18.892	16.8651	15.2328	13.89	12.766	11.8113	10.9904	10.277	9.65124	9.09794	8.60518	8.16356	7.7655	7.40486	7.0766	6.77655	6.50121	6.24767	6.01342	5.79635	5.59464	5.40671	5.23119	5.06689	5.02815	5.02117	5.01422	5.00729	5.0004	4.99353	4.98668	4.97986	4.97307	4.96631
							26.5	570.6	121.459	68.1116	47.3426	36.29	29.428	24.7531	21.3634	18.7929	16.7767	15.153	13.8173	12.6992	11.7496	10.933	10.2233	9.60089	9.0505	8.56034	8.12104	7.72508	7.36634	7.03981	6.74134	6.46745	6.21525	5.98223	5.76631	5.56566	5.37871	5.20412	5.09999	5.09273	5.08549	5.07829	5.07111	5.06396	5.05684	5.04975	5.04269	5.03565	5.02864
							27	567.69	120.84	67.7647	47.1016	36.1054	29.2784	24.6273	21.2549	18.6975	16.6917	15.0762	13.7473	12.6349	11.6901	10.8777	10.1717	9.5524	9.00482	8.51716	8.0801	7.68616	7.32925	7.00438	6.70743	6.43495	6.18402	5.9522	5.73738	5.53775	5.35176	5.17805	5.16469	5.15717	5.14967	5.14221	5.13477	5.12737	5.12	5.11265	5.10534	5.09805	5.0908
							27.5	564.886	120.244	67.4304	46.8694	35.9275	29.1342	24.5061	21.1504	18.6056	16.6097	15.0022	13.6799	12.573	11.6329	10.8245	10.1219	9.50567	8.96079	8.47555	8.04065	7.64865	7.2935	6.97024	6.67476	6.40362	6.15394	5.92326	5.7095	5.51085	5.32578	5.23708	5.22925	5.22146	5.2137	5.20598	5.19828	5.19062	5.18299	5.17539	5.16782	5.16029	5.15278
							28	562.183	119.669	67.108	46.6454	35.756	28.9952	24.3893	21.0495	18.517	16.5306	14.9308	13.6148	12.5132	11.5776	10.7731	10.0739	9.46061	8.91834	8.43542	8.0026	7.61248	7.25903	6.93732	6.64325	6.37341	6.12492	5.89535	5.68261	5.48492	5.3099	5.30177	5.29367	5.28562	5.27759	5.2696	5.26164	5.25372	5.24582	5.23797	5.23014	5.22235	5.21459
							28.5	559.574	119.114	66.797	46.4294	35.5904	28.861	24.2765	20.9523	18.4315	16.4543	14.862	13.5521	12.4556	11.5243	10.7235	10.0276	9.41714	8.87738	8.3967	7.96589	7.57758	7.22577	6.90555	6.61285	6.34426	6.09693	5.86842	5.65667	5.45989	5.37473	5.36633	5.35796	5.34963	5.34133	5.33307	5.32484	5.31665	5.3085	5.30037	5.29229	5.28423	5.27622
							29	557.055	118.578	66.4967	46.2207	35.4306	28.7315	24.1676	20.8584	18.3489	16.3806	14.7955	13.4915	12.3999	11.4728	10.6756	9.98283	9.37516	8.83783	8.35931	7.93045	7.54388	7.19366	6.87488	6.5835	6.31612	6.0699	5.84242	5.63162	5.44817	5.43944	5.43076	5.42211	5.4135	5.40493	5.39639	5.38789	5.37943	5.37101	5.36262	5.35427	5.34595	5.33767
							29.5	554.621	118.06	66.2065	46.0192	35.2762	28.6064	24.0624	20.7676	18.2692	16.3095	14.7312	13.4329	12.3462	11.4231	10.6294	9.93962	9.3346	8.79962	8.3232	7.8962	7.51133	7.16263	6.84525	6.55514	6.28893	6.04378	5.8173	5.60742	5.51303	5.50402	5.49505	5.48612	5.47723	5.46838	5.45957	5.45079	5.44206	5.43336	5.4247	5.41608	5.4075	5.39896
							30	552.268	117.56	65.926	45.8243	35.1269	28.4854	23.9607	20.6799	18.1921	16.2407	14.6691	13.3763	12.2942	11.3751	10.5847	9.89785	9.29539	8.76269	8.28828	7.8631	7.47986	7.13264	6.81661	6.52772	6.26264	6.01854	5.79301	5.58712	5.57778	5.56848	5.55922	5.55	5.54082	5.53169	5.5226	5.51354	5.50453	5.49556	5.48663	5.47773	5.46888	5.46007
							Config 3
							Row Labels	0.00144	0.006769	0.012078	0.017387	0.022696	0.028005	0.033314	0.038623	0.043932	0.049241	0.05455	0.059859	0.065168	0.070477	0.075786	0.081095	0.086404	0.091713	0.097022	0.102331	0.10764	0.112949	0.118258	0.123567	0.128876	0.134185	0.139494	0.144803	0.150112	0.155421	0.16073	0.166039	0.171348	0.176657	0.181966	0.187275	0.192584	0.197893	0.203202	0.208511	0.21382	0.219129
							1	99999	99999	99999	99999	99999	99999	99999	99999	99999	99999	99999	99999	99999	99999	99999	99999	99999	99999	99999	99999	99999	99999	99999	99999	99999	99999	99999	99999	99999	99999	99999	99999	99999	99999	99999	99999	99999	99999	99999	99999	99999	99999
							1.5	99999	99999	99999	99999	99999	99999	99999	99999	99999	99999	99999	99999	99999	99999	99999	99999	99999	99999	99999	99999	99999	99999	99999	99999	99999	99999	99999	99999	99999	99999	99999	99999	99999	99999	99999	99999	99999	99999	99999	99999	99999	99999
							2	99999	99999	99999	99999	99999	99999	99999	99999	99999	99999	99999	99999	99999	99999	99999	99999	99999	99999	99999	99999	99999	99999	99999	99999	99999	99999	99999	99999	99999	99999	99999	99999	99999	99999	99999	99999	99999	99999	99999	99999	99999	99999
							2.5	99999	99999	99999	99999	99999	99999	99999	99999	99999	99999	99999	99999	99999	99999	99999	99999	99999	99999	99999	99999	99999	99999	99999	99999	99999	99999	99999	99999	99999	99999	99999	99999	99999	99999	99999	99999	99999	99999	99999	99999	99999	99999
							3	99999	99999	99999	99999	99999	99999	99999	99999	99999	99999	99999	99999	99999	99999	99999	99999	99999	99999	99999	99999	99999	99999	99999	99999	99999	99999	99999	99999	99999	99999	99999	99999	99999	99999	99999	99999	99999	99999	99999	99999	99999	99999
							3.5	99999	99999	99999	99999	99999	99999	99999	99999	99999	99999	99999	99999	99999	99999	99999	99999	99999	99999	99999	99999	99999	99999	99999	99999	99999	99999	99999	99999	99999	99999	99999	99999	99999	99999	99999	99999	99999	99999	99999	99999	99999	99999
							4	99999	99999	99999	99999	99999	99999	99999	99999	99999	99999	99999	99999	99999	99999	99999	99999	99999	99999	99999	99999	99999	99999	99999	99999	99999	99999	99999	99999	99999	99999	99999	99999	99999	99999	99999	99999	99999	99999	99999	99999	99999	99999
							4.5	99999	99999	99999	99999	99999	99999	99999	99999	99999	99999	99999	99999	99999	99999	99999	99999	99999	99999	99999	99999	99999	99999	99999	99999	99999	99999	99999	99999	99999	99999	99999	99999	99999	99999	99999	99999	99999	99999	99999	99999	99999	99999
							5	99999	99999	99999	99999	99999	99999	99999	99999	99999	99999	99999	99999	99999	99999	99999	99999	99999	99999	99999	99999	99999	99999	99999	99999	99999	99999	99999	99999	99999	99999	99999	99999	99999	99999	99999	99999	99999	99999	99999	99999	99999	99999
							5.5	99999	99999	99999	99999	99999	99999	99999	99999	99999	99999	99999	99999	99999	99999	99999	99999	99999	99999	99999	99999	99999	99999	99999	99999	99999	99999	99999	99999	99999	99999	99999	99999	99999	99999	99999	99999	99999	99999	99999	99999	99999	99999
							6	99999	99999	99999	99999	99999	99999	99999	99999	99999	99999	99999	99999	99999	99999	99999	99999	99999	99999	99999	99999	99999	99999	99999	99999	99999	99999	99999	99999	99999	99999	99999	99999	99999	99999	99999	99999	99999	99999	99999	99999	99999	99999
							6.5	99999	99999	99999	99999	99999	99999	99999	99999	99999	99999	99999	99999	99999	99999	99999	99999	99999	99999	99999	99999	99999	99999	99999	99999	99999	99999	99999	99999	99999	99999	99999	99999	99999	99999	99999	99999	99999	99999	99999	99999	99999	99999
							7	99999	99999	99999	99999	99999	99999	99999	99999	99999	99999	99999	99999	99999	99999	99999	99999	99999	99999	99999	99999	99999	99999	99999	99999	99999	99999	99999	99999	99999	99999	99999	99999	99999	99999	99999	99999	99999	99999	99999	99999	99999	99999
							7.5	99999	99999	99999	99999	99999	99999	99999	99999	99999	99999	99999	99999	99999	99999	99999	99999	99999	99999	99999	99999	99999	99999	99999	99999	99999	99999	99999	99999	99999	99999	99999	99999	99999	99999	99999	99999	99999	99999	99999	99999	99999	99999
							8	99999	99999	99999	99999	99999	99999	99999	99999	99999	99999	99999	99999	99999	99999	99999	99999	99999	99999	99999	99999	99999	99999	99999	99999	99999	99999	99999	99999	99999	99999	99999	99999	99999	99999	99999	99999	99999	99999	99999	99999	99999	99999
							8.5	99999	99999	99999	99999	99999	99999	99999	99999	99999	99999	99999	99999	99999	99999	99999	99999	99999	99999	99999	99999	99999	99999	99999	99999	99999	99999	99999	99999	99999	99999	99999	99999	99999	99999	99999	99999	99999	99999	99999	99999	99999	99999
							9	99999	99999	99999	99999	99999	99999	99999	99999	99999	99999	99999	99999	99999	99999	99999	99999	99999	99999	99999	99999	99999	99999	99999	99999	99999	99999	99999	99999	99999	99999	99999	99999	99999	99999	99999	99999	99999	99999	99999	99999	99999	99999
							9.5	99999	99999	99999	99999	99999	99999	99999	99999	99999	99999	99999	99999	99999	99999	99999	99999	99999	99999	99999	99999	99999	99999	99999	99999	99999	99999	99999	99999	99999	99999	99999	99999	99999	99999	99999	99999	99999	99999	99999	99999	99999	99999
							10	99999	99999	99999	99999	99999	99999	99999	99999	99999	99999	99999	99999	99999	99999	99999	99999	99999	99999	99999	99999	99999	99999	99999	99999	99999	99999	99999	99999	99999	99999	99999	99999	99999	99999	99999	99999	99999	99999	99999	99999	99999	99999
							10.5	99999	99999	99999	99999	99999	99999	99999	99999	99999	99999	99999	99999	99999	99999	99999	99999	99999	99999	99999	99999	99999	99999	99999	99999	99999	99999	99999	99999	99999	99999	99999	99999	99999	99999	99999	99999	99999	99999	99999	99999	99999	99999
							11	99999	99999	99999	99999	99999	99999	99999	99999	99999	99999	99999	99999	99999	99999	99999	99999	99999	99999	99999	99999	99999	99999	99999	99999	99999	99999	99999	99999	99999	99999	99999	99999	99999	99999	99999	99999	99999	99999	99999	99999	99999	99999
							11.5	99999	99999	99999	99999	99999	99999	99999	99999	99999	99999	99999	99999	99999	99999	99999	99999	99999	99999	99999	99999	99999	99999	99999	99999	99999	99999	99999	99999	99999	99999	99999	99999	99999	99999	99999	99999	99999	99999	99999	99999	99999	99999
							12	99999	99999	99999	99999	99999	99999	99999	99999	99999	99999	99999	99999	99999	99999	99999	99999	99999	99999	99999	99999	99999	99999	99999	99999	99999	99999	99999	99999	99999	99999	99999	99999	99999	99999	99999	99999	99999	99999	99999	99999	99999	99999
							12.5	99999	99999	99999	99999	99999	99999	99999	99999	99999	99999	99999	99999	99999	99999	99999	99999	99999	99999	99999	99999	99999	99999	99999	99999	99999	99999	99999	99999	99999	99999	99999	99999	99999	99999	99999	99999	99999	99999	99999	99999	99999	99999
							13	99999	99999	99999	99999	99999	99999	99999	99999	99999	99999	99999	99999	99999	99999	99999	99999	99999	99999	99999	99999	99999	99999	99999	99999	99999	99999	99999	99999	99999	99999	99999	99999	99999	99999	99999	99999	99999	99999	99999	99999	99999	99999
							13.5	99999	99999	99999	99999	99999	99999	99999	99999	99999	99999	99999	99999	99999	99999	99999	99999	99999	99999	99999	99999	99999	99999	99999	99999	99999	99999	99999	99999	99999	99999	99999	99999	99999	99999	99999	99999	99999	99999	99999	99999	99999	99999
							14	99999	99999	99999	99999	99999	99999	99999	99999	99999	99999	99999	99999	99999	99999	99999	99999	99999	99999	99999	99999	99999	99999	99999	99999	99999	99999	99999	99999	99999	99999	99999	99999	99999	99999	99999	99999	99999	99999	99999	99999	99999	99999
							14.5	99999	99999	99999	99999	99999	99999	99999	99999	99999	99999	99999	99999	99999	99999	99999	99999	99999	99999	99999	99999	99999	99999	99999	99999	99999	99999	99999	99999	99999	99999	99999	99999	99999	99999	99999	99999	99999	99999	99999	99999	99999	99999
							15	99999	99999	99999	99999	99999	99999	99999	99999	99999	99999	99999	99999	99999	99999	99999	99999	99999	99999	99999	99999	99999	99999	99999	99999	99999	99999	99999	99999	99999	99999	99999	99999	99999	99999	99999	99999	99999	99999	99999	99999	99999	99999
							15.5	99999	99999	99999	99999	99999	99999	99999	99999	99999	99999	99999	99999	99999	99999	99999	99999	99999	99999	99999	99999	99999	99999	99999	99999	99999	99999	99999	99999	99999	99999	99999	99999	99999	99999	99999	99999	99999	99999	99999	99999	99999	99999
							16	99999	99999	99999	99999	99999	99999	99999	99999	99999	99999	99999	99999	99999	99999	99999	99999	99999	99999	99999	99999	99999	99999	99999	99999	99999	99999	99999	99999	99999	99999	99999	99999	99999	99999	99999	99999	99999	99999	99999	99999	99999	99999
							16.5	99999	99999	99999	99999	99999	99999	99999	99999	99999	99999	99999	99999	99999	99999	99999	99999	99999	99999	99999	99999	99999	99999	99999	99999	99999	99999	99999	99999	99999	99999	99999	99999	99999	99999	99999	99999	99999	99999	99999	99999	99999	99999
							17	99999	99999	99999	99999	99999	99999	99999	99999	99999	99999	99999	99999	99999	99999	99999	99999	99999	99999	99999	99999	99999	99999	99999	99999	99999	99999	99999	99999	99999	99999	99999	99999	99999	99999	99999	99999	99999	99999	99999	99999	99999	99999
							17.5	99999	99999	99999	99999	99999	99999	99999	99999	99999	99999	99999	99999	99999	99999	99999	99999	99999	99999	99999	99999	99999	99999	99999	99999	99999	99999	99999	99999	99999	99999	99999	99999	99999	99999	99999	99999	99999	99999	99999	99999	99999	99999
							18	99999	99999	99999	99999	99999	99999	99999	99999	99999	99999	99999	99999	99999	99999	99999	99999	99999	99999	99999	99999	99999	99999	99999	99999	99999	99999	99999	99999	99999	99999	99999	99999	99999	99999	99999	99999	99999	99999	99999	99999	99999	99999
							18.5	99999	99999	99999	99999	99999	99999	99999	99999	99999	99999	99999	99999	99999	99999	99999	99999	99999	99999	99999	99999	99999	99999	99999	99999	99999	99999	99999	99999	99999	99999	99999	99999	99999	99999	99999	99999	99999	99999	99999	99999	99999	99999
							19	99999	99999	99999	99999	99999	99999	99999	99999	99999	99999	99999	99999	99999	99999	99999	99999	99999	99999	99999	99999	99999	99999	99999	99999	99999	99999	99999	99999	99999	99999	99999	99999	99999	99999	99999	99999	99999	99999	99999	99999	99999	99999
							19.5	99999	99999	99999	99999	99999	99999	99999	99999	99999	99999	99999	99999	99999	99999	99999	99999	99999	99999	99999	99999	99999	99999	99999	99999	99999	99999	99999	99999	99999	99999	99999	99999	99999	99999	99999	99999	99999	99999	99999	99999	99999	99999
							20	99999	99999	99999	99999	99999	99999	99999	99999	99999	99999	99999	99999	99999	99999	99999	99999	99999	99999	99999	99999	99999	99999	99999	99999	99999	99999	99999	99999	99999	99999	99999	99999	99999	99999	99999	99999	99999	99999	99999	99999	99999	532.847
							20.5	99999	99999	99999	99999	99999	99999	99999	99999	99999	99999	99999	99999	99999	99999	99999	99999	99999	99999	99999	99999	99999	99999	99999	99999	99999	99999	99999	99999	99999	99999	99999	99999	99999	99999	99999	99999	99999	99999	99999	99999	520.7	115.708
							21	99999	99999	99999	99999	99999	99999	99999	99999	99999	99999	99999	99999	99999	99999	99999	99999	99999	99999	99999	99999	99999	99999	99999	99999	99999	99999	99999	99999	99999	99999	99999	99999	99999	99999	99999	99999	99999	99999	99999	609.45	119.092	66.0111
							21.5	99999	99999	99999	99999	99999	99999	99999	99999	99999	99999	99999	99999	99999	99999	99999	99999	99999	99999	99999	99999	99999	99999	99999	99999	99999	99999	99999	99999	99999	99999	99999	99999	99999	99999	99999	99999	99999	99999	947.279	127.473	68.3533	46.7052
							22	99999	99999	99999	99999	99999	99999	99999	99999	99999	99999	99999	99999	99999	99999	99999	99999	99999	99999	99999	99999	99999	99999	99999	99999	99999	99999	99999	99999	99999	99999	99999	99999	99999	99999	99999	99999	99999	5506.59	142.799	72.3591	48.4661	36.4406
							22.5	99999	99999	99999	99999	99999	99999	99999	99999	99999	99999	99999	99999	99999	99999	99999	99999	99999	99999	99999	99999	99999	99999	99999	99999	99999	99999	99999	99999	99999	99999	99999	99999	99999	99999	99999	99999	99999	169.881	78.5255	51.0756	37.8519	30.071
							23	99999	99999	99999	99999	99999	99999	99999	99999	99999	99999	99999	99999	99999	99999	99999	99999	99999	99999	99999	99999	99999	99999	99999	99999	99999	99999	99999	99999	99999	99999	99999	99999	99999	99999	99999	99999	221.729	87.8076	54.756	39.7884	31.2511	25.733
							23.5	99999	99999	99999	99999	99999	99999	99999	99999	99999	99999	99999	99999	99999	99999	99999	99999	99999	99999	99999	99999	99999	99999	99999	99999	99999	99999	99999	99999	99999	99999	99999	99999	99999	99999	99999	346.401	102.095	59.8857	42.3765	32.7942	26.7492	22.5881
							24	99999	99999	99999	99999	99999	99999	99999	99999	99999	99999	99999	99999	99999	99999	99999	99999	99999	99999	99999	99999	99999	99999	99999	99999	99999	99999	99999	99999	99999	99999	99999	99999	99999	99999	971.55	125.535	67.1221	45.8163	34.7825	28.0351	23.4825	20.2037
							24.5	99999	99999	99999	99999	99999	99999	99999	99999	99999	99999	99999	99999	99999	99999	99999	99999	99999	99999	99999	99999	99999	99999	99999	99999	99999	99999	99999	99999	99999	99999	99999	99999	99999	99999	169.105	77.6778	50.4297	37.3396	29.6485	24.5873	21.0039	18.3336
							25	99999	99999	99999	99999	99999	99999	99999	99999	99999	99999	99999	99999	99999	99999	99999	99999	99999	99999	99999	99999	99999	99999	99999	99999	99999	99999	99999	99999	99999	99999	99999	99999	99999	274.096	94.0224	56.7575	40.6545	31.6738	25.9458	21.9744	19.0589	16.8277
							25.5	99999	99999	99999	99999	99999	99999	99999	99999	99999	99999	99999	99999	99999	99999	99999	99999	99999	99999	99999	99999	99999	99999	99999	99999	99999	99999	99999	99999	99999	99999	99999	99999	847	122.032	65.7718	45.0263	34.2349	27.6195	23.149	19.9259	17.4919	15.5889
							26	99999	99999	99999	99999	99999	99999	99999	99999	99999	99999	99999	99999	99999	99999	99999	99999	99999	99999	99999	99999	99999	99999	99999	99999	99999	99999	99999	99999	99999	99999	99999	99999	179.87	79.397	50.9531	37.52	29.696	24.5747	20.9619	18.2767	16.2025	14.552
							26.5	99999	99999	99999	99999	99999	99999	99999	99999	99999	99999	99999	99999	99999	99999	99999	99999	99999	99999	99999	99999	99999	99999	99999	99999	99999	99999	99999	99999	99999	99999	99999	365.008	102.038	59.3244	41.8267	32.3045	26.317	22.2041	19.2047	16.9204	15.1228	13.6713
							27	99999	99999	99999	99999	99999	99999	99999	99999	99999	99999	99999	99999	99999	99999	99999	99999	99999	99999	99999	99999	99999	99999	99999	99999	99999	99999	99999	99999	99999	99999	99999	146.445	71.8943	47.6516	35.6411	28.4699	23.7036	20.3062	17.762	15.7854	14.2056	12.914
							27.5	99999	99999	99999	99999	99999	99999	99999	99999	99999	99999	99999	99999	99999	99999	99999	99999	99999	99999	99999	99999	99999	99999	99999	99999	99999	99999	99999	99999	99999	99999	271.197	92.6588	55.8888	40.0183	31.1721	25.5318	21.622	18.7522	16.5562	14.8216	13.4168	12.2559
							28	99999	99999	99999	99999	99999	99999	99999	99999	99999	99999	99999	99999	99999	99999	99999	99999	99999	99999	99999	99999	99999	99999	99999	99999	99999	99999	99999	99999	99999	2602.37	133.107	68.3213	45.9641	34.6369	27.7922	23.2088	19.925	17.4566	15.5335	13.9929	12.7311	11.6786
							28.5	99999	99999	99999	99999	99999	99999	99999	99999	99999	99999	99999	99999	99999	99999	99999	99999	99999	99999	99999	99999	99999	99999	99999	99999	99999	99999	99999	99999	99999	245.235	89.089	54.445	39.208	30.6389	25.1465	21.326	18.5149	16.3598	14.655	13.2728	12.1296	11.1682
							29	99999	99999	99999	99999	99999	99999	99999	99999	99999	99999	99999	99999	99999	99999	99999	99999	99999	99999	99999	99999	99999	99999	99999	99999	99999	99999	99999	99999	2025.72	130.493	67.4389	45.4781	34.312	27.5516	23.0192	19.7691	17.3246	15.4192	13.8923	12.6413	11.5976	10.7136
							29.5	99999	99999	99999	99999	99999	99999	99999	99999	99999	99999	99999	99999	99999	99999	99999	99999	99999	99999	99999	99999	99999	99999	99999	99999	99999	99999	99999	99999	252.623	89.7219	54.5613	39.2068	30.6007	25.0957	21.2715	18.4602	16.3065	14.6038	13.2239	12.0829	11.1237	10.3062
							30	99999	99999	99999	99999	99999	99999	99999	99999	99999	99999	99999	99999	99999	99999	99999	99999	99999	99999	99999	99999	99999	99999	99999	99999	99999	99999	99999	8608.3	136.52	68.8277	46.0226	34.5743	27.6907	23.0954	19.8101	17.3444	15.4257	13.8901	12.6333	11.5857	10.699	9.9389
							Config 2
							Row Labels	0.00144	0.006769	0.012078	0.017387	0.022696	0.028005	0.033314	0.038623	0.043932	0.049241	0.05455	0.059859	0.065168	0.070477	0.075786	0.081095	0.086404	0.091713	0.097022	0.102331	0.10764	0.112949	0.118258	0.123567	0.128876	0.134185	0.139494	0.144803	0.150112	0.155421	0.16073	0.166039	0.171348	0.176657	0.181966	0.187275	0.192584	0.197893	0.203202	0.208511	0.21382	0.219129
							1	4585.16	975.496	546.749	379.832	291.004	235.855	198.284	171.041	150.383	134.179	121.13	110.395	101.409	93.7769	87.2142	81.5108	76.5082	72.0848	68.1455	64.6149	61.4326	58.5495	55.9252	53.5265	51.3253	49.2984	47.4257	45.6903	44.0777	42.5753	41.1721	39.8587	38.6266	37.4686	36.3782	35.3496	34.3777	33.4579	32.5862	31.7589	30.9727	30.2246
							1.5	3196.06	679.987	381.133	264.786	202.87	164.429	138.24	119.251	104.851	93.5566	84.4605	76.9779	70.7144	65.3946	60.8201	56.8446	53.3576	50.2743	47.5285	45.0675	42.8494	40.8397	39.0105	37.3385	35.8042	34.3913	33.086	31.8764	30.7523	29.7051	28.727	27.8115	26.9527	26.1455	25.3854	24.6684	23.991	23.3499	22.7423	22.1656	21.6176	21.0961
							2	2501.25	532.176	298.294	207.241	158.786	128.702	108.207	93.3457	82.0766	73.2375	66.1189	60.2631	55.3613	51.198	47.6181	44.5068	41.7779	39.365	37.2161	35.2901	33.5542	31.9814	30.5499	29.2414	28.0407	26.935	25.9134	24.9668	24.0871	23.2675	22.5021	21.7856	21.1135	20.4818	19.887	19.3259	18.7957	18.294	17.8185	17.3672	16.9383	16.5302
							2.5	2084.23	443.462	248.575	172.703	132.327	107.259	90.181	77.7979	68.4077	61.0423	55.1106	50.2311	46.1466	42.6774	39.6944	37.1019	34.8279	32.8173	31.0267	29.4219	27.9754	26.6648	25.472	24.3816	23.3811	22.4597	21.6085	20.8197	20.0867	19.4038	18.766	18.1689	17.6089	17.0825	16.5869	16.1193	15.6775	15.2595	14.8632	14.4872	14.1298	13.7898
							3	1806.15	384.303	215.421	149.672	114.683	92.96	78.1606	67.4298	59.2925	52.9099	47.7697	43.5413	40.0018	36.9955	34.4105	32.1639	30.1934	28.451	26.8993	25.5086	24.2551	23.1195	22.0858	21.1409	20.2739	19.4755	18.7378	18.0543	17.4191	16.8273	16.2745	15.7572	15.2719	14.8157	14.3862	13.981	13.5982	13.2359	12.8926	12.5667	12.257	11.9623
							3.5	1607.46	342.037	191.733	133.217	102.077	82.7439	69.5726	60.0223	52.7802	47.0997	42.525	38.7617	35.6115	32.936	30.6353	28.6359	26.8822	25.3315	23.9505	22.7128	21.5972	20.5865	19.6665	18.8256	18.0539	17.3433	16.6868	16.0785	15.5131	14.9864	14.4945	14.0341	13.6022	13.1962	12.8139	12.4533	12.1126	11.7902	11.4846	11.1946	10.919	10.6567
							4	1458.42	310.33	173.963	120.873	92.6208	75.0802	63.1302	54.4654	47.8948	42.7411	38.5905	35.1762	32.3182	29.8907	27.8034	25.9893	24.3982	22.9913	21.7384	20.6155	19.6033	18.6863	17.8516	17.0887	16.3886	15.7439	15.1482	14.5963	14.0834	13.6055	13.1592	12.7415	12.3496	11.9813	11.6345	11.3073	10.9982	10.7056	10.4284	10.1653	9.9152	9.67726
							4.5	1342.48	285.665	160.139	111.271	85.2644	69.1183	58.1184	50.1425	44.0944	39.3504	35.5298	32.3869	29.7561	27.5217	25.6003	23.9305	22.4659	21.1708	20.0175	18.9839	18.0522	17.2081	16.4398	15.7375	15.093	14.4996	13.9513	13.4433	12.9711	12.5313	12.1205	11.7359	11.3752	11.0362	10.7169	10.4158	10.1312	9.86195	9.60674	9.36453	9.13435	8.91532
							5	1249.7	265.929	149.078	103.587	79.3781	64.3479	54.1083	46.6836	41.0534	36.6373	33.0808	30.1551	27.7061	25.6261	23.8375	22.2831	20.9197	19.7142	18.6406	17.6783	16.8111	16.0253	15.3101	14.6563	14.0564	13.504	12.9936	12.5207	12.0812	11.6717	11.2893	10.9313	10.5955	10.2799	9.98275	9.70241	9.43753	9.18686	8.94929	8.72382	8.50955	8.30565
							5.5	1173.78	249.778	140.027	97.2993	74.5612	60.4442	50.8266	43.8531	38.565	34.4171	31.0767	28.3288	26.0286	24.0749	22.395	20.935	19.6545	18.5222	17.5138	16.61	15.7954	15.0574	14.3856	13.7716	13.2081	12.6893	12.2099	11.7657	11.3529	10.9683	10.6091	10.2729	9.95751	9.66108	9.38195	9.11865	8.86986	8.63442	8.41129	8.19951	7.99826	7.80675
							6	1110.51	236.317	132.483	92.0588	70.5465	57.1906	48.0915	41.4939	36.4909	32.5667	29.4063	26.8066	24.6304	22.782	21.1927	19.8114	18.5999	17.5286	16.5746	15.7196	14.9489	14.2507	13.6151	13.0342	12.5011	12.0102	11.5567	11.1364	10.7459	10.382	10.0422	9.72412	9.42574	9.14529	8.88121	8.6321	8.39673	8.17398	7.96287	7.76252	7.57211	7.39093
							6.5	1056.96	224.925	126.098	87.6237	67.1489	54.4371	45.7768	39.4974	34.7356	31.0007	27.9927	25.5183	23.4471	21.6879	20.1752	18.8605	17.7074	16.6878	15.7798	14.966	14.2325	13.5679	12.9631	12.4101	11.9028	11.4356	11.0039	10.6039	10.2322	9.88588	9.56245	9.2597	8.97571	8.70878	8.45744	8.22034	7.99632	7.78432	7.58339	7.3927	7.21147	7.03903
							7	1011.05	215.159	120.625	83.8217	64.2363	52.0766	43.7925	37.7858	33.2309	29.6582	26.7809	24.414	22.4327	20.7499	19.3029	18.0454	16.9424	15.9671	15.0985	14.32	13.6184	12.9827	12.4041	11.8752	11.3898	10.9429	10.53	10.1474	9.79182	9.46055	9.15116	8.86156	8.58991	8.33458	8.09415	7.86736	7.65306	7.45027	7.25807	7.07566	6.90231	6.73735
							7.5	971.258	206.694	115.881	80.5262	61.7116	50.0306	42.0725	36.3023	31.9266	28.4945	25.7305	23.4567	21.5534	19.9369	18.5469	17.3388	16.2792	15.3423	14.5079	13.7601	13.0861	12.4754	11.9195	11.4114	10.9452	10.5159	10.1192	9.75167	9.41011	9.09188	8.79467	8.51647	8.2555	8.01022	7.77926	7.56139	7.35553	7.16072	6.97609	6.80085	6.63433	6.47587
							8	936.436	199.286	111.729	77.6422	59.5023	48.24	40.5673	35.004	30.7852	27.4762	24.8113	22.619	20.784	19.2254	17.8852	16.7205	15.6989	14.7955	13.9911	13.2701	12.6202	12.0314	11.4955	11.0056	10.5561	10.1422	9.75977	9.40538	9.07606	8.76924	8.48269	8.21446	7.96286	7.72638	7.50369	7.29363	7.09516	6.90733	6.72932	6.56037	6.39981	6.24703
							8.5	905.707	192.749	108.066	75.0972	57.5526	46.6599	39.2391	33.8583	29.778	26.5776	24.0001	21.8798	20.105	18.5975	17.3013	16.1748	15.1867	14.3131	13.535	12.8377	12.2091	11.6396	11.1213	10.6475	10.2128	9.81243	9.44255	9.09979	8.78128	8.48453	8.20738	7.94796	7.70461	7.47589	7.26051	7.05735	6.86538	6.68372	6.51155	6.34815	6.19286	6.04509
							9	878.388	186.937	104.809	72.8347	55.8193	45.2553	38.0582	32.8398	28.8826	25.7787	23.2789	21.2226	19.5013	18.0394	16.7822	15.6897	14.7314	13.8841	13.1295	12.4532	11.8436	11.2914	10.7887	10.3292	9.90753	9.51926	9.16054	8.82812	8.51922	8.23142	7.96263	7.71103	7.47503	7.2532	7.04432	6.84729	6.66112	6.48493	6.31796	6.15948	6.00888	5.86557
							9.5	853.943	181.737	101.894	70.8101	54.2683	43.9983	37.0016	31.9283	28.0813	25.0638	22.6336	20.6345	18.9612	17.5399	16.3178	15.2556	14.324	13.5003	12.7667	12.1092	11.5166	10.9797	10.491	10.0443	9.63439	9.25692	8.90818	8.58502	8.28472	8.00493	7.74362	7.49902	7.26958	7.05394	6.85087	6.65932	6.47833	6.30705	6.14472	5.99066	5.84424	5.70493
							10	831.939	177.056	99.2707	68.9877	52.8722	42.8669	36.0505	31.108	27.36	24.4203	22.0528	20.1052	18.4749	17.0903	15.8997	14.8649	13.9573	13.1548	12.4401	11.7996	11.2222	10.6992	10.2231	9.78787	9.38853	9.02079	8.68104	8.3662	8.07364	7.80106	7.54649	7.30819	7.08467	6.87458	6.67674	6.49013	6.3138	6.14694	5.98879	5.8387	5.69606	5.56033
							10.5	812.029	172.82	96.8969	67.3387	51.609	41.8431	35.1898	30.3656	26.7074	23.838	21.5272	19.6262	18.035	16.6835	15.5214	14.5114	13.6255	12.8422	12.1446	11.5194	10.9559	10.4453	9.98062	9.55584	9.16606	8.80712	8.4755	8.1682	7.88264	7.61659	7.36811	7.13552	6.91734	6.71228	6.51918	6.33703	6.16493	6.00205	5.84769	5.70119	5.56197	5.42949
							11	793.927	168.97	94.7386	65.8395	50.4604	40.9123	34.4074	29.6907	26.1141	23.3087	21.0493	19.1907	17.635	16.3136	15.1774	14.1899	13.3238	12.558	11.8759	11.2647	10.7137	10.2145	9.7602	9.34489	8.96379	8.61286	8.28863	7.98818	7.70899	7.44886	7.20593	6.97852	6.76521	6.56472	6.37593	6.19784	6.02957	5.87033	5.71941	5.57618	5.44005	5.31053
							11.5	777.397	165.453	92.7679	64.4705	49.4117	40.0623	33.6929	29.0744	25.5723	22.8253	20.613	18.7931	17.2697	15.9759	14.8633	13.8964	13.0483	12.2984	11.6306	11.0321	10.4926	10.0038	9.55891	9.15225	8.7791	8.43547	8.118	7.8238	7.55042	7.29571	7.05783	6.83516	6.62629	6.42998	6.24512	6.07074	5.90597	5.75005	5.60227	5.46202	5.32873	5.2019
							12	762.243	162.229	90.9611	63.2155	48.4502	39.2831	33.0378	28.5095	25.0755	22.3821	20.2129	18.4285	16.9349	15.6663	14.5754	13.6273	12.7958	12.0605	11.4057	10.8188	10.2899	9.8106	9.37439	8.97566	8.60977	8.27284	7.96156	7.6731	7.40505	7.15531	6.92206	6.70374	6.49894	6.30645	6.12519	5.95421	5.79266	5.63978	5.49488	5.35736	5.22667	5.10232
							12.5	748.3	159.263	89.2988	62.0607	47.5655	38.5662	32.4351	27.9896	24.6185	21.9744	19.8449	18.0931	16.6268	15.3814	14.3104	13.3797	12.5634	11.8416	11.1987	10.6226	10.1033	9.63284	9.20461	8.81317	8.45398	8.12321	7.81763	7.53445	7.2713	7.02612	6.79715	6.58281	6.38176	6.1928	6.01485	5.847	5.6884	5.53832	5.39607	5.26107	5.13277	5.01069
							13	735.428	156.525	87.7642	60.9947	46.7489	37.9043	31.8788	27.5097	24.1966	21.5979	19.5051	17.7835	16.3424	15.1184	14.0659	13.1512	12.3489	11.6395	11.0077	10.4415	9.93113	9.46874	9.04787	8.66317	8.31016	7.98508	7.68475	7.40644	7.14782	6.90686	6.68183	6.47118	6.27359	6.08787	5.91299	5.74803	5.59216	5.44465	5.30486	5.17218	5.04609	4.9261
							13.5	723.509	153.989	86.3431	60.0075	45.9926	37.2914	31.3636	27.0653	23.8059	21.2494	19.1904	17.4967	16.079	14.8748	13.8394	12.9395	12.1502	11.4523	10.8308	10.2738	9.77167	9.31678	8.90273	8.52426	8.17698	7.85717	7.56171	7.28791	7.03348	6.79643	6.57504	6.36781	6.17342	5.99071	5.81867	5.65638	5.50303	5.35792	5.22039	5.08986	4.96581	4.84778
							14	712.44	151.635	85.0234	59.0908	45.2903	36.7223	30.8851	26.6526	23.4431	20.9257	18.8982	17.2305	15.8344	14.6487	13.6291	12.743	11.9658	11.2785	10.6665	10.118	9.62359	9.17566	8.76795	8.39527	8.0533	7.73838	7.44744	7.17783	6.92729	6.69387	6.47587	6.27181	6.08039	5.90048	5.73107	5.57126	5.42027	5.27737	5.14195	5.01341	4.89127	4.77504
							14.5	702.134	149.442	83.7946	58.2372	44.6364	36.1923	30.4396	26.2684	23.1053	20.6243	18.6262	16.9825	15.6067	14.4381	13.4332	12.56	11.794	11.1167	10.5135	9.97296	9.48571	9.04426	8.64245	8.27516	7.93814	7.62778	7.34105	7.07534	6.82843	6.59838	6.38353	6.18242	5.99378	5.81647	5.64951	5.49201	5.3432	5.20238	5.06891	4.94224	4.82185	4.70731
							15	692.514	147.395	82.6476	57.4404	44.026	35.6977	30.0238	25.9097	22.79	20.3429	18.3722	16.7511	15.3941	14.2415	13.2504	12.3891	11.6337	10.9657	10.3708	9.83759	9.35701	8.92161	8.5253	8.16305	7.83064	7.52454	7.24173	6.97967	6.73614	6.50925	6.29734	6.09899	5.91293	5.73805	5.57338	5.41804	5.27127	5.13237	5.00073	4.8758	4.75706	4.64409
							15.5	683.513	145.481	81.5746	56.695	43.455	35.2349	29.6347	25.5741	22.4949	20.0797	18.1346	16.5346	15.1952	14.0576	13.0794	12.2293	11.4837	10.8243	10.2372	9.71093	9.2366	8.80686	8.41571	8.05816	7.73008	7.42795	7.14882	6.89016	6.6498	6.42586	6.21671	6.02093	5.83729	5.66469	5.50215	5.34884	5.20397	5.06688	4.93695	4.81364	4.69645	4.58494
							16	675.075	143.686	80.5685	55.9961	42.9196	34.801	29.27	25.2595	22.2183	19.833	17.9119	16.3316	15.0087	13.8852	12.9191	12.0795	11.343	10.6918	10.1119	9.59219	9.12371	8.69928	8.31295	7.95982	7.63579	7.33739	7.06171	6.80625	6.56885	6.34767	6.1411	5.94775	5.76637	5.5959	5.43537	5.28395	5.14087	5.00547	4.87715	4.75536	4.63962	4.52949
							16.5	667.147	141.999	79.6233	55.3395	42.4166	34.3933	28.9273	24.9639	21.9585	19.6011	17.7026	16.1409	14.8336	13.7232	12.7685	11.9387	11.2109	10.5674	9.99427	9.48063	9.01765	8.5982	8.21642	7.86743	7.54721	7.25232	6.97987	6.72741	6.4928	6.27422	6.07008	5.87899	5.69975	5.53128	5.37264	5.22299	5.08159	4.94779	4.82097	4.70061	4.58623	4.47739
							17	659.685	140.412	78.7336	54.7215	41.9431	34.0096	28.6047	24.6857	21.7139	19.3829	17.5056	15.9613	14.6687	13.5708	12.6267	11.8062	11.0865	10.4502	9.88351	9.37562	8.91783	8.50307	8.12555	7.78047	7.46383	7.17224	6.90284	6.6532	6.42122	6.20508	6.00322	5.81428	5.63704	5.47045	5.31358	5.16561	5.0258	4.89349	4.76809	4.64908	4.53597	4.42835
							17.5	652.649	138.915	77.8947	54.1388	41.4967	33.6478	28.3006	24.4234	21.4833	19.1771	17.3199	15.7921	14.5132	13.427	12.493	11.6813	10.9693	10.3397	9.77908	9.27661	8.8237	8.41336	8.03987	7.69848	7.38521	7.09673	6.83021	6.58323	6.35372	6.13989	5.94019	5.75325	5.5779	5.41309	5.2579	5.11151	4.97319	4.84229	4.71822	4.60048	4.48859	4.38211
							18	646.003	137.501	77.1024	53.5884	41.0751	33.3061	28.0133	24.1756	21.2654	18.9828	17.1444	15.6322	14.3663	13.2912	12.3667	11.5632	10.8585	10.2354	9.68044	9.18309	8.73479	8.32864	7.95895	7.62103	7.31095	7.02541	6.7616	6.51714	6.28997	6.07831	5.88064	5.69562	5.52205	5.35892	5.20531	5.06041	4.92349	4.79393	4.67113	4.55458	4.44383	4.33844
							18.5	639.716	136.164	76.3528	53.0677	40.6762	32.9828	27.7416	23.9412	21.0594	18.7989	16.9785	15.481	14.2274	13.1628	12.2472	11.4516	10.7537	10.1367	9.58713	9.09462	8.65068	8.24848	7.88239	7.54776	7.2407	6.95794	6.6967	6.45462	6.22966	6.02006	5.82432	5.64109	5.46922	5.30767	5.15556	5.01206	4.87648	4.74818	4.62657	4.51116	4.40149	4.29712
							19	633.759	134.896	75.6427	52.5744	40.2982	32.6766	27.4841	23.7191	20.8641	18.6247	16.8212	15.3377	14.0958	13.041	12.1341	11.3458	10.6545	10.0431	9.49872	9.01079	8.57099	8.17254	7.80986	7.47835	7.17415	6.89402	6.63521	6.39538	6.17251	5.96487	5.77095	5.58943	5.41916	5.25912	5.10842	4.96626	4.83194	4.70483	4.58436	4.47003	4.36137	4.25798
							19.5	628.108	133.694	74.9689	52.1063	39.9397	32.386	27.2398	23.5084	20.6789	18.4595	16.6721	15.2017	13.9709	12.9256	12.0267	11.2455	10.5603	9.95441	9.41484	8.93127	8.49539	8.10049	7.74104	7.41249	7.111	6.83337	6.57687	6.33918	6.1183	5.91251	5.72032	5.54042	5.37166	5.21305	5.06369	4.92281	4.78968	4.66371	4.54431	4.431	4.32331	4.22084
							20	622.739	132.552	74.3287	51.6616	39.599	32.1099	27.0077	23.3082	20.5029	18.3024	16.5303	15.0725	13.8523	12.8159	11.9247	11.1501	10.4708	9.8701	9.33515	8.85571	8.42356	8.03203	7.67566	7.34991	7.051	6.77574	6.52144	6.28578	6.06679	5.86276	5.67221	5.49385	5.32654	5.16928	5.0212	4.88152	4.74954	4.62464	4.50626	4.39392	4.28715	4.18555
							20.5	617.631	131.465	73.7197	51.2386	39.2749	31.8472	26.7869	23.1178	20.3354	18.1531	16.3955	14.9497	13.7394	12.7115	11.8276	11.0594	10.3857	9.78991	9.25934	8.78383	8.35523	7.96691	7.61346	7.29039	6.99393	6.72093	6.46871	6.23499	6.01779	5.81544	5.62645	5.44955	5.28361	5.12765	4.98078	4.84224	4.71134	4.58747	4.47006	4.35864	4.25275	4.15198
							21	612.766	130.43	73.1397	50.8357	38.9663	31.5971	26.5767	22.9364	20.176	18.0108	16.2671	14.8326	13.6319	12.6121	11.7352	10.9731	10.3046	9.71352	9.18714	8.71537	8.29014	7.90489	7.55423	7.23369	6.93957	6.66872	6.41849	6.18661	5.97112	5.77036	5.58287	5.40736	5.24273	5.08799	4.94228	4.80484	4.67497	4.55207	4.43559	4.32504	4.21997	4.12
							21.5	608.127	129.444	72.5867	50.4515	38.6719	31.3586	26.3761	22.7635	20.0239	17.8751	16.1446	14.721	13.5294	12.5173	11.647	10.8907	10.2273	9.64068	9.11829	8.65009	8.22808	7.84575	7.49774	7.17963	6.88774	6.61894	6.3706	6.14047	5.92662	5.72738	5.5413	5.36713	5.20374	5.05018	4.90557	4.76917	4.64028	4.51831	4.40271	4.29299	4.18872	4.08951
							22	603.699	128.501	72.0587	50.0847	38.391	31.1309	26.1847	22.5984	19.8788	17.7456	16.0277	14.6145	13.4316	12.4268	11.5629	10.812	10.1535	9.57115	9.05256	8.58778	8.16884	7.78929	7.44382	7.12803	6.83826	6.57142	6.32489	6.09644	5.88414	5.68635	5.50163	5.32872	5.16652	5.01408	4.87053	4.73511	4.60717	4.48609	4.37132	4.2624	4.15889	4.0604
							22.5	599.467	127.601	71.5541	49.7342	38.1225	30.9133	26.0018	22.4406	19.7401	17.6219	15.916	14.5127	13.338	12.3404	11.4825	10.7369	10.0829	9.50471	8.98975	8.52823	8.11223	7.73534	7.39228	7.07871	6.79097	6.526	6.2812	6.05435	5.84355	5.64714	5.46372	5.29202	5.13096	4.97958	4.83704	4.70257	4.57552	4.45528	4.34132	4.23317	4.13038	4.03258
							23	595.419	126.74	71.0715	49.399	37.8656	30.7051	25.8268	22.2897	19.6074	17.5035	15.8091	14.4153	13.2486	12.2577	11.4056	10.665	10.0155	9.44115	8.92967	8.47126	8.05807	7.68373	7.34299	7.03154	6.74574	6.48256	6.23941	6.01409	5.80471	5.60964	5.42745	5.25691	5.09694	4.94658	4.805	4.67145	4.54525	4.42582	4.31263	4.2052	4.10311	4.00597
							23.5	591.543	125.915	70.6094	49.078	37.6197	30.5058	25.6593	22.1451	19.4803	17.3901	15.7068	14.3221	13.1629	12.1785	11.3319	10.5962	9.95088	9.38029	8.87214	8.41672	8.00622	7.63431	7.29579	6.98637	6.70243	6.44096	6.1994	5.97555	5.76753	5.57372	5.39272	5.22329	5.06436	4.91499	4.77433	4.64164	4.51626	4.39761	4.28515	4.17843	4.077	3.98049
							24	587.828	125.125	70.1665	48.7703	37.384	30.3148	25.4987	22.0066	19.3586	17.2815	15.6087	14.2327	13.0809	12.1026	11.2613	10.5302	9.88897	9.32196	8.817	8.36444	7.95652	7.58695	7.25056	6.94307	6.66092	6.4011	6.16105	5.93861	5.7319	5.53931	5.35944	5.19108	5.03315	4.88471	4.74493	4.61307	4.48847	4.37057	4.25882	4.15277	4.05198	3.95607
							24.5	584.265	124.367	69.7417	48.4752	37.1579	30.1316	25.3447	21.8738	19.2418	17.1773	15.5147	14.147	13.0021	12.0298	11.1936	10.4669	9.82959	9.26601	8.76412	8.3143	7.90885	7.54152	7.20717	6.90155	6.62111	6.36286	6.12427	5.90317	5.69771	5.50629	5.32751	5.16017	5.0032	4.85566	4.71672	4.58566	4.46182	4.34463	4.23356	4.12815	4.02797	3.93265
							25	580.844	123.639	69.3338	48.1918	36.9409	29.9557	25.1968	21.7462	19.1296	17.0773	15.4244	14.0647	12.9265	11.9599	11.1286	10.4062	9.77257	9.2123	8.71334	8.26616	7.86308	7.4979	7.16551	6.86168	6.58288	6.32614	6.08895	5.86915	5.66489	5.47459	5.29686	5.1305	4.97445	4.82777	4.68964	4.55935	4.43624	4.31973	4.20931	4.10452	4.00493	3.91016
							25.5	577.557	122.94	68.9419	47.9196	36.7323	29.7866	25.0547	21.6237	19.0219	16.9811	15.3376	13.9856	12.8539	11.8927	11.0661	10.3478	9.71779	9.16069	8.66455	8.2199	7.81911	7.45599	7.12548	6.82337	6.54615	6.29087	6.05502	5.83646	5.63336	5.44414	5.26741	5.10199	4.94682	4.80096	4.66362	4.53406	4.41165	4.2958	4.18601	4.08181	3.98278	3.88855
							26	574.396	122.268	68.565	47.6578	36.5318	29.6241	24.9181	21.5058	18.9183	16.8887	15.2542	13.9096	12.7841	11.8281	11.0061	10.2917	9.66511	9.11106	8.61764	8.17542	7.77682	7.4157	7.08699	6.78654	6.51083	6.25695	6.02239	5.80502	5.60304	5.41485	5.2391	5.07458	4.92025	4.77519	4.6386	4.50975	4.38801	4.2728	4.16361	4.05997	3.96149	3.86778
							26.5	571.354	121.621	68.2024	47.4059	36.3388	29.4677	24.7866	21.3924	18.8186	16.7997	15.1739	13.8364	12.7168	11.766	10.9483	10.2377	9.61441	9.0633	8.57249	8.13262	7.73613	7.37692	7.04995	6.75109	6.47685	6.2243	5.99099	5.77478	5.57386	5.38667	5.21184	5.04819	4.89468	4.75039	4.61452	4.48636	4.36526	4.25066	4.14204	4.03896	3.941	3.84778
							27	568.425	120.997	67.8531	47.1633	36.1529	29.3171	24.66	21.2832	18.7226	16.7141	15.0965	13.7659	12.6521	11.7061	10.8926	10.1857	9.5656	9.0173	8.52902	8.09139	7.69694	7.33957	7.01428	6.71695	6.44412	6.19287	5.96075	5.74564	5.54576	5.35953	5.1856	5.02278	4.87005	4.72651	4.59133	4.46383	4.34335	4.22934	4.12128	4.01873	3.92127	3.82853
							27.5	565.602	120.397	67.5166	46.9295	35.9738	29.1719	24.538	21.178	18.63	16.6315	15.022	13.698	12.5897	11.6484	10.839	10.1355	9.51855	8.97298	8.48712	8.05167	7.65918	7.30358	6.97991	6.68405	6.41257	6.16257	5.9316	5.71757	5.51868	5.33337	5.1603	4.99829	4.84632	4.70349	4.56899	4.44211	4.32224	4.20879	4.10127	3.99922	3.90225	3.80997
							28	562.88	119.818	67.192	46.704	35.8011	29.032	24.4203	21.0765	18.5408	16.5519	14.9502	13.6325	12.5296	11.5928	10.7873	10.0872	9.47318	8.93024	8.44671	8.01336	7.62276	7.26887	6.94676	6.65233	6.38216	6.13336	5.9035	5.6905	5.49256	5.30815	5.13591	4.97468	4.82344	4.68129	4.54744	4.42118	4.30187	4.18897	4.08197	3.98042	3.88391	3.79208
							28.5	560.253	119.259	66.8788	46.4865	35.6344	28.8969	24.3068	20.9785	18.4547	16.4751	14.8808	13.5693	12.4715	11.5391	10.7374	10.0406	9.4294	8.88899	8.40773	7.9764	7.58761	7.23538	6.91477	6.62172	6.3528	6.10517	5.87638	5.66438	5.46736	5.2838	5.11236	4.95189	4.80136	4.65987	4.52665	4.40097	4.28223	4.16985	4.06335	3.96227	3.86621	3.77481
							29	557.716	118.719	66.5764	46.2764	35.4735	28.7665	24.1971	20.884	18.3716	16.4009	14.8139	13.5083	12.4155	11.4873	10.6892	9.99553	9.38713	8.84917	8.37008	7.9407	7.55368	7.20304	6.88389	6.59216	6.32446	6.07795	5.8502	5.63915	5.44303	5.2603	5.08963	4.92989	4.78004	4.63919	4.50657	4.38146	4.26326	4.15139	4.04537	3.94475	3.84913	3.75814
							29.5	555.266	118.198	66.2842	46.0735	35.318	28.6405	24.0912	20.7926	18.2912	16.3293	14.7492	13.4494	12.3613	11.4372	10.6426	9.95201	9.34629	8.81069	8.33371	7.90622	7.5209	7.1718	6.85405	6.5636	6.29708	6.05165	5.8249	5.61478	5.41952	5.23759	5.06767	4.90863	4.75944	4.61921	4.48717	4.36261	4.24493	4.13355	4.028	3.92782	3.83262	3.74203
							30	552.897	117.694	66.0018	45.8773	35.1677	28.5186	23.9888	20.7043	18.2136	16.26	14.6866	13.3924	12.309	11.3888	10.5976	9.90994	9.3068	8.77349	8.29855	7.87288	7.48921	7.1416	6.8252	6.53599	6.27061	6.02623	5.80045	5.59122	5.39678	5.21563	5.04644	4.88807	4.73952	4.5999	4.46842	4.34439	4.22721	4.11631	4.01121	3.91146	3.81666	3.72645
[truncated: 19 more columns]
